# Supplementary material for: Poverty and health care demand in Kenya
Source: BMC Health Serv Res. 2014 Nov 22;14:560. doi: 10.1186/s12913-014-0560-y (PMC4243287; doi:10.1186/s12913-014-0560-y)
Supplement: Additional file 1 — This is the questionnaire that was used by the Kenya National Bureau of Statistics to collect the data used in the study. [file 12913_2014_560_MOESM1_ESM.pdf]

**STRICTLY CONFIDENTIAL**

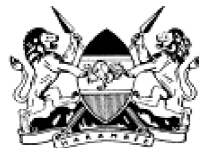

**CENTRAL BUREAU OF STATISTICS**  
Ministry of Planning and National Development  
P. O. Box 30266-00100 Nairobi. KENYA  
Tel. No. 317612/22/23: Email: herufi@cbs.go.ke

**KENYA INTEGRATED HOUSEHOLD BUDGET SURVEY (KIHBS), 2004/05**  
**HOUSEHOLD QUESTIONNAIRE**

THIS SURVEY IS BEING CONDUCTED BY THE CENTRAL BUREAU OF STATISTICS AS MANDATED BY THE STATISTICS ACT (CAP 112 OF THE LAWS OF KENYA).  
THIS INFORMATION IS STRICTLY CONFIDENTIAL AND IS TO BE USED FOR STATISTICAL PURPOSES ONLY.

**SECTION A-1: HOUSEHOLD IDENTIFICATION**

WRITE CODES and NAMES for Province; District; Division; Location; Sub-location; Cluster No.;

Dwelling Structure No.; Household No. and Household Head.

|                              | CODE                 | NAME |
|------------------------------|----------------------|------|
| A01. PROVINCE                | <input type="text"/> |      |
| A02. DISTRICT                | <input type="text"/> |      |
| A03. DIVISION                | <input type="text"/> |      |
| A04. LOCATION                | <input type="text"/> |      |
| A05. SUB-LOCATION            | <input type="text"/> |      |
| A06. CLUSTER                 | <input type="text"/> |      |
| A07. HOUSEHOLD NUMBER        | <input type="text"/> |      |
| A08. DWELLING STRUCTURE NO.: | <input type="text"/> |      |
| A09. LANGUAGE OF INTERVIEW   | <input type="text"/> |      |

|    |          |    |           |    |         |
|----|----------|----|-----------|----|---------|
| 01 | EMBU     | 06 | LUHYA     | 11 | SOMALI  |
| 02 | KALENJIN | 07 | LUO       | 12 | SWAHILI |
| 03 | KAMBA    | 08 | MAASAI    | 13 | ENGLISH |
| 04 | KIKUYU   | 09 | MERU      |    |         |
| 05 | KISII    | 10 | MIJIKENDA |    |         |

IF YOU USE MORE THAN ONE QUESTIONNAIRE TO COLLECT INFORMATION FROM THIS HOUSEHOLD, INDICATE BELOW e.g. 1 of 2.

|                      |    |                      |
|----------------------|----|----------------------|
| <input type="text"/> | of | <input type="text"/> |
|----------------------|----|----------------------|

A10. NAME OF HOUSEHOLD HEAD:

A11. DOES THIS HOUSEHOLD REPLACE ANOTHER SAMPLE HOUSEHOLD CHOSEN FOR THE SURVEY? YES..1; NO..2 (»A14)

A12. WHICH HOUSEHOLD IN THIS CLUSTER DOES IT REPLACE? HOUSEHOLD NUMBER OF ORIGINALLY SELECTED HOUSEHOLD

|                      |                      |                      |
|----------------------|----------------------|----------------------|
| <input type="text"/> | <input type="text"/> | <input type="text"/> |
|----------------------|----------------------|----------------------|

A13. WHY WAS ORIGINALLY SELECTED HOUSEHOLD REPLACED?

- 1 - DWELLING FOUND, BUT NO HH MEMBER COULD BE FOUND.  
2 - DWELLING FOUND, BUT RESPONDENT REFUSED.  
3 - DWELLING FOUND, BUT UNOCCUPIED.  
4 - DWELLING FOUND, BUT NOT A RESIDENTIAL BUILDING.  
5 - DWELLING DESTROYED.  
6 - DWELLING NOT FOUND.

QUESTIONNAIRE SERIAL NO.

CLUSTER

HOUSEHOLD NUMBER

HOUSEHOLD SERIAL NO.

|                      |                      |                      |                      |
|----------------------|----------------------|----------------------|----------------------|
| <input type="text"/> | <input type="text"/> | <input type="text"/> | <input type="text"/> |
| <input type="text"/> | <input type="text"/> | <input type="text"/> | <input type="text"/> |
| <input type="text"/> | <input type="text"/> | <input type="text"/> | <input type="text"/> |

**GPS CO-ORDINATES**

|             | Degrees              | Min                  | Sec                  |
|-------------|----------------------|----------------------|----------------------|
| LATITUDE    | <input type="text"/> | <input type="text"/> | <input type="text"/> |
| LONGITUDE   | <input type="text"/> | <input type="text"/> | <input type="text"/> |
| ALTITUDE M. | <input type="text"/> | <input type="text"/> | <input type="text"/> |

**SECTION A-2: SURVEY STAFF DETAILS**

A14. NAME OF INTERVIEWER: \_\_\_\_\_

A15. INTERVIEWER CODE: 

|  |  |  |
|--|--|--|
|  |  |  |
|--|--|--|

| RESULT CODES           |
|------------------------|
| 1 COMPLETED.           |
| 2 NO ONE HOME          |
| 3 PARTIAL, INCOMPLETE. |

A16. DATE OF INTERVIEW: DD MM YY

|               | DD | MM | YY | SECTIONS | RESULT |
|---------------|----|----|----|----------|--------|
| First visit   |    | /  | /  |          |        |
| Second visit  |    | /  | /  |          |        |
| Third visit   |    | /  | /  |          |        |
| Forth visit   |    | /  | /  |          |        |
| Fifth visit   |    | /  | /  |          |        |
| Sixth visit   |    | /  | /  |          |        |
| Seventh visit |    | /  | /  |          |        |
| Eighth visit  |    | /  | /  |          |        |
| Ninth visit   |    | /  | /  |          |        |
| Tenth visit   |    | /  | /  |          |        |

A28. DATE OF DATA ENTRY: DD MM YY

|               | DD | MM | YY | SECTIONS | RESULT |
|---------------|----|----|----|----------|--------|
| First Entry   |    | /  | /  |          |        |
| Second Entry  |    | /  | /  |          |        |
| Third Entry   |    | /  | /  |          |        |
| Forth Entry   |    | /  | /  |          |        |
| Fifth Entry   |    | /  | /  |          |        |
| Sixth Entry   |    | /  | /  |          |        |
| Seventh Entry |    | /  | /  |          |        |
| Eighth Entry  |    | /  | /  |          |        |
| Ninth Entry   |    | /  | /  |          |        |
| Tenth Entry   |    | /  | /  |          |        |

A17. NAME OF TEAM LEADER: \_\_\_\_\_

A18. TEAM LEADER CODE: 

|  |  |  |
|--|--|--|
|  |  |  |
|--|--|--|

A19. DATE OF QUESTIONNAIRE INSPECTION:

A20. NAME OF ZONE COORDINATOR \_\_\_\_\_

A21. ZONE COORDINATOR CODE 

|  |  |  |
|--|--|--|
|  |  |  |
|--|--|--|

A22. DATE OF INSPECTION 

|  |  |  |
|--|--|--|
|  |  |  |
|--|--|--|

A23. NAME OF DATA ENTRY OPERATOR IN FIELD: \_\_\_\_\_

A24. DATA ENTRY OPERATOR CODE: 

|  |  |  |
|--|--|--|
|  |  |  |
|--|--|--|

A25. NAME OF DATA ENTRY OPERATOR AT HQ: \_\_\_\_\_

A26. DATA ENTRY OPERATOR CODE: 

|  |  |  |
|--|--|--|
|  |  |  |
|--|--|--|

A27. DATE OF DATA VALIDATION: 

|  |  |  |
|--|--|--|
|  |  |  |
|--|--|--|

**SPECIAL REMARKS/COMMENTS**

**INTRODUCTION TO THE HOUSEHOLD TO BE INTERVIEWED**

**CONVEY THE FOLLOWING INFORMATION TO THE RESPONDENT**

*The Central Bureau of Statistics occasionally selects at random several hundred households in the country to ask them questions about how they live. The responses provided by the households help the Government of Kenya and other key stakeholders to plan for the welfare of all Kenyans.*

*Your household was randomly selected as one of those to which the KIHBS questions will be asked from a list of all of the households in this area.*

*I therefore, would like to ask you some questions as a responsible member of this household. I will also need your assistance in asking some questions to other members of your household; weighing and measuring the height of any children under age 5 years who live in your household;and obtaining measurement of your rooms. These questions will take some time to complete and therefore I would appreciate your patience. I want to assure you that under no circumstance will the information be used for any purpose other than meeting the objectives of the survey. I shall also be visting your house frequently for the next 20 days Before I start, do you have any questions or is there anything which I have said on which you would like any further clarification? Otherwise, may I proceed with interviewing you and members of your household?*

**Tick appropriately**

☐

ACCEPT

☐

REJECT

**TABLE OF CONTENTS**

| <u>Page</u> |                                                                 | <u>Page</u> |                                                         |
|-------------|-----------------------------------------------------------------|-------------|---------------------------------------------------------|
| 1           | SECTION A-1: HOUSEHOLD IDENTIFICATION                           | 37          | SECTION K: NON FOOD ITEMS EXPENDITURES - PAST ONE MONTH |
| 2           | SECTION A-2: SURVEY STAFF DETAILS                               | 39          | SECTION L: NON-FOOD EXPENDITURES – PAST ONE MONTH       |
| 4           | SECTION B: HOUSEHOLD MEMBER ROSTER                              | 41          | SECTION M: EXPENDITURES ON DURABLES                     |
| 6           | SECTION C: EDUCATION                                            | 44          | SECTION N: AGRICULTURE HOLDING                          |
| 9           | SECTION D: HEALTH, FERTILITY AND HOUSEHOLD DEATHS               | 47          | SECTION O: AGRICULTURE OUTPUT                           |
| 14          | SECTION E: LABOUR                                               | 49          | SECTION P: LIVESTOCK                                    |
| 18          | SECTION F: CHILD HEALTH AND ANTHROPOMETRY                       | 53          | SECTION Q: HOUSEHOLD ENTERPRISES                        |
| 23          | SECTION G: HOUSING                                              | 55          | SECTION R: TRANSFERS                                    |
| 24          | SECTION H: WATER, SANITATION AND ENERGY USE                     | 56          | SECTION S: OTHER INCOME                                 |
| 26          | SECTION H: WATER, SANITATION AND ENERGY USE                     | 57          | SECTION T: RECENT SHOCKS TO HOUSEHOLD WELFARE           |
| 27          | SECTION I: CONSUMPTION OF FOOD OVER PAST ONE WEEK               | 58          | SECTION U: CREDIT                                       |
| 35          | SECTION J: REGULAR NON FOOD ITEMS EXPENDITURES - PAST ONE MONTH |             |                                                         |

IN ORDER TO MAKE A COMPREHENSIVE LIST OF INDIVIDUALS CONNECTED TO THE HOUSEHOLD, USE THE FOLLOWING PROBE QUESTIONS:

First, give me the names of all the members of your immediate (nuclear) family who normally live and eat their meals together here.

WRITE DOWN NAMES, SEX, AND RELATIONSHIP TO HOUSEHOLD HEAD (B02 to B04). LIST HOUSEHOLD HEAD ON LINE 1.

Then, give me the names of any other persons related to you or other household members who normally live and eat their meals together here.

FILL IN B02 to B04.

Are there any other persons not here now who normally live and eat their meals here? For example, household members studying elsewhere or traveling.

FILL IN B02 to B04.

Then, give me the names of any other persons not related to you or other household members, but who normally live and eat their meals together here, such as live-in servants.

FILL IN B02 to B04.

Finally, are there any other persons who slept here last night, but who do not normally live here such as visitors, persons on transit?

FILL IN B02 to B04.

IF MORE THAN 12 INDIVIDUALS, USE SECOND QUESTIONNAIRE. MAKE SURE TO MARK BOX ON FIRST PAGE OF BOTH QUESTIONNAIRES.

## **SECTION B: HOUSEHOLD MEMBER ROSTER**

[ASK DIRECTLY OF ALL PERSONS IN THE HOUSEHOLD. MOTHERS OR GUARDIANS TO ANSWER FOR CHILDREN UNDER 10 YEARS OF AGE.]

| B01                        | B02                                                                                                                                                                                                                                        | B03                                                                                                                                                                                                                                 | B04                           | B05                                                                                                                                                                                 |        |
|----------------------------|--------------------------------------------------------------------------------------------------------------------------------------------------------------------------------------------------------------------------------------------|-------------------------------------------------------------------------------------------------------------------------------------------------------------------------------------------------------------------------------------|-------------------------------|-------------------------------------------------------------------------------------------------------------------------------------------------------------------------------------|--------|
|                            | NAME                                                                                                                                                                                                                                       | What is [NAME]'s relationship to the head of household?                                                                                                                                                                             | SEX                           | How old is [NAME]?                                                                                                                                                                  |        |
| I<br>D<br>C<br>O<br>D<br>E | <p>MAKE A COMPLETE LIST OF ALL INDIVIDUALS WHO NORMALLY LIVE AND EAT THEIR MEALS TOGETHER IN THIS HOUSEHOLD, STARTING WITH THE HEAD OF HOUSEHOLD.</p> <p>(CONFIRM THAT HOUSEHOLD HEAD HERE IS SAME AS HOUSEHOLD HEAD LISTED ON COVER.)</p> | <p>HEAD 1</p> <p>SPOUSE 2</p> <p>SON 3</p> <p>DAUGHTER 4</p> <p>FATHER/MOTHER 5</p> <p>SISTER/BROTHER 6</p> <p>GRANDCHILD 7</p> <p>OTHER RELATIVE (SPECIFY) 8</p> <p>SERVANT (live-in) 9</p> <p>OTHER NON-RELATIVE (SPECIFY) 10</p> | <p>MALE 1</p> <p>FEMALE 2</p> | <p>IF 6 YEARS OR OLDER, GIVE YEARS ONLY. IF LESS THAN 6 YEARS IN AGE, GIVE YEARS AND MONTHS.</p> <p>97 YEARS AND OVER, CODE 97. AGE IS NOT KNOWN, CODE 98. NOT STATED, CODE 99.</p> |        |
|                            |                                                                                                                                                                                                                                            |                                                                                                                                                                                                                                     |                               | YEARS                                                                                                                                                                               | MONTHS |
| 1                          |                                                                                                                                                                                                                                            |                                                                                                                                                                                                                                     |                               |                                                                                                                                                                                     |        |
| 2                          |                                                                                                                                                                                                                                            |                                                                                                                                                                                                                                     |                               |                                                                                                                                                                                     |        |
| 3                          |                                                                                                                                                                                                                                            |                                                                                                                                                                                                                                     |                               |                                                                                                                                                                                     |        |
| 4                          |                                                                                                                                                                                                                                            |                                                                                                                                                                                                                                     |                               |                                                                                                                                                                                     |        |
| 5                          |                                                                                                                                                                                                                                            |                                                                                                                                                                                                                                     |                               |                                                                                                                                                                                     |        |
| 6                          |                                                                                                                                                                                                                                            |                                                                                                                                                                                                                                     |                               |                                                                                                                                                                                     |        |
| 7                          |                                                                                                                                                                                                                                            |                                                                                                                                                                                                                                     |                               |                                                                                                                                                                                     |        |
| 8                          |                                                                                                                                                                                                                                            |                                                                                                                                                                                                                                     |                               |                                                                                                                                                                                     |        |
| 9                          |                                                                                                                                                                                                                                            |                                                                                                                                                                                                                                     |                               |                                                                                                                                                                                     |        |
| 10                         |                                                                                                                                                                                                                                            |                                                                                                                                                                                                                                     |                               |                                                                                                                                                                                     |        |
| 11                         |                                                                                                                                                                                                                                            |                                                                                                                                                                                                                                     |                               |                                                                                                                                                                                     |        |
| 12                         |                                                                                                                                                                                                                                            |                                                                                                                                                                                                                                     |                               |                                                                                                                                                                                     |        |

|                                |     |                                      |      |                  |                                                                                                                                                                                        |  |                                                                                            |                                                                                                                                                                                                                                         |                           |                                                   |                    |  |                                                                                |                                                                                                                                                                                                                                                                                                                                                                                                                                              |
|--------------------------------|-----|--------------------------------------|------|------------------|----------------------------------------------------------------------------------------------------------------------------------------------------------------------------------------|--|--------------------------------------------------------------------------------------------|-----------------------------------------------------------------------------------------------------------------------------------------------------------------------------------------------------------------------------------------|---------------------------|---------------------------------------------------|--------------------|--|--------------------------------------------------------------------------------|----------------------------------------------------------------------------------------------------------------------------------------------------------------------------------------------------------------------------------------------------------------------------------------------------------------------------------------------------------------------------------------------------------------------------------------------|
| I<br>D<br><br>C<br>O<br>D<br>E | B01 | B06<br>What is NAME's date of birth? |      |                  | B07<br>For how many cumulated months during the last 12 months (since MONTH/YEAR) has [NAME] <u>been away</u> from this household? FOR VISITORS CODE <b>77</b> and TERMINATE INTERVIEW |  | B08<br>WHICH HOUSEHOLD MEMBER PROVIDED INFORMATION OF THE INDIVIDUAL?<br><br>WRITE ID CODE | B09<br>Where was NAME raised/brought up?                                                                                                                                                                                                |                           | B10<br>What was NAME's District/Country of birth? |                    |  | B11<br>In which year did NAME move to this district or country? ENTER 4 DIGITS | B12<br>Why did NAME move to this district/country?<br><br>PARENTS MOVED ..... 1<br>TO LIVE WITH RELATIVES ..... 2<br>SCHOOLING ..... 3<br>MARRIAGE ..... 4<br>FAMILY QUARREL ..... 5<br>DIVORCE ..... 6<br>RETURN FROM WORK ELSEWHERE ..... 7<br>JOB TRANSFER ..... 8<br>LOOK FOR WORK ..... 9<br>START NEW JOB OR BUSINESS ..... 10<br>LOOKING FOR LAND TO FARM ..... 11<br>TO RECOVER FROM ILLNESS 12<br>OTHER ( <i>SPECIFY</i> ) ..... 13 |
|                                |     | D K 98<br>NS 99                      |      |                  |                                                                                                                                                                                        |  |                                                                                            | CURRENT VILLAGE /TOWN/CITY 1<br>(»B13)<br><br>OTHER VILLAGE IN THIS DISTRICT 2<br>(»B13)<br><br>OTHER TOWN/CITY IN THIS DISTRICT 3<br>(»B13)<br><br>VILLAGE IN OTHER DISTRICT 4<br><br>TOWN/CITY IN OTHER DISTRICT 5<br>OUTSIDE KENYA 6 | WRITE DISTRICT or COUNTRY |                                                   | CODE BY SUPERVISOR |  |                                                                                |                                                                                                                                                                                                                                                                                                                                                                                                                                              |
|                                | DAY | MONTH                                | YEAR | CUMULATED MONTHS |                                                                                                                                                                                        |  |                                                                                            | Province                                                                                                                                                                                                                                | District                  | YEAR                                              |                    |  |                                                                                |                                                                                                                                                                                                                                                                                                                                                                                                                                              |
|                                | 1   |                                      |      |                  |                                                                                                                                                                                        |  |                                                                                            |                                                                                                                                                                                                                                         |                           |                                                   |                    |  |                                                                                |                                                                                                                                                                                                                                                                                                                                                                                                                                              |
|                                | 2   |                                      |      |                  |                                                                                                                                                                                        |  |                                                                                            |                                                                                                                                                                                                                                         |                           |                                                   |                    |  |                                                                                |                                                                                                                                                                                                                                                                                                                                                                                                                                              |
|                                | 3   |                                      |      |                  |                                                                                                                                                                                        |  |                                                                                            |                                                                                                                                                                                                                                         |                           |                                                   |                    |  |                                                                                |                                                                                                                                                                                                                                                                                                                                                                                                                                              |
|                                | 4   |                                      |      |                  |                                                                                                                                                                                        |  |                                                                                            |                                                                                                                                                                                                                                         |                           |                                                   |                    |  |                                                                                |                                                                                                                                                                                                                                                                                                                                                                                                                                              |
|                                | 5   |                                      |      |                  |                                                                                                                                                                                        |  |                                                                                            |                                                                                                                                                                                                                                         |                           |                                                   |                    |  |                                                                                |                                                                                                                                                                                                                                                                                                                                                                                                                                              |
|                                | 6   |                                      |      |                  |                                                                                                                                                                                        |  |                                                                                            |                                                                                                                                                                                                                                         |                           |                                                   |                    |  |                                                                                |                                                                                                                                                                                                                                                                                                                                                                                                                                              |
|                                | 7   |                                      |      |                  |                                                                                                                                                                                        |  |                                                                                            |                                                                                                                                                                                                                                         |                           |                                                   |                    |  |                                                                                |                                                                                                                                                                                                                                                                                                                                                                                                                                              |
|                                | 8   |                                      |      |                  |                                                                                                                                                                                        |  |                                                                                            |                                                                                                                                                                                                                                         |                           |                                                   |                    |  |                                                                                |                                                                                                                                                                                                                                                                                                                                                                                                                                              |
|                                | 9   |                                      |      |                  |                                                                                                                                                                                        |  |                                                                                            |                                                                                                                                                                                                                                         |                           |                                                   |                    |  |                                                                                |                                                                                                                                                                                                                                                                                                                                                                                                                                              |
|                                | 10  |                                      |      |                  |                                                                                                                                                                                        |  |                                                                                            |                                                                                                                                                                                                                                         |                           |                                                   |                    |  |                                                                                |                                                                                                                                                                                                                                                                                                                                                                                                                                              |
|                                | 11  |                                      |      |                  |                                                                                                                                                                                        |  |                                                                                            |                                                                                                                                                                                                                                         |                           |                                                   |                    |  |                                                                                |                                                                                                                                                                                                                                                                                                                                                                                                                                              |
|                                | 12  |                                      |      |                  |                                                                                                                                                                                        |  |                                                                                            |                                                                                                                                                                                                                                         |                           |                                                   |                    |  |                                                                                |                                                                                                                                                                                                                                                                                                                                                                                                                                              |

| For persons aged 30 years and below |                                                    |                                       |                                                |                                       |                                              |                          |                                |                                                 |                                                                                         |        |       |        |                                                           |                                                                             |                                                                                      |  |
|-------------------------------------|----------------------------------------------------|---------------------------------------|------------------------------------------------|---------------------------------------|----------------------------------------------|--------------------------|--------------------------------|-------------------------------------------------|-----------------------------------------------------------------------------------------|--------|-------|--------|-----------------------------------------------------------|-----------------------------------------------------------------------------|--------------------------------------------------------------------------------------|--|
| B01                                 | B13                                                | B14                                   | B15                                            | B16                                   | B17                                          | B18                      | B19                            | B20                                             | B21                                                                                     |        |       |        | B22                                                       | B23                                                                         | B24                                                                                  |  |
| I<br>D<br><br>C<br>O<br>D<br>E      | Is NAME's biological father alive?                 | What was NAME's age when father died? | Is NAME'S biological mother alive?             | What was NAME's age when mother died? | CHECK: IS THE RESPONDENT 10 YEARS AND OLDER? | What is NAME's religion? | What is NAME's marital status? | Does spouse/partner live in this household now? | COPY THE ID CODE OF THE SPOUSE/PARTNER.                                                 |        |       |        | Does NAME have a spouse living outside of this household? | How many spouses does NAME have who are residing outside of this household? | ASK HH HEAD OR ANY RESPONSIBLE MEMBER OF HH:                                         |  |
|                                     | YES, LIVING IN THIS HOUSEHOLD, COPY ROSTER ID CODE |                                       | YES, LIVING IN THIS HOUSEHOLD,                 |                                       |                                              |                          | MONOGAMOUS MARRIED . . . . . 1 |                                                 | IF MORE THAN ONE SPOUSE, COPY ID CODES OF ALL SPOUSES RESIDENT IN HOUSEHOLD FROM ROSTER |        |       |        |                                                           |                                                                             | How many children aged under 15 years who are children of an adult in this household |  |
|                                     | (»B15)                                             |                                       |                                                |                                       |                                              |                          | POLYGAMOUS MARRIED . . . . . 2 |                                                 | (THEN, IF FEMALE »B24. IF MALE »B23.)                                                   |        |       |        |                                                           |                                                                             | <u>live elsewhere</u>                                                                |  |
|                                     | YES, LIVING OUTSIDE THIS HOUSEHOLD . . . . . 96    |                                       | COPY ROSTER ID CODE                            |                                       |                                              |                          | LIVING TOGETHER . . . . 3      |                                                 |                                                                                         |        |       |        |                                                           |                                                                             | (live outside household)?                                                            |  |
|                                     | (»B15)                                             |                                       | (»B17)                                         |                                       |                                              |                          | 1 SEPARATED . . . . 4          |                                                 |                                                                                         |        |       |        |                                                           |                                                                             |                                                                                      |  |
|                                     | DECEASED . . . . . 97                              |                                       | YES LIVING OUTSIDE THIS HOUSEHOLD . . . . . 96 |                                       |                                              | CATHOLIC                 | 2 DIVORCED . . . . . 5         |                                                 |                                                                                         |        |       |        |                                                           |                                                                             |                                                                                      |  |
|                                     | DOESN'T KNOW . . . . . 98                          | D K 98                                | HOUSEHOLD . . . . . 96                         | D K 98                                | YES . . . . 1                                | PROTESTANT               | 3 WIDOW OR                     |                                                 |                                                                                         |        |       |        |                                                           |                                                                             |                                                                                      |  |
|                                     | (»B15)                                             | NS 99                                 | (»B17)                                         | NS 99                                 | NO . . . . 2                                 | OTHER CHRISTIAN          | 4 WIDOWER . . . . . 6          |                                                 |                                                                                         |        |       |        |                                                           |                                                                             |                                                                                      |  |
|                                     |                                                    |                                       | DECEASED . . . . . 97                          |                                       | »NEXT PERSON                                 | MUSLIM                   | 5 NEVER                        | YES . . . . . 1                                 |                                                                                         |        |       |        |                                                           |                                                                             |                                                                                      |  |
|                                     |                                                    |                                       | DOESN'T KNOW . . . . . 98                      |                                       |                                              | TRADITIONALIST           | 6 MARRIED . . . . . 7          | NO . . . . . 2                                  |                                                                                         |        |       |        |                                                           |                                                                             |                                                                                      |  |
|                                     |                                                    |                                       | (»B17)                                         |                                       |                                              | NO RELIGION              | If Code 4,5,6,or 7 »B24        | ( »B22 )                                        |                                                                                         |        |       |        |                                                           |                                                                             |                                                                                      |  |
|                                     |                                                    | AGE IN COMPLETED YEARS                |                                                | AGE IN COMPLETED YEARS                |                                              | OTHER RELIGION           |                                |                                                 | FIRST                                                                                   | SECOND | THIRD | FOURTH |                                                           | NUMBER                                                                      | NUMBER                                                                               |  |
| 1                                   |                                                    |                                       |                                                |                                       |                                              |                          |                                |                                                 |                                                                                         |        |       |        |                                                           |                                                                             |                                                                                      |  |
| 2                                   |                                                    |                                       |                                                |                                       |                                              |                          |                                |                                                 |                                                                                         |        |       |        |                                                           |                                                                             |                                                                                      |  |
| 3                                   |                                                    |                                       |                                                |                                       |                                              |                          |                                |                                                 |                                                                                         |        |       |        |                                                           |                                                                             |                                                                                      |  |
| 4                                   |                                                    |                                       |                                                |                                       |                                              |                          |                                |                                                 |                                                                                         |        |       |        |                                                           |                                                                             |                                                                                      |  |
| 5                                   |                                                    |                                       |                                                |                                       |                                              |                          |                                |                                                 |                                                                                         |        |       |        |                                                           |                                                                             |                                                                                      |  |
| 6                                   |                                                    |                                       |                                                |                                       |                                              |                          |                                |                                                 |                                                                                         |        |       |        |                                                           |                                                                             |                                                                                      |  |
| 7                                   |                                                    |                                       |                                                |                                       |                                              |                          |                                |                                                 |                                                                                         |        |       |        |                                                           |                                                                             |                                                                                      |  |
| 8                                   |                                                    |                                       |                                                |                                       |                                              |                          |                                |                                                 |                                                                                         |        |       |        |                                                           |                                                                             |                                                                                      |  |
| 9                                   |                                                    |                                       |                                                |                                       |                                              |                          |                                |                                                 |                                                                                         |        |       |        |                                                           |                                                                             |                                                                                      |  |
| 10                                  |                                                    |                                       |                                                |                                       |                                              |                          |                                |                                                 |                                                                                         |        |       |        |                                                           |                                                                             |                                                                                      |  |
| 11                                  |                                                    |                                       |                                                |                                       |                                              |                          |                                |                                                 |                                                                                         |        |       |        |                                                           |                                                                             |                                                                                      |  |
| 12                                  |                                                    |                                       |                                                |                                       |                                              |                          |                                |                                                 |                                                                                         |        |       |        |                                                           |                                                                             |                                                                                      |  |

SECTION C: EDUCATION

[ASK ALL PERSONS AGED 3 YEARS AND OLDER. MOTHERS OR GUARDIANS TO ANSWER FOR CHILDREN UNDER 10 YEARS OF AGE.]

|                                |                                                                                                                                                          |                                                                                      |                                                                                            |                  |                                                      |                                                                                                                                                                                                                                                                                                      |                                                |                                                                                                                                                                                                                                                                                               |                                                 |                                                                                                                                                                                                                         |
|--------------------------------|----------------------------------------------------------------------------------------------------------------------------------------------------------|--------------------------------------------------------------------------------------|--------------------------------------------------------------------------------------------|------------------|------------------------------------------------------|------------------------------------------------------------------------------------------------------------------------------------------------------------------------------------------------------------------------------------------------------------------------------------------------------|------------------------------------------------|-----------------------------------------------------------------------------------------------------------------------------------------------------------------------------------------------------------------------------------------------------------------------------------------------|-------------------------------------------------|-------------------------------------------------------------------------------------------------------------------------------------------------------------------------------------------------------------------------|
| C01                            | C02                                                                                                                                                      | C03                                                                                  | C04                                                                                        |                  | C05                                                  | C06                                                                                                                                                                                                                                                                                                  | C07                                            | C08                                                                                                                                                                                                                                                                                           | C09                                             | C10                                                                                                                                                                                                                     |
| I<br>D<br><br>C<br>O<br>D<br>E | PUT CODE '1' FOR ALL INDIVIDUALS WHO ARE AGED UNDER 3 YEARS. OTHERWISE CODE 2.<br><br><u>DO NOT ADMINISTER THIS MODULE TO THESE INDIVIDUALS CODED 1.</u> | Has NAME ever attended school?<br><br>Yes ..... 1<br>NO ..... 2<br><br><b>(»C11)</b> | What is the highest school grade that NAME has <u>completed</u> and in <u>which year</u> ? |                  | What was NAME highest vocational training completed? | What is the <u>highest educational qualification</u> has NAME acquired?                                                                                                                                                                                                                              | How old was NAME when started school?          | Did NAME attend school/ academic institution in the last school year?                                                                                                                                                                                                                         | What grade was NAME attending last school year? | Is NAME currently attending school?<br><br>IF SCHOOL IS NOT IN SESSION NOW, ASK: Did you attend school in the session just completed and plan to attend next session?<br><br>YES ..... 1<br><b>(»C12)</b><br>NO ..... 2 |
|                                |                                                                                                                                                          |                                                                                      | PRE -SCHOOL... 00 <b>(»C06)</b>                                                            |                  | GOVERNMENT                                           | NONE ..... 01<br>CPE/KCPE ..... 02<br>KCE/KCSE ..... 03<br>KJSE ..... 04<br>KACE/EAACE ..... 05<br>CERTIFICATE ..... 06<br>PUBLIC INSTITUTION<br>DIPLOMA ..... 07<br>PRIVATE INSTITUTION<br>DIPLOMA,..... 08<br>DEGREE ..... 09<br>POST-GRAD.UATE<br>DEGREE /DIPLOMA ... 10<br>OTHER SPECIFY..... 11 | YES ..... 1<br>NO ..... 2<br><br><b>(»C10)</b> | PRE-SCHOOL... 00<br><b>UNIVERSITY</b><br>UNIV. 1 ..... 15<br>UNIV. 2 ..... 16<br>UNIV. 3 ..... 17<br>UNIV. 4 ..... 18<br>UNIV. 5 & ABOVE ..... 19<br><b>TRAINING</b><br>GOVERNMENT<br>COLLEGE ..... 20<br>COMMERCIAL<br>COLLEGE ..... 21<br>VOCATIONAL/<br>VILLAGE ..... 22<br>OTHER ..... 23 |                                                 |                                                                                                                                                                                                                         |
|                                |                                                                                                                                                          |                                                                                      | <b>PRIMARY</b>                                                                             |                  | COLLEGE ..... 01                                     |                                                                                                                                                                                                                                                                                                      |                                                |                                                                                                                                                                                                                                                                                               |                                                 |                                                                                                                                                                                                                         |
|                                |                                                                                                                                                          |                                                                                      | STD. 1 ..... 01                                                                            | UNIV. 1 ..... 15 |                                                      |                                                                                                                                                                                                                                                                                                      |                                                |                                                                                                                                                                                                                                                                                               |                                                 |                                                                                                                                                                                                                         |
|                                |                                                                                                                                                          |                                                                                      | STD. 2 ..... 02                                                                            | UNIV. 2 ..... 16 |                                                      |                                                                                                                                                                                                                                                                                                      |                                                |                                                                                                                                                                                                                                                                                               |                                                 |                                                                                                                                                                                                                         |
|                                |                                                                                                                                                          |                                                                                      | STD. 3 ..... 03                                                                            | UNIV. 3 ..... 17 |                                                      |                                                                                                                                                                                                                                                                                                      |                                                |                                                                                                                                                                                                                                                                                               |                                                 |                                                                                                                                                                                                                         |
|                                |                                                                                                                                                          |                                                                                      | STD. 4 ..... 04                                                                            | UNIV. 4 ..... 18 |                                                      |                                                                                                                                                                                                                                                                                                      |                                                |                                                                                                                                                                                                                                                                                               |                                                 |                                                                                                                                                                                                                         |
|                                |                                                                                                                                                          |                                                                                      | STD. 5 ..... 05                                                                            | UNIV. 5 &        |                                                      |                                                                                                                                                                                                                                                                                                      |                                                |                                                                                                                                                                                                                                                                                               |                                                 |                                                                                                                                                                                                                         |
|                                |                                                                                                                                                          |                                                                                      | STD. 6 ..... 06                                                                            | ABOVE ..... 19   |                                                      |                                                                                                                                                                                                                                                                                                      |                                                |                                                                                                                                                                                                                                                                                               |                                                 |                                                                                                                                                                                                                         |
|                                |                                                                                                                                                          |                                                                                      | STD. 7 ..... 07                                                                            | None ..... 20    |                                                      |                                                                                                                                                                                                                                                                                                      |                                                |                                                                                                                                                                                                                                                                                               |                                                 |                                                                                                                                                                                                                         |
| STD. 8 ..... 08                | Other specify ..... 21                                                                                                                                   |                                                                                      |                                                                                            |                  |                                                      |                                                                                                                                                                                                                                                                                                      |                                                |                                                                                                                                                                                                                                                                                               |                                                 |                                                                                                                                                                                                                         |
| <b>SECONDARY</b>               |                                                                                                                                                          |                                                                                      |                                                                                            |                  |                                                      |                                                                                                                                                                                                                                                                                                      |                                                |                                                                                                                                                                                                                                                                                               |                                                 |                                                                                                                                                                                                                         |
| FORM 1 ..... 09                |                                                                                                                                                          |                                                                                      |                                                                                            |                  |                                                      |                                                                                                                                                                                                                                                                                                      |                                                |                                                                                                                                                                                                                                                                                               |                                                 |                                                                                                                                                                                                                         |
| FORM 2 ..... 10                |                                                                                                                                                          |                                                                                      |                                                                                            |                  |                                                      |                                                                                                                                                                                                                                                                                                      |                                                |                                                                                                                                                                                                                                                                                               |                                                 |                                                                                                                                                                                                                         |
| FORM 3 ..... 11                |                                                                                                                                                          |                                                                                      |                                                                                            |                  |                                                      |                                                                                                                                                                                                                                                                                                      |                                                |                                                                                                                                                                                                                                                                                               |                                                 |                                                                                                                                                                                                                         |
| FORM 4 ..... 12                |                                                                                                                                                          |                                                                                      |                                                                                            |                  |                                                      |                                                                                                                                                                                                                                                                                                      |                                                |                                                                                                                                                                                                                                                                                               |                                                 |                                                                                                                                                                                                                         |
| FORM 5 ..... 13                |                                                                                                                                                          |                                                                                      |                                                                                            |                  |                                                      |                                                                                                                                                                                                                                                                                                      |                                                |                                                                                                                                                                                                                                                                                               |                                                 |                                                                                                                                                                                                                         |
| FORM 6 ..... 14                |                                                                                                                                                          |                                                                                      |                                                                                            |                  |                                                      |                                                                                                                                                                                                                                                                                                      |                                                |                                                                                                                                                                                                                                                                                               |                                                 |                                                                                                                                                                                                                         |
| <b>GRADE</b>                   |                                                                                                                                                          | <b>YEAR</b>                                                                          |                                                                                            |                  |                                                      |                                                                                                                                                                                                                                                                                                      | YEARS                                          |                                                                                                                                                                                                                                                                                               |                                                 |                                                                                                                                                                                                                         |
| 1                              |                                                                                                                                                          |                                                                                      |                                                                                            |                  |                                                      |                                                                                                                                                                                                                                                                                                      |                                                |                                                                                                                                                                                                                                                                                               |                                                 |                                                                                                                                                                                                                         |
| 2                              |                                                                                                                                                          |                                                                                      |                                                                                            |                  |                                                      |                                                                                                                                                                                                                                                                                                      |                                                |                                                                                                                                                                                                                                                                                               |                                                 |                                                                                                                                                                                                                         |
| 3                              |                                                                                                                                                          |                                                                                      |                                                                                            |                  |                                                      |                                                                                                                                                                                                                                                                                                      |                                                |                                                                                                                                                                                                                                                                                               |                                                 |                                                                                                                                                                                                                         |
| 4                              |                                                                                                                                                          |                                                                                      |                                                                                            |                  |                                                      |                                                                                                                                                                                                                                                                                                      |                                                |                                                                                                                                                                                                                                                                                               |                                                 |                                                                                                                                                                                                                         |
| 5                              |                                                                                                                                                          |                                                                                      |                                                                                            |                  |                                                      |                                                                                                                                                                                                                                                                                                      |                                                |                                                                                                                                                                                                                                                                                               |                                                 |                                                                                                                                                                                                                         |
| 6                              |                                                                                                                                                          |                                                                                      |                                                                                            |                  |                                                      |                                                                                                                                                                                                                                                                                                      |                                                |                                                                                                                                                                                                                                                                                               |                                                 |                                                                                                                                                                                                                         |
| 7                              |                                                                                                                                                          |                                                                                      |                                                                                            |                  |                                                      |                                                                                                                                                                                                                                                                                                      |                                                |                                                                                                                                                                                                                                                                                               |                                                 |                                                                                                                                                                                                                         |
| 8                              |                                                                                                                                                          |                                                                                      |                                                                                            |                  |                                                      |                                                                                                                                                                                                                                                                                                      |                                                |                                                                                                                                                                                                                                                                                               |                                                 |                                                                                                                                                                                                                         |
| 9                              |                                                                                                                                                          |                                                                                      |                                                                                            |                  |                                                      |                                                                                                                                                                                                                                                                                                      |                                                |                                                                                                                                                                                                                                                                                               |                                                 |                                                                                                                                                                                                                         |
| 10                             |                                                                                                                                                          |                                                                                      |                                                                                            |                  |                                                      |                                                                                                                                                                                                                                                                                                      |                                                |                                                                                                                                                                                                                                                                                               |                                                 |                                                                                                                                                                                                                         |
| 11                             |                                                                                                                                                          |                                                                                      |                                                                                            |                  |                                                      |                                                                                                                                                                                                                                                                                                      |                                                |                                                                                                                                                                                                                                                                                               |                                                 |                                                                                                                                                                                                                         |
| 12                             |                                                                                                                                                          |                                                                                      |                                                                                            |                  |                                                      |                                                                                                                                                                                                                                                                                                      |                                                |                                                                                                                                                                                                                                                                                               |                                                 |                                                                                                                                                                                                                         |

|            |                                                                                                                                                                                                                                                                                                                                                                                                                                                                                                                       |            |                                                                                                                                                                                                                                                                                                                                                                                                                            |  |                                                                                                                                                                                                                                                                                                                                                       |                                                                                                                                                                                     |                                                                   |                                                                            |                                                                                                                                                         |                                                                                                                                                                                                                                                                                                                                                                                                                                                                                                     |
|------------|-----------------------------------------------------------------------------------------------------------------------------------------------------------------------------------------------------------------------------------------------------------------------------------------------------------------------------------------------------------------------------------------------------------------------------------------------------------------------------------------------------------------------|------------|----------------------------------------------------------------------------------------------------------------------------------------------------------------------------------------------------------------------------------------------------------------------------------------------------------------------------------------------------------------------------------------------------------------------------|--|-------------------------------------------------------------------------------------------------------------------------------------------------------------------------------------------------------------------------------------------------------------------------------------------------------------------------------------------------------|-------------------------------------------------------------------------------------------------------------------------------------------------------------------------------------|-------------------------------------------------------------------|----------------------------------------------------------------------------|---------------------------------------------------------------------------------------------------------------------------------------------------------|-----------------------------------------------------------------------------------------------------------------------------------------------------------------------------------------------------------------------------------------------------------------------------------------------------------------------------------------------------------------------------------------------------------------------------------------------------------------------------------------------------|
| C01        | C11                                                                                                                                                                                                                                                                                                                                                                                                                                                                                                                   |            | C12                                                                                                                                                                                                                                                                                                                                                                                                                        |  | C13                                                                                                                                                                                                                                                                                                                                                   | C14                                                                                                                                                                                 | C15                                                               | C16                                                                        | C17                                                                                                                                                     | C18                                                                                                                                                                                                                                                                                                                                                                                                                                                                                                 |
|            | Why did NAME stop or never attend school?                                                                                                                                                                                                                                                                                                                                                                                                                                                                             |            | What is the current grade NAME is attending?                                                                                                                                                                                                                                                                                                                                                                               |  | Who runs/ manages school NAME attending?                                                                                                                                                                                                                                                                                                              | How many days was NAME's school in session over the <u>past 2 weeks</u> ?                                                                                                           | How many days did NAME attend school in the <u>past 2 weeks</u> ? | CHECK: IF C08=YES or C10=YES <b>CODE YES .1 otherwise code 2 and » C24</b> | Did NAME at any time in the past 12 months, <u>temporarily withdraw from school</u> , so that NAME missed more than 2 consecutive weeks of instruction? | What was the <b>Main Reason</b> for NAME <u>temporarily withdrawing from school</u> ?                                                                                                                                                                                                                                                                                                                                                                                                               |
|            | <div>STILL TOO YOUNG<br/>TO ATTEND SCHOOL . . . . . 00<br/>NO MONEY FOR<br/>SCHOOL COSTS . . . . . 01<br/>POOR QUALITY OF SCHOOLS . . . . . 02<br/>OWN ILLNESS/DISABILITY . . . . . 03<br/>FAMILY ILLNESS/DISABILITY . . . . . 04<br/>NOT INTERESTED, LAZY . . . . . 05<br/>PARENTS DID NOT LET ME . . . . . 06<br/>HAD TO WORK OR HELP AT HOME . . . . . 07<br/>SCHOOL TOO FAR<br/>FROM HOME . . . . . 09<br/>SCHOOL CONFLICT WITH<br/>BELIEFS . . . . . 10<br/>OTHER (SPECIFY) . . . . . 11</div> <div>(»C16)</div> |            | <div>PRE-SCHOOL . . . . . 00<br/><b>PRIMARY</b><br/>STD. 1 . . . . . 01<br/>STD. 2 . . . . . 02<br/>STD. 3 . . . . . 03<br/>STD. 4 . . . . . 04<br/>STD. 5 . . . . . 05<br/>STD. 6 . . . . . 06<br/>STD. 7 . . . . . 07<br/>STD. 8 . . . . . 08<br/><b>SECONDARY</b><br/>FORM 1 . . . . . 09<br/>FORM 2 . . . . . 10<br/>FORM 3 . . . . . 11<br/>FORM 4 . . . . . 12<br/>FORM 5 . . . . . 13<br/>FORM 6 . . . . . 14</div> |  | <div><b>UNIVERSITY</b><br/>UNIV. 1 . . . . . 15<br/>UNIV. 2 . . . . . 16<br/>UNIV. 3 . . . . . 17<br/>UNIV. 4 . . . . . 18<br/>UNIV. 5 &amp;<br/>ABOVE . . . . . 19<br/><b>TRAINING</b><br/>GOVERNMENT<br/>COLLEGE . . . . . 20<br/>COMMERCIAL<br/>COLLEGE . . . . . 21<br/>VOCATIONAL/<br/>VILLAGE . . . . . 22<br/>OTHER SPECIFY . . . . . 23</div> | <div>GOVERNMENT . . . . . 01<br/>PRIVATE CHURCH . . . . . 02<br/>PRIVATE MUSLIM . . . . . 03<br/>PRIVATE OTHER . . . . . 04<br/>COMMUNITY . . . . . 05<br/>OTHER . . . . . 09</div> | NUMBER                                                            | NUMBER                                                                     | <div>Yes . . . . . 1<br/>NO . . . . . 2</div> <div>(»C19)</div>                                                                                         | <div>STILL TOO YOUNG<br/>TO ATTEND SCHOOL . . . . . 00<br/>NO MONEY FOR<br/>SCHOOL COSTS . . . . . 01<br/>POOR QUALITY OF SCHOOLS . . . . . 02<br/>OWN ILLNESS/DISABILITY . . . . . 03<br/>FAMILY ILLNESS/DISABILITY . . . . . 04<br/>NOT INTERESTED, LAZY . . . . . 05<br/>PARENTS DID NOT LET ME . . . . . 06<br/>HAD TO WORK OR HELP AT HOME . . . . . 07<br/>SCHOOL TOO FAR<br/>FROM HOME . . . . . 09<br/>SCHOOL CONFLICT WITH<br/>BELIEFS . . . . . 10<br/>OTHER (SPECIFY) . . . . . 11</div> |
| 1st Reason |                                                                                                                                                                                                                                                                                                                                                                                                                                                                                                                       | 2nd Reason |                                                                                                                                                                                                                                                                                                                                                                                                                            |  |                                                                                                                                                                                                                                                                                                                                                       |                                                                                                                                                                                     |                                                                   |                                                                            |                                                                                                                                                         |                                                                                                                                                                                                                                                                                                                                                                                                                                                                                                     |
| 1          |                                                                                                                                                                                                                                                                                                                                                                                                                                                                                                                       |            |                                                                                                                                                                                                                                                                                                                                                                                                                            |  |                                                                                                                                                                                                                                                                                                                                                       |                                                                                                                                                                                     |                                                                   |                                                                            |                                                                                                                                                         |                                                                                                                                                                                                                                                                                                                                                                                                                                                                                                     |
| 2          |                                                                                                                                                                                                                                                                                                                                                                                                                                                                                                                       |            |                                                                                                                                                                                                                                                                                                                                                                                                                            |  |                                                                                                                                                                                                                                                                                                                                                       |                                                                                                                                                                                     |                                                                   |                                                                            |                                                                                                                                                         |                                                                                                                                                                                                                                                                                                                                                                                                                                                                                                     |
| 3          |                                                                                                                                                                                                                                                                                                                                                                                                                                                                                                                       |            |                                                                                                                                                                                                                                                                                                                                                                                                                            |  |                                                                                                                                                                                                                                                                                                                                                       |                                                                                                                                                                                     |                                                                   |                                                                            |                                                                                                                                                         |                                                                                                                                                                                                                                                                                                                                                                                                                                                                                                     |
| 4          |                                                                                                                                                                                                                                                                                                                                                                                                                                                                                                                       |            |                                                                                                                                                                                                                                                                                                                                                                                                                            |  |                                                                                                                                                                                                                                                                                                                                                       |                                                                                                                                                                                     |                                                                   |                                                                            |                                                                                                                                                         |                                                                                                                                                                                                                                                                                                                                                                                                                                                                                                     |
| 5          |                                                                                                                                                                                                                                                                                                                                                                                                                                                                                                                       |            |                                                                                                                                                                                                                                                                                                                                                                                                                            |  |                                                                                                                                                                                                                                                                                                                                                       |                                                                                                                                                                                     |                                                                   |                                                                            |                                                                                                                                                         |                                                                                                                                                                                                                                                                                                                                                                                                                                                                                                     |
| 6          |                                                                                                                                                                                                                                                                                                                                                                                                                                                                                                                       |            |                                                                                                                                                                                                                                                                                                                                                                                                                            |  |                                                                                                                                                                                                                                                                                                                                                       |                                                                                                                                                                                     |                                                                   |                                                                            |                                                                                                                                                         |                                                                                                                                                                                                                                                                                                                                                                                                                                                                                                     |
| 7          |                                                                                                                                                                                                                                                                                                                                                                                                                                                                                                                       |            |                                                                                                                                                                                                                                                                                                                                                                                                                            |  |                                                                                                                                                                                                                                                                                                                                                       |                                                                                                                                                                                     |                                                                   |                                                                            |                                                                                                                                                         |                                                                                                                                                                                                                                                                                                                                                                                                                                                                                                     |
| 8          |                                                                                                                                                                                                                                                                                                                                                                                                                                                                                                                       |            |                                                                                                                                                                                                                                                                                                                                                                                                                            |  |                                                                                                                                                                                                                                                                                                                                                       |                                                                                                                                                                                     |                                                                   |                                                                            |                                                                                                                                                         |                                                                                                                                                                                                                                                                                                                                                                                                                                                                                                     |
| 9          |                                                                                                                                                                                                                                                                                                                                                                                                                                                                                                                       |            |                                                                                                                                                                                                                                                                                                                                                                                                                            |  |                                                                                                                                                                                                                                                                                                                                                       |                                                                                                                                                                                     |                                                                   |                                                                            |                                                                                                                                                         |                                                                                                                                                                                                                                                                                                                                                                                                                                                                                                     |
| 10         |                                                                                                                                                                                                                                                                                                                                                                                                                                                                                                                       |            |                                                                                                                                                                                                                                                                                                                                                                                                                            |  |                                                                                                                                                                                                                                                                                                                                                       |                                                                                                                                                                                     |                                                                   |                                                                            |                                                                                                                                                         |                                                                                                                                                                                                                                                                                                                                                                                                                                                                                                     |
| 11         |                                                                                                                                                                                                                                                                                                                                                                                                                                                                                                                       |            |                                                                                                                                                                                                                                                                                                                                                                                                                            |  |                                                                                                                                                                                                                                                                                                                                                       |                                                                                                                                                                                     |                                                                   |                                                                            |                                                                                                                                                         |                                                                                                                                                                                                                                                                                                                                                                                                                                                                                                     |
| 12         |                                                                                                                                                                                                                                                                                                                                                                                                                                                                                                                       |            |                                                                                                                                                                                                                                                                                                                                                                                                                            |  |                                                                                                                                                                                                                                                                                                                                                       |                                                                                                                                                                                     |                                                                   |                                                                            |                                                                                                                                                         |                                                                                                                                                                                                                                                                                                                                                                                                                                                                                                     |

|                                           |                                                                                                                                            |                                     |                                          |                           |                             |                                                          |                                |                              |                                  |                                 |                            |                   |                                                                                        |                                                                              |                                                                                                        |                                                                              |                                                                                                                      |                                        |
|-------------------------------------------|--------------------------------------------------------------------------------------------------------------------------------------------|-------------------------------------|------------------------------------------|---------------------------|-----------------------------|----------------------------------------------------------|--------------------------------|------------------------------|----------------------------------|---------------------------------|----------------------------|-------------------|----------------------------------------------------------------------------------------|------------------------------------------------------------------------------|--------------------------------------------------------------------------------------------------------|------------------------------------------------------------------------------|----------------------------------------------------------------------------------------------------------------------|----------------------------------------|
| C01<br><br>I<br>D<br><br>C<br>O<br>D<br>E | C19<br>How much was spent on NAME's education in the last 12 months by members of your household:<br><br>IF NOTHING WAS SPENT, WRITE ZERO. |                                     |                                          |                           |                             |                                                          |                                |                              |                                  |                                 |                            |                   | C20<br>Did any persons outside your household contribute to NAME'S education expenses? | C21<br>What was the value of this assistance received in the past 12 months? | C22<br>Did NAME receive a scholarship to help pay for your educational expenses in the past 12 months? | C23<br>What was the value of this assistance received in the past 12 months? | C24<br>Can NAME read in any language?                                                                                | C25<br>Can NAME write in any language? |
|                                           | A.                                                                                                                                         | B.                                  | C.                                       | D.                        | E                           | F.                                                       | G.                             | H.                           | I.                               | J.                              | K.                         | L.                |                                                                                        |                                                                              |                                                                                                        |                                                                              |                                                                                                                      |                                        |
|                                           | Tuition fees<br><br>KSHS                                                                                                                   | Books & other materials<br><br>KSHS | Uniform including other clothing<br>KSHS | Boarding fees<br><br>KSHS | Transport costs<br><br>KSHS | Contribution for school building or maintainance<br>KSHS | Extra tuition fees<br><br>KSHS | Examination fees<br><br>KSHS | PTA & other related fees<br>KSHS | Pocket Money & Shopping<br>KSHS | Other Expenses<br><br>KSHS | Total<br><br>KSHS | YES ..... 1<br>NO ..... 2<br><br>(»C22)                                                | INCLUDE VALUE OF IN KIND<br><br><br><br><br><br><br><br><br><br>KSHS         | YES ..... 1<br>NO ..... 2<br><br>(»C24)                                                                | INCLUDE VALUE OF IN KIND<br><br><br><br><br><br><br><br><br><br>KSHS         | CANNOT READ AT ALL. .... 1<br>CAN READ PART OF SENTEN 2<br>CAN READ WHOLE SENTENC 3<br>NO SENTENCE IN REQUIRED LAN 4 | YES ..... 1<br>NO ..... 2              |
| 1                                         |                                                                                                                                            |                                     |                                          |                           |                             |                                                          |                                |                              |                                  |                                 |                            |                   |                                                                                        |                                                                              |                                                                                                        |                                                                              |                                                                                                                      |                                        |
| 2                                         |                                                                                                                                            |                                     |                                          |                           |                             |                                                          |                                |                              |                                  |                                 |                            |                   |                                                                                        |                                                                              |                                                                                                        |                                                                              |                                                                                                                      |                                        |
| 3                                         |                                                                                                                                            |                                     |                                          |                           |                             |                                                          |                                |                              |                                  |                                 |                            |                   |                                                                                        |                                                                              |                                                                                                        |                                                                              |                                                                                                                      |                                        |
| 4                                         |                                                                                                                                            |                                     |                                          |                           |                             |                                                          |                                |                              |                                  |                                 |                            |                   |                                                                                        |                                                                              |                                                                                                        |                                                                              |                                                                                                                      |                                        |
| 5                                         |                                                                                                                                            |                                     |                                          |                           |                             |                                                          |                                |                              |                                  |                                 |                            |                   |                                                                                        |                                                                              |                                                                                                        |                                                                              |                                                                                                                      |                                        |
| 6                                         |                                                                                                                                            |                                     |                                          |                           |                             |                                                          |                                |                              |                                  |                                 |                            |                   |                                                                                        |                                                                              |                                                                                                        |                                                                              |                                                                                                                      |                                        |
| 7                                         |                                                                                                                                            |                                     |                                          |                           |                             |                                                          |                                |                              |                                  |                                 |                            |                   |                                                                                        |                                                                              |                                                                                                        |                                                                              |                                                                                                                      |                                        |
| 8                                         |                                                                                                                                            |                                     |                                          |                           |                             |                                                          |                                |                              |                                  |                                 |                            |                   |                                                                                        |                                                                              |                                                                                                        |                                                                              |                                                                                                                      |                                        |
| 9                                         |                                                                                                                                            |                                     |                                          |                           |                             |                                                          |                                |                              |                                  |                                 |                            |                   |                                                                                        |                                                                              |                                                                                                        |                                                                              |                                                                                                                      |                                        |
| 10                                        |                                                                                                                                            |                                     |                                          |                           |                             |                                                          |                                |                              |                                  |                                 |                            |                   |                                                                                        |                                                                              |                                                                                                        |                                                                              |                                                                                                                      |                                        |
| 11                                        |                                                                                                                                            |                                     |                                          |                           |                             |                                                          |                                |                              |                                  |                                 |                            |                   |                                                                                        |                                                                              |                                                                                                        |                                                                              |                                                                                                                      |                                        |
| 12                                        |                                                                                                                                            |                                     |                                          |                           |                             |                                                          |                                |                              |                                  |                                 |                            |                   |                                                                                        |                                                                              |                                                                                                        |                                                                              |                                                                                                                      |                                        |

SECTION D: HEALTH, FERTILITY AND HOUSEHOLD DEATHS

[ASK OF ALL PERSONS IN THE HOUSEHOLD. MOTHERS OR GUARDIANS TO ANSWER FOR CHILDREN UNDER 10 YEARS OF AGE.]

|                            |                                                                                 |                                                           |                                                     |                                                    |  |                               |                                                                                                                                                          |                                                                                                       |                                                                                          |  |                                                                                                           |                                                                                                                                 |
|----------------------------|---------------------------------------------------------------------------------|-----------------------------------------------------------|-----------------------------------------------------|----------------------------------------------------|--|-------------------------------|----------------------------------------------------------------------------------------------------------------------------------------------------------|-------------------------------------------------------------------------------------------------------|------------------------------------------------------------------------------------------|--|-----------------------------------------------------------------------------------------------------------|---------------------------------------------------------------------------------------------------------------------------------|
| I<br>D<br>C<br>O<br>D<br>E | D02                                                                             | D03                                                       | D04                                                 | D05                                                |  | D06                           | D07                                                                                                                                                      | D08                                                                                                   | D09                                                                                      |  | D10                                                                                                       | D11                                                                                                                             |
|                            | ID NO. OF<br>PERSON<br>REPORTING<br>THE<br>INFORMATION<br>FOR THE<br>INDIVIDUAL | Was NAME<br>sick or<br>injured in the<br>last 4<br>weeks? | Was NAME's<br>sickness /<br>injury work<br>related? | What sort of sickness/injury did NAME suffer from? |  | Who diagnosed<br>the illness? | How many days<br>of work/school<br>did NAME miss<br>due to<br>illness/injury in<br>the last 4<br>weeks?<br><br><b>FOR PERSONS<br/>3YRS AND<br/>ABOVE</b> | Did NAME<br>consult a<br>health provider<br>on these<br>sicknesses<br>/injury in the<br>last 4 weeks? | What kind of health provider did NAME<br>visit? UP TO TWO VISITS BY ORDER<br>OF PROBLEM. |  | How many times<br>did NAME use<br>any health<br>service due to<br>sickness/injury in<br>the last 4 weeks? | Did NAME<br>visit a health<br>provider for<br>any other<br>health<br>related<br>reason (not<br>sick) in the<br>last 4<br>weeks? |
|                            |                                                                                 |                                                           |                                                     | FEVER, MALARIA ..... 01                            |  |                               |                                                                                                                                                          |                                                                                                       |                                                                                          |  |                                                                                                           |                                                                                                                                 |
|                            |                                                                                 |                                                           |                                                     | DIARRHEA ..... 02                                  |  |                               |                                                                                                                                                          |                                                                                                       |                                                                                          |  |                                                                                                           |                                                                                                                                 |
|                            |                                                                                 |                                                           |                                                     | SEXUALLY TRANSMITTED DISEASES 21                   |  |                               |                                                                                                                                                          |                                                                                                       |                                                                                          |  |                                                                                                           |                                                                                                                                 |
|                            |                                                                                 |                                                           |                                                     | STOMACH ACHE ..... 03                              |  |                               |                                                                                                                                                          |                                                                                                       |                                                                                          |  |                                                                                                           |                                                                                                                                 |
|                            |                                                                                 |                                                           |                                                     | BURN ..... 22                                      |  |                               |                                                                                                                                                          |                                                                                                       |                                                                                          |  |                                                                                                           |                                                                                                                                 |
|                            |                                                                                 |                                                           |                                                     | (DOCTOR, CLINICAL                                  |  |                               |                                                                                                                                                          |                                                                                                       |                                                                                          |  |                                                                                                           |                                                                                                                                 |
|                            |                                                                                 |                                                           |                                                     | OFFICER, NURSE) 23                                 |  |                               |                                                                                                                                                          |                                                                                                       |                                                                                          |  |                                                                                                           |                                                                                                                                 |
|                            |                                                                                 |                                                           |                                                     | AT HOSPITAL 1                                      |  |                               |                                                                                                                                                          |                                                                                                       |                                                                                          |  |                                                                                                           |                                                                                                                                 |
|                            |                                                                                 |                                                           |                                                     | MEDICAL WORKER                                     |  |                               |                                                                                                                                                          |                                                                                                       |                                                                                          |  |                                                                                                           |                                                                                                                                 |
|                            |                                                                                 |                                                           |                                                     | POISONING 25                                       |  |                               |                                                                                                                                                          |                                                                                                       |                                                                                          |  |                                                                                                           |                                                                                                                                 |
| PREGNANCY RELATED 26       |                                                                                 |                                                           |                                                     |                                                    |  |                               |                                                                                                                                                          |                                                                                                       |                                                                                          |  |                                                                                                           |                                                                                                                                 |
| AT OTHER HEALTH            |                                                                                 |                                                           |                                                     |                                                    |  |                               |                                                                                                                                                          |                                                                                                       |                                                                                          |  |                                                                                                           |                                                                                                                                 |
| FACILITY 2                 |                                                                                 |                                                           |                                                     |                                                    |  |                               |                                                                                                                                                          |                                                                                                       |                                                                                          |  |                                                                                                           |                                                                                                                                 |
| TRADITIONAL 28             |                                                                                 |                                                           |                                                     |                                                    |  |                               |                                                                                                                                                          |                                                                                                       |                                                                                          |  |                                                                                                           |                                                                                                                                 |
| HEALER 3                   |                                                                                 |                                                           |                                                     |                                                    |  |                               |                                                                                                                                                          |                                                                                                       |                                                                                          |  |                                                                                                           |                                                                                                                                 |
| NON-HH MEMBER              |                                                                                 |                                                           |                                                     |                                                    |  |                               |                                                                                                                                                          |                                                                                                       |                                                                                          |  |                                                                                                           |                                                                                                                                 |
| (NOT MEDICAL) 4            |                                                                                 |                                                           |                                                     |                                                    |  |                               |                                                                                                                                                          |                                                                                                       |                                                                                          |  |                                                                                                           |                                                                                                                                 |
| HH MEMBER 5                |                                                                                 |                                                           |                                                     |                                                    |  |                               |                                                                                                                                                          |                                                                                                       |                                                                                          |  |                                                                                                           |                                                                                                                                 |
| SELF 6                     |                                                                                 |                                                           |                                                     |                                                    |  |                               |                                                                                                                                                          |                                                                                                       |                                                                                          |  |                                                                                                           |                                                                                                                                 |
| HERBALIST 7                |                                                                                 |                                                           |                                                     |                                                    |  |                               |                                                                                                                                                          |                                                                                                       |                                                                                          |  |                                                                                                           |                                                                                                                                 |
| FAITH HEALER 8             |                                                                                 |                                                           |                                                     |                                                    |  |                               |                                                                                                                                                          |                                                                                                       |                                                                                          |  |                                                                                                           |                                                                                                                                 |
| OTHERS .(specify) 9        |                                                                                 |                                                           |                                                     |                                                    |  |                               |                                                                                                                                                          |                                                                                                       |                                                                                          |  |                                                                                                           |                                                                                                                                 |
| N/A .....99                |                                                                                 |                                                           |                                                     |                                                    |  |                               |                                                                                                                                                          |                                                                                                       |                                                                                          |  |                                                                                                           |                                                                                                                                 |
| YES..... 1                 |                                                                                 |                                                           |                                                     |                                                    |  |                               |                                                                                                                                                          |                                                                                                       |                                                                                          |  |                                                                                                           |                                                                                                                                 |
| NO ..... 2                 |                                                                                 |                                                           |                                                     |                                                    |  |                               |                                                                                                                                                          |                                                                                                       |                                                                                          |  |                                                                                                           |                                                                                                                                 |
| (IF NO »D11)               |                                                                                 |                                                           |                                                     |                                                    |  |                               |                                                                                                                                                          |                                                                                                       |                                                                                          |  |                                                                                                           |                                                                                                                                 |
| PROBLEM 1                  |                                                                                 |                                                           |                                                     |                                                    |  |                               |                                                                                                                                                          |                                                                                                       |                                                                                          |  |                                                                                                           |                                                                                                                                 |
| PROBLEM 2                  |                                                                                 |                                                           |                                                     |                                                    |  |                               |                                                                                                                                                          |                                                                                                       |                                                                                          |  |                                                                                                           |                                                                                                                                 |
| NUMBER                     |                                                                                 |                                                           |                                                     |                                                    |  |                               |                                                                                                                                                          |                                                                                                       |                                                                                          |  |                                                                                                           |                                                                                                                                 |
| (IF NO »D13)               |                                                                                 |                                                           |                                                     |                                                    |  |                               |                                                                                                                                                          |                                                                                                       |                                                                                          |  |                                                                                                           |                                                                                                                                 |
| WRITE                      |                                                                                 |                                                           |                                                     |                                                    |  |                               |                                                                                                                                                          |                                                                                                       |                                                                                          |  |                                                                                                           |                                                                                                                                 |
| MEMBER                     |                                                                                 |                                                           |                                                     |                                                    |  |                               |                                                                                                                                                          |                                                                                                       |                                                                                          |  |                                                                                                           |                                                                                                                                 |
| ID CODE                    |                                                                                 |                                                           |                                                     |                                                    |  |                               |                                                                                                                                                          |                                                                                                       |                                                                                          |  |                                                                                                           |                                                                                                                                 |
| (»D11)                     |                                                                                 |                                                           |                                                     |                                                    |  |                               |                                                                                                                                                          |                                                                                                       |                                                                                          |  |                                                                                                           |                                                                                                                                 |
| PROBLEM 1                  |                                                                                 |                                                           |                                                     |                                                    |  |                               |                                                                                                                                                          |                                                                                                       |                                                                                          |  |                                                                                                           |                                                                                                                                 |
| PROBLEM 2                  |                                                                                 |                                                           |                                                     |                                                    |  |                               |                                                                                                                                                          |                                                                                                       |                                                                                          |  |                                                                                                           |                                                                                                                                 |
| NUMBER                     |                                                                                 |                                                           |                                                     |                                                    |  |                               |                                                                                                                                                          |                                                                                                       |                                                                                          |  |                                                                                                           |                                                                                                                                 |
| (IF NO »D13)               |                                                                                 |                                                           |                                                     |                                                    |  |                               |                                                                                                                                                          |                                                                                                       |                                                                                          |  |                                                                                                           |                                                                                                                                 |
| 1                          |                                                                                 |                                                           |                                                     |                                                    |  |                               |                                                                                                                                                          |                                                                                                       |                                                                                          |  |                                                                                                           |                                                                                                                                 |
| 2                          |                                                                                 |                                                           |                                                     |                                                    |  |                               |                                                                                                                                                          |                                                                                                       |                                                                                          |  |                                                                                                           |                                                                                                                                 |
| 3                          |                                                                                 |                                                           |                                                     |                                                    |  |                               |                                                                                                                                                          |                                                                                                       |                                                                                          |  |                                                                                                           |                                                                                                                                 |
| 4                          |                                                                                 |                                                           |                                                     |                                                    |  |                               |                                                                                                                                                          |                                                                                                       |                                                                                          |  |                                                                                                           |                                                                                                                                 |
| 5                          |                                                                                 |                                                           |                                                     |                                                    |  |                               |                                                                                                                                                          |                                                                                                       |                                                                                          |  |                                                                                                           |                                                                                                                                 |
| 6                          |                                                                                 |                                                           |                                                     |                                                    |  |                               |                                                                                                                                                          |                                                                                                       |                                                                                          |  |                                                                                                           |                                                                                                                                 |
| 7                          |                                                                                 |                                                           |                                                     |                                                    |  |                               |                                                                                                                                                          |                                                                                                       |                                                                                          |  |                                                                                                           |                                                                                                                                 |
| 8                          |                                                                                 |                                                           |                                                     |                                                    |  |                               |                                                                                                                                                          |                                                                                                       |                                                                                          |  |                                                                                                           |                                                                                                                                 |
| 9                          |                                                                                 |                                                           |                                                     |                                                    |  |                               |                                                                                                                                                          |                                                                                                       |                                                                                          |  |                                                                                                           |                                                                                                                                 |
| 10                         |                                                                                 |                                                           |                                                     |                                                    |  |                               |                                                                                                                                                          |                                                                                                       |                                                                                          |  |                                                                                                           |                                                                                                                                 |
| 11                         |                                                                                 |                                                           |                                                     |                                                    |  |                               |                                                                                                                                                          |                                                                                                       |                                                                                          |  |                                                                                                           |                                                                                                                                 |
| 12                         |                                                                                 |                                                           |                                                     |                                                    |  |                               |                                                                                                                                                          |                                                                                                       |                                                                                          |  |                                                                                                           |                                                                                                                                 |

| HEALTH                     |                                                                                      |                                                                                                                    |                                                                                                 |                                                                                                  |                                                                                                                       |                                                                                                                                |                                                                                                                               |                                                                                        |                                   |                                    |                                                  |                                                             |  |
|----------------------------|--------------------------------------------------------------------------------------|--------------------------------------------------------------------------------------------------------------------|-------------------------------------------------------------------------------------------------|--------------------------------------------------------------------------------------------------|-----------------------------------------------------------------------------------------------------------------------|--------------------------------------------------------------------------------------------------------------------------------|-------------------------------------------------------------------------------------------------------------------------------|----------------------------------------------------------------------------------------|-----------------------------------|------------------------------------|--------------------------------------------------|-------------------------------------------------------------|--|
| D01                        | D12                                                                                  | D13                                                                                                                | D14                                                                                             | D15                                                                                              | D16                                                                                                                   | D17                                                                                                                            | D18                                                                                                                           | D19                                                                                    | D20                               | D21                                | D22                                              | D23                                                         |  |
| I<br>D<br>C<br>O<br>D<br>E | What kind of health provider did NAME visit? UP TO TWO PROVIDERS BY ORDER OF VISITS. | During the last <u>12 months</u> , was NAME <u>hospitalized</u> or had an overnight stay(s) in a medical facility? | Did NAME or other members of household have to borrow money inorder to pay for hospitalization? | Did NAME or other members of household have to sell assets in order to pay for hospital-ization? | During the last 12 months, did NAME stay over-night at a traditional healer's , herbalist or faith healer's dwelling? | Did NAME or other members of household have to borrow money in order to pay for traditional healer, herbalist or faith healer? | Did NAME or other members of household have to sell assets in order to pay for traditional healer, herbalist or faith healer? | Is NAME physically handicapped in any way which limits or prevents activities or work? | Was NAME's handicap work related? | Was NAME compensated for handicap? | Was NAME compensated under any of the following? | How much did NAME receive in compensation for the handicap? |  |
|                            | REFERAL HOSPITAL 01                                                                  |                                                                                                                    |                                                                                                 |                                                                                                  |                                                                                                                       |                                                                                                                                |                                                                                                                               |                                                                                        |                                   |                                    |                                                  |                                                             |  |
|                            | DISTRICT/PROVINCIAL/HOSPITAL 02                                                      |                                                                                                                    |                                                                                                 |                                                                                                  |                                                                                                                       |                                                                                                                                |                                                                                                                               |                                                                                        |                                   |                                    |                                                  |                                                             |  |
|                            | PUBLIC DISPENSARY PUBLIC 03                                                          |                                                                                                                    |                                                                                                 |                                                                                                  |                                                                                                                       |                                                                                                                                |                                                                                                                               |                                                                                        |                                   |                                    |                                                  |                                                             |  |
|                            | HEALTH CENTER 04                                                                     |                                                                                                                    |                                                                                                 |                                                                                                  |                                                                                                                       |                                                                                                                                |                                                                                                                               |                                                                                        |                                   |                                    |                                                  |                                                             |  |
|                            | PRIVATE DISPENSARY/ HOSPITAL 05                                                      |                                                                                                                    |                                                                                                 |                                                                                                  |                                                                                                                       |                                                                                                                                |                                                                                                                               |                                                                                        |                                   |                                    |                                                  |                                                             |  |
|                            | PRIVATE CLINIC 06                                                                    |                                                                                                                    |                                                                                                 |                                                                                                  |                                                                                                                       |                                                                                                                                |                                                                                                                               |                                                                                        |                                   |                                    |                                                  |                                                             |  |
|                            | TRADITIONAL HEALER 07                                                                |                                                                                                                    |                                                                                                 |                                                                                                  |                                                                                                                       |                                                                                                                                |                                                                                                                               |                                                                                        |                                   |                                    |                                                  |                                                             |  |
|                            | MISSIONARY HOSP./DISP 08                                                             |                                                                                                                    |                                                                                                 |                                                                                                  |                                                                                                                       |                                                                                                                                |                                                                                                                               |                                                                                        |                                   |                                    |                                                  |                                                             |  |
|                            | PHARMACY/CHEMIST 09                                                                  |                                                                                                                    |                                                                                                 |                                                                                                  |                                                                                                                       |                                                                                                                                |                                                                                                                               |                                                                                        |                                   |                                    |                                                  |                                                             |  |
|                            | PROVIDER 1                                                                           | PROVIDER 2                                                                                                         | (IF NO »D16)                                                                                    |                                                                                                  | (IF NO »D19)                                                                                                          |                                                                                                                                |                                                                                                                               | (IF NO »D25)                                                                           | (IF NO »D24)                      | (IF NO »D24)                       |                                                  | KSHS.                                                       |  |
| 1                          |                                                                                      |                                                                                                                    |                                                                                                 |                                                                                                  |                                                                                                                       |                                                                                                                                |                                                                                                                               |                                                                                        |                                   |                                    |                                                  |                                                             |  |
| 2                          |                                                                                      |                                                                                                                    |                                                                                                 |                                                                                                  |                                                                                                                       |                                                                                                                                |                                                                                                                               |                                                                                        |                                   |                                    |                                                  |                                                             |  |
| 3                          |                                                                                      |                                                                                                                    |                                                                                                 |                                                                                                  |                                                                                                                       |                                                                                                                                |                                                                                                                               |                                                                                        |                                   |                                    |                                                  |                                                             |  |
| 4                          |                                                                                      |                                                                                                                    |                                                                                                 |                                                                                                  |                                                                                                                       |                                                                                                                                |                                                                                                                               |                                                                                        |                                   |                                    |                                                  |                                                             |  |
| 5                          |                                                                                      |                                                                                                                    |                                                                                                 |                                                                                                  |                                                                                                                       |                                                                                                                                |                                                                                                                               |                                                                                        |                                   |                                    |                                                  |                                                             |  |
| 6                          |                                                                                      |                                                                                                                    |                                                                                                 |                                                                                                  |                                                                                                                       |                                                                                                                                |                                                                                                                               |                                                                                        |                                   |                                    |                                                  |                                                             |  |
| 7                          |                                                                                      |                                                                                                                    |                                                                                                 |                                                                                                  |                                                                                                                       |                                                                                                                                |                                                                                                                               |                                                                                        |                                   |                                    |                                                  |                                                             |  |
| 8                          |                                                                                      |                                                                                                                    |                                                                                                 |                                                                                                  |                                                                                                                       |                                                                                                                                |                                                                                                                               |                                                                                        |                                   |                                    |                                                  |                                                             |  |
| 9                          |                                                                                      |                                                                                                                    |                                                                                                 |                                                                                                  |                                                                                                                       |                                                                                                                                |                                                                                                                               |                                                                                        |                                   |                                    |                                                  |                                                             |  |
| 10                         |                                                                                      |                                                                                                                    |                                                                                                 |                                                                                                  |                                                                                                                       |                                                                                                                                |                                                                                                                               |                                                                                        |                                   |                                    |                                                  |                                                             |  |
| 11                         |                                                                                      |                                                                                                                    |                                                                                                 |                                                                                                  |                                                                                                                       |                                                                                                                                |                                                                                                                               |                                                                                        |                                   |                                    |                                                  |                                                             |  |
| 12                         |                                                                                      |                                                                                                                    |                                                                                                 |                                                                                                  |                                                                                                                       |                                                                                                                                |                                                                                                                               |                                                                                        |                                   |                                    |                                                  |                                                             |  |



| FERTILITY                      |                                                                                                                                                                               |                                           |                                         |       |                                                                          |       |                                                                   |       |                                                       |       |                                  |       |                             |                                           |                     |                              |   |
|--------------------------------|-------------------------------------------------------------------------------------------------------------------------------------------------------------------------------|-------------------------------------------|-----------------------------------------|-------|--------------------------------------------------------------------------|-------|-------------------------------------------------------------------|-------|-------------------------------------------------------|-------|----------------------------------|-------|-----------------------------|-------------------------------------------|---------------------|------------------------------|---|
| D01                            | D33                                                                                                                                                                           | D34                                       | D35                                     |       | D36                                                                      |       | D37                                                               |       | D38                                                   |       | D39                              |       | D40                         | D41                                       |                     |                              |   |
| I<br>D<br><br>C<br>O<br>D<br>E | PUT A '1' FOR ALL FEMALES WHO ARE AGED LESS THAN 12 YRS AND MORE THAN 49YRS AND ALL MALES, OTHERWISE CODE 2.<br><br>DO NOT ADMINISTER THIS MODULE TO ALL INDIVIDUALS CODED 1. | Has NAME ever given birth to live births? | How many children have you borne alive? |       | How many children has NAME borne alive who usually live in the household |       | How many children has NAME borne alive who usually live elsewhere |       | How many children has NAME borne alive who have died? |       | When was NAME's last child born? |       | Sex of last child(ren) born | Is this last born child(ren) still alive? |                     |                              |   |
|                                |                                                                                                                                                                               | YES                                       | 1                                       |       |                                                                          |       |                                                                   |       |                                                       |       |                                  |       |                             | MALE                                      | 1 YES               | 1                            |   |
|                                |                                                                                                                                                                               | NO                                        | 2                                       |       |                                                                          |       |                                                                   |       |                                                       |       |                                  |       |                             | FEMALE                                    | 2 NO                | 2                            |   |
|                                |                                                                                                                                                                               | (IF NO »D42)                              |                                         | MALES | FEMALES                                                                  | MALES | FEMALES                                                           | MALES | FEMALES                                               | MALES | FEMALES                          | MONTH | YEAR                        |                                           | MALE TWINS          | 3 ONE OF THE TWINS           | 3 |
|                                |                                                                                                                                                                               |                                           |                                         |       |                                                                          |       |                                                                   |       |                                                       |       |                                  |       |                             |                                           | FEMALE TWINS        | 4 TWO OF THE MULTIPLE BIRTHS | 4 |
|                                |                                                                                                                                                                               |                                           |                                         |       |                                                                          |       |                                                                   |       |                                                       |       |                                  |       |                             |                                           | MULTIPLE BIRTHS     | 5 ONE OF THE MULTIPLE BIRTHS | 5 |
|                                |                                                                                                                                                                               |                                           |                                         |       |                                                                          |       |                                                                   |       |                                                       |       |                                  |       |                             |                                           | MALE - FEMALE TWIN: | 6 DK                         | 8 |
|                                |                                                                                                                                                                               |                                           |                                         |       |                                                                          |       |                                                                   |       |                                                       |       |                                  |       |                             |                                           |                     |                              |   |
|                                |                                                                                                                                                                               |                                           |                                         |       |                                                                          |       |                                                                   |       |                                                       |       |                                  |       |                             |                                           |                     |                              |   |
|                                |                                                                                                                                                                               |                                           |                                         |       |                                                                          |       |                                                                   |       |                                                       |       |                                  |       |                             |                                           |                     |                              |   |
| 1                              |                                                                                                                                                                               |                                           |                                         |       |                                                                          |       |                                                                   |       |                                                       |       |                                  |       |                             |                                           |                     |                              |   |
| 2                              |                                                                                                                                                                               |                                           |                                         |       |                                                                          |       |                                                                   |       |                                                       |       |                                  |       |                             |                                           |                     |                              |   |
| 3                              |                                                                                                                                                                               |                                           |                                         |       |                                                                          |       |                                                                   |       |                                                       |       |                                  |       |                             |                                           |                     |                              |   |
| 4                              |                                                                                                                                                                               |                                           |                                         |       |                                                                          |       |                                                                   |       |                                                       |       |                                  |       |                             |                                           |                     |                              |   |
| 5                              |                                                                                                                                                                               |                                           |                                         |       |                                                                          |       |                                                                   |       |                                                       |       |                                  |       |                             |                                           |                     |                              |   |
| 6                              |                                                                                                                                                                               |                                           |                                         |       |                                                                          |       |                                                                   |       |                                                       |       |                                  |       |                             |                                           |                     |                              |   |
| 7                              |                                                                                                                                                                               |                                           |                                         |       |                                                                          |       |                                                                   |       |                                                       |       |                                  |       |                             |                                           |                     |                              |   |
| 8                              |                                                                                                                                                                               |                                           |                                         |       |                                                                          |       |                                                                   |       |                                                       |       |                                  |       |                             |                                           |                     |                              |   |
| 9                              |                                                                                                                                                                               |                                           |                                         |       |                                                                          |       |                                                                   |       |                                                       |       |                                  |       |                             |                                           |                     |                              |   |
| 10                             |                                                                                                                                                                               |                                           |                                         |       |                                                                          |       |                                                                   |       |                                                       |       |                                  |       |                             |                                           |                     |                              |   |
| 11                             |                                                                                                                                                                               |                                           |                                         |       |                                                                          |       |                                                                   |       |                                                       |       |                                  |       |                             |                                           |                     |                              |   |
| 12                             |                                                                                                                                                                               |                                           |                                         |       |                                                                          |       |                                                                   |       |                                                       |       |                                  |       |                             |                                           |                     |                              |   |

| DEATHS IN THE HOUSEHOLD        |                                                                                                    |                        |                        |               |                |                      |
|--------------------------------|----------------------------------------------------------------------------------------------------|------------------------|------------------------|---------------|----------------|----------------------|
| D01                            | D42                                                                                                | D43                    | D44                    |               | D45            | D46                  |
| I<br>D<br><br>C<br>O<br>D<br>E | In the last 24 months has any household member died? (ask HH head or any other responsible member) | Sex of person who died | Age of person who died |               | Cause of Death | Where did NAME die ? |
|                                |                                                                                                    |                        |                        |               |                |                      |
|                                |                                                                                                    |                        |                        |               |                |                      |
|                                |                                                                                                    |                        |                        |               |                |                      |
|                                |                                                                                                    |                        |                        |               |                |                      |
|                                |                                                                                                    |                        |                        |               |                |                      |
|                                |                                                                                                    |                        |                        |               |                |                      |
|                                |                                                                                                    |                        |                        |               |                |                      |
|                                |                                                                                                    |                        |                        |               |                |                      |
|                                |                                                                                                    |                        |                        |               |                |                      |
| YES                            | 1                                                                                                  | MALE                   | 1                      | OVER 97 YEARS | 97             |                      |
| NO                             | 2                                                                                                  | FEMALE                 | 2                      | DON'T KNOW    | 98             |                      |
| (NEXT SECTION)                 |                                                                                                    | NOT STATED             |                        | 99            |                |                      |
|                                |                                                                                                    | YEARS                  | MONTHS                 |               |                |                      |
| 1                              |                                                                                                    |                        |                        |               |                |                      |
| 2                              |                                                                                                    |                        |                        |               |                |                      |
| 3                              |                                                                                                    |                        |                        |               |                |                      |
| 4                              |                                                                                                    |                        |                        |               |                |                      |
| 5                              |                                                                                                    |                        |                        |               |                |                      |
| 6                              |                                                                                                    |                        |                        |               |                |                      |
| 7                              |                                                                                                    |                        |                        |               |                |                      |
| 8                              |                                                                                                    |                        |                        |               |                |                      |
| 9                              |                                                                                                    |                        |                        |               |                |                      |
| 10                             |                                                                                                    |                        |                        |               |                |                      |
| 11                             |                                                                                                    |                        |                        |               |                |                      |
| 12                             |                                                                                                    |                        |                        |               |                |                      |

## DEATHS IN THE HOUSEHOLD

14

SECTION E: LABOUR

[ASK ALL HOUSEHOLD MEMBERS AGED 5 YEARS AND OLDER.] IF DID NOT DO TASK, WRITE ZERO; LESS THAN 1/2 HOUR, WRITE '0.5';

|                            |                                                                                                       |                                                   |                                |                                                     |                                                        |                                                        |                                                                                                                                                  |                                                                                                                                                                                                                |                                                                                                                                                                                                        |                                                                                                                                                                     |                                                                                    |                                                                                 |                                                                                                                                                 |
|----------------------------|-------------------------------------------------------------------------------------------------------|---------------------------------------------------|--------------------------------|-----------------------------------------------------|--------------------------------------------------------|--------------------------------------------------------|--------------------------------------------------------------------------------------------------------------------------------------------------|----------------------------------------------------------------------------------------------------------------------------------------------------------------------------------------------------------------|--------------------------------------------------------------------------------------------------------------------------------------------------------------------------------------------------------|---------------------------------------------------------------------------------------------------------------------------------------------------------------------|------------------------------------------------------------------------------------|---------------------------------------------------------------------------------|-------------------------------------------------------------------------------------------------------------------------------------------------|
| E01                        | E02                                                                                                   | E03                                               | E04                            | E05                                                 | E06                                                    | E07                                                    | E08                                                                                                                                              | E09                                                                                                                                                                                                            | E10                                                                                                                                                                                                    | E11                                                                                                                                                                 | E12                                                                                | E13                                                                             | E14                                                                                                                                             |
| I<br>D<br>C<br>O<br>D<br>E | PUT CODE '1'<br>FOR ALL<br>INDIVIDUALS<br>WHO ARE AGED<br>LESS THAN 5<br>YEARS<br>OTHERWISE<br>CODE 2 | What was NAME mainly doing in the<br>past 7 days? | Status in employment<br>(Main) | During the<br>past 7 days,<br>how many<br>hours was | During the<br>past 7<br>days, how<br>many<br>hours did | During the<br>past 7<br>days, how<br>many<br>hours did | REVIEW<br>QUESTIONS<br>E05, E06 E07:<br>DID THE<br>RESPONDENT<br>WORK FOR<br>ANY HOURS<br>IN ANY OF<br>THESE TASKS<br>DURING THE<br>LAST 7 DAYS? | Even though<br>NAME did<br>not do any<br>income<br>earning<br>activities in<br>the last 7<br>days, does<br>NAME have<br>a job,<br>business, or<br>other<br>economic or<br>farming<br>activity to<br>return to? | What is the main reason NAME<br>was not working during the last 7<br>days?                                                                                                                             | In the past 4<br>weeks has<br>NAME taken<br>any action to<br>look for any<br>kind of work or<br>start any kind<br>of<br>business/inco<br>me generating<br>activity? | If NAME was<br>offered a job,<br>would NAME<br>be willing to<br>accept the<br>job? | How many income<br>earning activities<br>did NAME engage<br>in the last 7 days? | In the past 12<br>months, was<br>NAME<br>employed for a<br>wage, salary,<br>commission or<br>any payment in<br>kind, excluding<br>casual labor? |
|                            |                                                                                                       | WORKED FOR PAY 01                                 | PAID EMPLOYEE 1                | NAME 1                                              | NAME 1                                                 | NAME 1                                                 |                                                                                                                                                  |                                                                                                                                                                                                                |                                                                                                                                                                                                        |                                                                                                                                                                     |                                                                                    |                                                                                 |                                                                                                                                                 |
|                            |                                                                                                       | ON LEAVE 02                                       | WORKING EMPLOYER 2             | employed for 2                                      |                                                        |                                                        |                                                                                                                                                  |                                                                                                                                                                                                                |                                                                                                                                                                                                        |                                                                                                                                                                     |                                                                                    |                                                                                 |                                                                                                                                                 |
|                            |                                                                                                       | SICK LEAVE 03                                     | OWN-ACCOUNT WORKE 3            | a wage, 3                                           | work on 3                                              | work on 3                                              |                                                                                                                                                  |                                                                                                                                                                                                                |                                                                                                                                                                                                        |                                                                                                                                                                     |                                                                                    |                                                                                 |                                                                                                                                                 |
|                            |                                                                                                       | WORKED ON OWN/FAMILY BUSINESS 04                  | UNPAID FAMILY WORKE 4          | salary, 4                                           | the 4                                                  | any 4                                                  |                                                                                                                                                  |                                                                                                                                                                                                                |                                                                                                                                                                                                        |                                                                                                                                                                     |                                                                                    |                                                                                 |                                                                                                                                                 |
|                            |                                                                                                       | WORKED ON OWN/FAMILY AGRI.HOLDI 05                | APPRENTICE 5                   | commission 5                                        | household 5                                            | enterprise 5                                           |                                                                                                                                                  |                                                                                                                                                                                                                |                                                                                                                                                                                                        |                                                                                                                                                                     |                                                                                    |                                                                                 |                                                                                                                                                 |
|                            |                                                                                                       | SEEKING WORK 06                                   | OTHER (SPECIFY 6               | or any 6                                            | farm, in a 6                                           | belonging 6                                            |                                                                                                                                                  |                                                                                                                                                                                                                |                                                                                                                                                                                                        |                                                                                                                                                                     |                                                                                    |                                                                                 |                                                                                                                                                 |
|                            |                                                                                                       | DOING NOTHING 07                                  |                                | payment in 7                                        | field or 7                                             | to a 7                                                 |                                                                                                                                                  |                                                                                                                                                                                                                |                                                                                                                                                                                                        |                                                                                                                                                                     |                                                                                    |                                                                                 |                                                                                                                                                 |
|                            |                                                                                                       | RETIRED 08                                        |                                | kind? 8                                             | herding 8                                              | member of 8                                            |                                                                                                                                                  |                                                                                                                                                                                                                |                                                                                                                                                                                                        |                                                                                                                                                                     |                                                                                    |                                                                                 |                                                                                                                                                 |
|                            |                                                                                                       | HOMEMAKER 09                                      |                                |                                                     | livestock? 9                                           | household, 9                                           |                                                                                                                                                  |                                                                                                                                                                                                                |                                                                                                                                                                                                        |                                                                                                                                                                     |                                                                                    |                                                                                 |                                                                                                                                                 |
|                            |                                                                                                       | FULL-TIME STUDENT 10                              |                                |                                                     |                                                        | including 10                                           |                                                                                                                                                  |                                                                                                                                                                                                                |                                                                                                                                                                                                        |                                                                                                                                                                     |                                                                                    |                                                                                 |                                                                                                                                                 |
|                            |                                                                                                       | IN CAPACITATED 11                                 |                                |                                                     |                                                        | helping for 11                                         |                                                                                                                                                  |                                                                                                                                                                                                                |                                                                                                                                                                                                        |                                                                                                                                                                     |                                                                                    |                                                                                 |                                                                                                                                                 |
|                            | OTHER (SPECIFY) 12                                                                                    |                                                   |                                |                                                     | no pay? 12                                             |                                                        |                                                                                                                                                  |                                                                                                                                                                                                                |                                                                                                                                                                                                        |                                                                                                                                                                     |                                                                                    |                                                                                 |                                                                                                                                                 |
|                            |                                                                                                       |                                                   |                                | HOURS                                               | HOURS                                                  | HOURS                                                  | YES 1<br>NO 2                                                                                                                                    | YES 1<br>NO 2                                                                                                                                                                                                  | SICK 01<br>RETIRED 02<br>LOOKING FOR WORK 03<br>OUT OF SEASON 04<br>RETRENCHMENT/REDUNDANCY 05<br>TEMPORARY LAY OFF 06<br>DONT NEED WORK 07<br>BUSINESS CLOSED 08<br>TOO YOUNG/TOO OLD 09<br>OTHERS 10 |                                                                                                                                                                     | YES 1<br>NO 2                                                                      |                                                                                 | YES 1<br>NO 2                                                                                                                                   |
|                            |                                                                                                       |                                                   |                                |                                                     |                                                        |                                                        |                                                                                                                                                  |                                                                                                                                                                                                                |                                                                                                                                                                                                        |                                                                                                                                                                     |                                                                                    |                                                                                 |                                                                                                                                                 |
| 1                          |                                                                                                       |                                                   |                                |                                                     |                                                        |                                                        |                                                                                                                                                  |                                                                                                                                                                                                                |                                                                                                                                                                                                        |                                                                                                                                                                     |                                                                                    |                                                                                 |                                                                                                                                                 |
| 2                          |                                                                                                       |                                                   |                                |                                                     |                                                        |                                                        |                                                                                                                                                  |                                                                                                                                                                                                                |                                                                                                                                                                                                        |                                                                                                                                                                     |                                                                                    |                                                                                 |                                                                                                                                                 |
| 3                          |                                                                                                       |                                                   |                                |                                                     |                                                        |                                                        |                                                                                                                                                  |                                                                                                                                                                                                                |                                                                                                                                                                                                        |                                                                                                                                                                     |                                                                                    |                                                                                 |                                                                                                                                                 |
| 4                          |                                                                                                       |                                                   |                                |                                                     |                                                        |                                                        |                                                                                                                                                  |                                                                                                                                                                                                                |                                                                                                                                                                                                        |                                                                                                                                                                     |                                                                                    |                                                                                 |                                                                                                                                                 |
| 5                          |                                                                                                       |                                                   |                                |                                                     |                                                        |                                                        |                                                                                                                                                  |                                                                                                                                                                                                                |                                                                                                                                                                                                        |                                                                                                                                                                     |                                                                                    |                                                                                 |                                                                                                                                                 |
| 6                          |                                                                                                       |                                                   |                                |                                                     |                                                        |                                                        |                                                                                                                                                  |                                                                                                                                                                                                                |                                                                                                                                                                                                        |                                                                                                                                                                     |                                                                                    |                                                                                 |                                                                                                                                                 |
| 7                          |                                                                                                       |                                                   |                                |                                                     |                                                        |                                                        |                                                                                                                                                  |                                                                                                                                                                                                                |                                                                                                                                                                                                        |                                                                                                                                                                     |                                                                                    |                                                                                 |                                                                                                                                                 |
| 8                          |                                                                                                       |                                                   |                                |                                                     |                                                        |                                                        |                                                                                                                                                  |                                                                                                                                                                                                                |                                                                                                                                                                                                        |                                                                                                                                                                     |                                                                                    |                                                                                 |                                                                                                                                                 |
| 9                          |                                                                                                       |                                                   |                                |                                                     |                                                        |                                                        |                                                                                                                                                  |                                                                                                                                                                                                                |                                                                                                                                                                                                        |                                                                                                                                                                     |                                                                                    |                                                                                 |                                                                                                                                                 |
| 10                         |                                                                                                       |                                                   |                                |                                                     |                                                        |                                                        |                                                                                                                                                  |                                                                                                                                                                                                                |                                                                                                                                                                                                        |                                                                                                                                                                     |                                                                                    |                                                                                 |                                                                                                                                                 |
| 11                         |                                                                                                       |                                                   |                                |                                                     |                                                        |                                                        |                                                                                                                                                  |                                                                                                                                                                                                                |                                                                                                                                                                                                        |                                                                                                                                                                     |                                                                                    |                                                                                 |                                                                                                                                                 |
| 12                         |                                                                                                       |                                                   |                                |                                                     |                                                        |                                                        |                                                                                                                                                  |                                                                                                                                                                                                                |                                                                                                                                                                                                        |                                                                                                                                                                     |                                                                                    |                                                                                 |                                                                                                                                                 |

| E01<br><br>I<br>D<br><br>C<br>O<br>D<br>E | E15                                                                                                                                                                       |                                     | E16                                                                                                    |                                     | E17                                                                                                                                                                                                                                    | E18                                                                         | E19                                                                                                  | E20                                                                                                                              |
|-------------------------------------------|---------------------------------------------------------------------------------------------------------------------------------------------------------------------------|-------------------------------------|--------------------------------------------------------------------------------------------------------|-------------------------------------|----------------------------------------------------------------------------------------------------------------------------------------------------------------------------------------------------------------------------------------|-----------------------------------------------------------------------------|------------------------------------------------------------------------------------------------------|----------------------------------------------------------------------------------------------------------------------------------|
|                                           | Describe NAME's employed occupation if worked in the last 7 days. For those who did not work during the last 7 days but worked during last 12 months give main occupation |                                     | Describe what <u>kind of business</u> is NAME's main occupation connected with, i.e. TYPE OF INDUSTRY? |                                     | Who was NAME's main <u>employer</u> for main occupation in the last 12 months<br>READ ALL RESPONSES                                                                                                                                    | For how many COMPLETE D months did NAME do this work during last 12 months? | For how many <u>hours per day</u> does NAME normally do this work, excluding lunch and other breaks? | How much was NAME's <u>payment for wages</u> and salary last one month (basic salary)?<br><br>IF NOT YET PAID, EXPECTED PAYMENT. |
|                                           | KNOCS CODES TO BE USED FOR THIS COLUMN                                                                                                                                    |                                     | ISIC REV 2 CODES TO BE USED FOR THIS COLUMN                                                            |                                     | PRIVATE SECTOR COMPANY 01<br>INDIVIDUAL 02<br>GOVERNMENT (local auth.) 03<br>GOVERNMENT (central) 04<br>T.S.C 05<br>MAJORITY CONTROL by GOK 06<br>INTERNATIONAL ORGs. 07<br>STATE-OWNED ENTERPRISE 08<br>NGOs 09<br>OTHER (specify) 10 |                                                                             |                                                                                                      |                                                                                                                                  |
|                                           | DESCRIPTION                                                                                                                                                               | CODE BY SUPERVISOR<br>3 DIGIT CODES | DESCRIPTION                                                                                            | CODE BY SUPERVISOR<br>4 DIGIT CODES |                                                                                                                                                                                                                                        | NUMBER                                                                      | HOURS                                                                                                | KSHS                                                                                                                             |
|                                           |                                                                                                                                                                           |                                     |                                                                                                        |                                     |                                                                                                                                                                                                                                        |                                                                             |                                                                                                      |                                                                                                                                  |
| 1                                         |                                                                                                                                                                           |                                     |                                                                                                        |                                     |                                                                                                                                                                                                                                        |                                                                             |                                                                                                      |                                                                                                                                  |
| 2                                         |                                                                                                                                                                           |                                     |                                                                                                        |                                     |                                                                                                                                                                                                                                        |                                                                             |                                                                                                      |                                                                                                                                  |
| 3                                         |                                                                                                                                                                           |                                     |                                                                                                        |                                     |                                                                                                                                                                                                                                        |                                                                             |                                                                                                      |                                                                                                                                  |
| 4                                         |                                                                                                                                                                           |                                     |                                                                                                        |                                     |                                                                                                                                                                                                                                        |                                                                             |                                                                                                      |                                                                                                                                  |
| 5                                         |                                                                                                                                                                           |                                     |                                                                                                        |                                     |                                                                                                                                                                                                                                        |                                                                             |                                                                                                      |                                                                                                                                  |
| 6                                         |                                                                                                                                                                           |                                     |                                                                                                        |                                     |                                                                                                                                                                                                                                        |                                                                             |                                                                                                      |                                                                                                                                  |
| 7                                         |                                                                                                                                                                           |                                     |                                                                                                        |                                     |                                                                                                                                                                                                                                        |                                                                             |                                                                                                      |                                                                                                                                  |
| 8                                         |                                                                                                                                                                           |                                     |                                                                                                        |                                     |                                                                                                                                                                                                                                        |                                                                             |                                                                                                      |                                                                                                                                  |
| 9                                         |                                                                                                                                                                           |                                     |                                                                                                        |                                     |                                                                                                                                                                                                                                        |                                                                             |                                                                                                      |                                                                                                                                  |
| 10                                        |                                                                                                                                                                           |                                     |                                                                                                        |                                     |                                                                                                                                                                                                                                        |                                                                             |                                                                                                      |                                                                                                                                  |
| 11                                        |                                                                                                                                                                           |                                     |                                                                                                        |                                     |                                                                                                                                                                                                                                        |                                                                             |                                                                                                      |                                                                                                                                  |
| 12                                        |                                                                                                                                                                           |                                     |                                                                                                        |                                     |                                                                                                                                                                                                                                        |                                                                             |                                                                                                      |                                                                                                                                  |

|                            |                                                                                                                                       |                                                                                                                                  |                                                                                                                                                                                        |                                                                                                                                                |                                                                           |                                                                                                                                                                                |                                                                     |                                   |                                                                                                                                                                                              |                                                    |        |                                                                                                                    |
|----------------------------|---------------------------------------------------------------------------------------------------------------------------------------|----------------------------------------------------------------------------------------------------------------------------------|----------------------------------------------------------------------------------------------------------------------------------------------------------------------------------------|------------------------------------------------------------------------------------------------------------------------------------------------|---------------------------------------------------------------------------|--------------------------------------------------------------------------------------------------------------------------------------------------------------------------------|---------------------------------------------------------------------|-----------------------------------|----------------------------------------------------------------------------------------------------------------------------------------------------------------------------------------------|----------------------------------------------------|--------|--------------------------------------------------------------------------------------------------------------------|
| E01                        | E21                                                                                                                                   | E22                                                                                                                              | E23                                                                                                                                                                                    | E24                                                                                                                                            | E25                                                                       | E26                                                                                                                                                                            | E27                                                                 | E28                               | E29                                                                                                                                                                                          | E30                                                |        | E31                                                                                                                |
| I<br>D<br>C<br>O<br>D<br>E | How much does NAME usually receive in House <u>Allowances</u> that were not included in the salary NAME just reported last one month? | How much does NAME usually receive in Medical Allowances that were not included in the salary NAME just reported last one month? | How much does NAME usually receive in Other Allowances that were not included in the salary NAME just reported last one month? - ESTIMATE CASH VALUE OF ANY IN-KIND PAYMENTS RECEIVED. | At any time over past 12 months, did NAME engage in casual, part-time, <u>labour</u> for anyone who is <u>not a member of your household</u> ? | For how many total days did NAME do casual labour over the past 3 months? | What was the <u>average daily wage</u> NAME received for the days worked at casual labour over the past 3 months?<br><br>ESTIMATE CASH VALUE OF ANY IN-KIND PAYMENTS RECEIVED. | Is NAME a member of a trade union or member of welfare association? | In which district does NAME work? | How does NAME travel to and from work most of the time?<br><br>WALK 1<br>BICYCLE 2<br>MATATU 3<br>BUS 4<br>COMMUTER TRAIN 5<br>EMPLOYER PROVIDED 6<br>PRIVATE VEHICLE 7<br>OTHER (specify) 8 | How many minutes does NAME take to travel to work? |        | Ask Household Head or a responsible member of the household: how many domestic servants does the household employ? |
|                            |                                                                                                                                       |                                                                                                                                  |                                                                                                                                                                                        | YES 1<br>NO 2                                                                                                                                  |                                                                           |                                                                                                                                                                                | YES 1<br>NO 2                                                       | GIVE<br>CODE                      |                                                                                                                                                                                              |                                                    |        |                                                                                                                    |
|                            | KSHS                                                                                                                                  | KSHS                                                                                                                             | »E27<br>KSHS                                                                                                                                                                           | »E31                                                                                                                                           | DAYS                                                                      | KSHS                                                                                                                                                                           |                                                                     |                                   | PEAK                                                                                                                                                                                         | OFF-PEAK                                           | NUMBER |                                                                                                                    |
|                            |                                                                                                                                       |                                                                                                                                  |                                                                                                                                                                                        |                                                                                                                                                |                                                                           |                                                                                                                                                                                |                                                                     |                                   |                                                                                                                                                                                              |                                                    |        |                                                                                                                    |
| 1                          |                                                                                                                                       |                                                                                                                                  |                                                                                                                                                                                        |                                                                                                                                                |                                                                           |                                                                                                                                                                                |                                                                     |                                   |                                                                                                                                                                                              |                                                    |        |                                                                                                                    |
| 2                          |                                                                                                                                       |                                                                                                                                  |                                                                                                                                                                                        |                                                                                                                                                |                                                                           |                                                                                                                                                                                |                                                                     |                                   |                                                                                                                                                                                              |                                                    |        |                                                                                                                    |
| 3                          |                                                                                                                                       |                                                                                                                                  |                                                                                                                                                                                        |                                                                                                                                                |                                                                           |                                                                                                                                                                                |                                                                     |                                   |                                                                                                                                                                                              |                                                    |        |                                                                                                                    |
| 4                          |                                                                                                                                       |                                                                                                                                  |                                                                                                                                                                                        |                                                                                                                                                |                                                                           |                                                                                                                                                                                |                                                                     |                                   |                                                                                                                                                                                              |                                                    |        |                                                                                                                    |
| 5                          |                                                                                                                                       |                                                                                                                                  |                                                                                                                                                                                        |                                                                                                                                                |                                                                           |                                                                                                                                                                                |                                                                     |                                   |                                                                                                                                                                                              |                                                    |        |                                                                                                                    |
| 6                          |                                                                                                                                       |                                                                                                                                  |                                                                                                                                                                                        |                                                                                                                                                |                                                                           |                                                                                                                                                                                |                                                                     |                                   |                                                                                                                                                                                              |                                                    |        |                                                                                                                    |
| 7                          |                                                                                                                                       |                                                                                                                                  |                                                                                                                                                                                        |                                                                                                                                                |                                                                           |                                                                                                                                                                                |                                                                     |                                   |                                                                                                                                                                                              |                                                    |        |                                                                                                                    |
| 8                          |                                                                                                                                       |                                                                                                                                  |                                                                                                                                                                                        |                                                                                                                                                |                                                                           |                                                                                                                                                                                |                                                                     |                                   |                                                                                                                                                                                              |                                                    |        |                                                                                                                    |
| 9                          |                                                                                                                                       |                                                                                                                                  |                                                                                                                                                                                        |                                                                                                                                                |                                                                           |                                                                                                                                                                                |                                                                     |                                   |                                                                                                                                                                                              |                                                    |        |                                                                                                                    |
| 10                         |                                                                                                                                       |                                                                                                                                  |                                                                                                                                                                                        |                                                                                                                                                |                                                                           |                                                                                                                                                                                |                                                                     |                                   |                                                                                                                                                                                              |                                                    |        |                                                                                                                    |
| 11                         |                                                                                                                                       |                                                                                                                                  |                                                                                                                                                                                        |                                                                                                                                                |                                                                           |                                                                                                                                                                                |                                                                     |                                   |                                                                                                                                                                                              |                                                    |        |                                                                                                                    |
| 12                         |                                                                                                                                       |                                                                                                                                  |                                                                                                                                                                                        |                                                                                                                                                |                                                                           |                                                                                                                                                                                |                                                                     |                                   |                                                                                                                                                                                              |                                                    |        |                                                                                                                    |

SECTION F: CHILD HEALTH AND ANTHROPOMETRY  
[FOR CHILDREN 0 TO 60 MONTHS. MOTHERS OR GUARDIANS TO ANSWER FOR CHILDREN]

|                                                                                                       |                                                                                                               |                              |                                      |                                   |                                     |                                        |                                                                    |                                                                                                                                                                                                     |                                                                             |                                                                 |                                                      |                                                             |                         |                  |
|-------------------------------------------------------------------------------------------------------|---------------------------------------------------------------------------------------------------------------|------------------------------|--------------------------------------|-----------------------------------|-------------------------------------|----------------------------------------|--------------------------------------------------------------------|-----------------------------------------------------------------------------------------------------------------------------------------------------------------------------------------------------|-----------------------------------------------------------------------------|-----------------------------------------------------------------|------------------------------------------------------|-------------------------------------------------------------|-------------------------|------------------|
| F01                                                                                                   | F02                                                                                                           | F03                          | F04                                  | F05                               | F06                                 | F07                                    | F08                                                                | F09                                                                                                                                                                                                 | F10                                                                         | F11                                                             | F12                                                  | F13                                                         |                         |                  |
| I<br>D<br>C<br>O<br>D<br>E<br><br>DO NOT<br>ADMINISTER<br>THIS MODULE<br>TO<br>INDIVIDUALS<br>CODED 1 | PUT CODE '1'<br>FOR ALL<br>INDIVIDUALS<br>WHO ARE<br>MORE THAN<br>60 MONTHS<br>IN AGE.<br>OTHERWISE<br>CODE 2 | Where was NAME<br>delivered? | Who assisted<br>in birth of<br>NAME? | Has<br>NAME<br>ever<br>breastfed? | Is NAME<br>still breast<br>feeding? | For how long<br>was NAME<br>breastfed? | For how<br>many<br>months was<br>NAME<br>exclusively<br>breastfed? | What FIRST supplement<br>was NAME given?<br><br>MILK OTHER THAN BREAST1<br>COMMERCIAL INFANT<br>FOOD/FORMULA 2<br>PORRIDGE 3<br>FORTIFIED PORRIDGE 4<br>SEMI-SOLIDS 5<br>WATER 6<br>OTHER 7<br>NA 8 | Has NAME ever<br>participated in<br>any community<br>nutrition<br>programs? | Has NAME<br>participated in the<br>Growth Monitoring<br>Clinic? | Has NAME<br>had diarrhoea<br>in the last 2<br>weeks? | What type of fluid/food was NAME given<br>during diarrhoea? |                         |                  |
|                                                                                                       |                                                                                                               | HOSPITAL 1                   | DOCTOR 1                             |                                   |                                     |                                        |                                                                    |                                                                                                                                                                                                     |                                                                             |                                                                 |                                                      |                                                             | NOTHING 1               | NOTHING 1        |
|                                                                                                       |                                                                                                               | HEALTH CENTRE 2              | MIDWIFE/NURSE 2                      |                                   |                                     |                                        |                                                                    |                                                                                                                                                                                                     |                                                                             |                                                                 |                                                      |                                                             | COMMERCIAL INFANT/      | BREASTMILK 2     |
|                                                                                                       |                                                                                                               | CLINIC/ DISPENSARY 3         | TBA 3                                |                                   |                                     |                                        | DK=98                                                              |                                                                                                                                                                                                     |                                                                             |                                                                 |                                                      |                                                             | FOOD/FORMULA/YOGURT 2   | PORRIDGE (UJI) 3 |
|                                                                                                       |                                                                                                               | MATERNITY HOME 4             | TTBA 4                               | YES 1                             | YES 1                               |                                        |                                                                    |                                                                                                                                                                                                     |                                                                             |                                                                 |                                                      |                                                             | OTHER SEMI-SOLID FOOD 3 | WATER ALONE 4    |
|                                                                                                       |                                                                                                               | AT HOME 5                    | SELF 5                               | NO 2                              | NO 2                                |                                        |                                                                    |                                                                                                                                                                                                     |                                                                             |                                                                 |                                                      |                                                             | FRUITS 4                | MILK OTHER THAN  |
|                                                                                                       |                                                                                                               | OTHER 6                      | OTHER 6                              | ( »F09)                           |                                     |                                        |                                                                    |                                                                                                                                                                                                     |                                                                             |                                                                 |                                                      | YES 1                                                       | OTHER (SPECIFY) 5       | BREASTMILK 5     |
|                                                                                                       |                                                                                                               | DK 9                         | DK 7                                 | DK 8                              |                                     |                                        | COMPLETED                                                          | COMPLETED                                                                                                                                                                                           | OTHER 7                                                                     | YES 1                                                           | YES 1                                                | NO 2                                                        | OTHER (SPECIFY) 6       |                  |
|                                                                                                       |                                                                                                               |                              |                                      |                                   | ( »F09)                             |                                        | MONTHS                                                             | MONTHS                                                                                                                                                                                              | NA 8                                                                        | NO 2                                                            | NO 2                                                 | ( »F16)                                                     | FOOD                    | FLUID            |
|                                                                                                       | 1                                                                                                             |                              |                                      |                                   |                                     |                                        |                                                                    |                                                                                                                                                                                                     |                                                                             |                                                                 |                                                      |                                                             |                         |                  |
| 2                                                                                                     |                                                                                                               |                              |                                      |                                   |                                     |                                        |                                                                    |                                                                                                                                                                                                     |                                                                             |                                                                 |                                                      |                                                             |                         |                  |
| 3                                                                                                     |                                                                                                               |                              |                                      |                                   |                                     |                                        |                                                                    |                                                                                                                                                                                                     |                                                                             |                                                                 |                                                      |                                                             |                         |                  |
| 4                                                                                                     |                                                                                                               |                              |                                      |                                   |                                     |                                        |                                                                    |                                                                                                                                                                                                     |                                                                             |                                                                 |                                                      |                                                             |                         |                  |
| 5                                                                                                     |                                                                                                               |                              |                                      |                                   |                                     |                                        |                                                                    |                                                                                                                                                                                                     |                                                                             |                                                                 |                                                      |                                                             |                         |                  |
| 6                                                                                                     |                                                                                                               |                              |                                      |                                   |                                     |                                        |                                                                    |                                                                                                                                                                                                     |                                                                             |                                                                 |                                                      |                                                             |                         |                  |
| 7                                                                                                     |                                                                                                               |                              |                                      |                                   |                                     |                                        |                                                                    |                                                                                                                                                                                                     |                                                                             |                                                                 |                                                      |                                                             |                         |                  |
| 8                                                                                                     |                                                                                                               |                              |                                      |                                   |                                     |                                        |                                                                    |                                                                                                                                                                                                     |                                                                             |                                                                 |                                                      |                                                             |                         |                  |
| 9                                                                                                     |                                                                                                               |                              |                                      |                                   |                                     |                                        |                                                                    |                                                                                                                                                                                                     |                                                                             |                                                                 |                                                      |                                                             |                         |                  |
| 10                                                                                                    |                                                                                                               |                              |                                      |                                   |                                     |                                        |                                                                    |                                                                                                                                                                                                     |                                                                             |                                                                 |                                                      |                                                             |                         |                  |
| 11                                                                                                    |                                                                                                               |                              |                                      |                                   |                                     |                                        |                                                                    |                                                                                                                                                                                                     |                                                                             |                                                                 |                                                      |                                                             |                         |                  |
| 12                                                                                                    |                                                                                                               |                              |                                      |                                   |                                     |                                        |                                                                    |                                                                                                                                                                                                     |                                                                             |                                                                 |                                                      |                                                             |                         |                  |



|     |                            |               |   |   |   |               |   |   |   |   |                       |   |   |   |   |   |                       |   |   |   |   |   |                       |   |   |   |                                                                                        |  |  |  |  |  |  |  |  |  |  |  |  |  |  |  |  |  |  |  |  |  |  |  |  |  |  |  |
|-----|----------------------------|---------------|---|---|---|---------------|---|---|---|---|-----------------------|---|---|---|---|---|-----------------------|---|---|---|---|---|-----------------------|---|---|---|----------------------------------------------------------------------------------------|--|--|--|--|--|--|--|--|--|--|--|--|--|--|--|--|--|--|--|--|--|--|--|--|--|--|--|
| F01 | I<br>D<br>C<br>O<br>D<br>E | OPV2 (POLIO2) |   |   |   | OPV3 (POLIO3) |   |   |   |   | DPT1 or DPT/HepB/Hib1 |   |   |   |   |   | DPT2 or DPT/HepB/Hib2 |   |   |   |   |   | DPT3 or DPT/HepB/Hib3 |   |   |   | Has NAME had the following vaccinations? RECORD IN DATES FROM VACCINATION CARD. (»F26) |  |  |  |  |  |  |  |  |  |  |  |  |  |  |  |  |  |  |  |  |  |  |  |  |  |  |  |
|     |                            |               |   |   |   |               |   |   |   |   |                       |   |   |   |   |   |                       |   |   |   |   |   |                       |   |   |   |                                                                                        |  |  |  |  |  |  |  |  |  |  |  |  |  |  |  |  |  |  |  |  |  |  |  |  |  |  |  |
| M   | M                          | Y             | Y | D | D | M             | M | Y | Y | D | D                     | M | M | Y | Y | D | D                     | M | M | Y | Y | D | D                     | M | M | M | M                                                                                      |  |  |  |  |  |  |  |  |  |  |  |  |  |  |  |  |  |  |  |  |  |  |  |  |  |  |  |
| 1   |                            |               |   |   |   |               |   |   |   |   |                       |   |   |   |   |   |                       |   |   |   |   |   |                       |   |   |   |                                                                                        |  |  |  |  |  |  |  |  |  |  |  |  |  |  |  |  |  |  |  |  |  |  |  |  |  |  |  |
| 2   |                            |               |   |   |   |               |   |   |   |   |                       |   |   |   |   |   |                       |   |   |   |   |   |                       |   |   |   |                                                                                        |  |  |  |  |  |  |  |  |  |  |  |  |  |  |  |  |  |  |  |  |  |  |  |  |  |  |  |
| 3   |                            |               |   |   |   |               |   |   |   |   |                       |   |   |   |   |   |                       |   |   |   |   |   |                       |   |   |   |                                                                                        |  |  |  |  |  |  |  |  |  |  |  |  |  |  |  |  |  |  |  |  |  |  |  |  |  |  |  |
| 4   |                            |               |   |   |   |               |   |   |   |   |                       |   |   |   |   |   |                       |   |   |   |   |   |                       |   |   |   |                                                                                        |  |  |  |  |  |  |  |  |  |  |  |  |  |  |  |  |  |  |  |  |  |  |  |  |  |  |  |
| 5   |                            |               |   |   |   |               |   |   |   |   |                       |   |   |   |   |   |                       |   |   |   |   |   |                       |   |   |   |                                                                                        |  |  |  |  |  |  |  |  |  |  |  |  |  |  |  |  |  |  |  |  |  |  |  |  |  |  |  |
| 6   |                            |               |   |   |   |               |   |   |   |   |                       |   |   |   |   |   |                       |   |   |   |   |   |                       |   |   |   |                                                                                        |  |  |  |  |  |  |  |  |  |  |  |  |  |  |  |  |  |  |  |  |  |  |  |  |  |  |  |
| 7   |                            |               |   |   |   |               |   |   |   |   |                       |   |   |   |   |   |                       |   |   |   |   |   |                       |   |   |   |                                                                                        |  |  |  |  |  |  |  |  |  |  |  |  |  |  |  |  |  |  |  |  |  |  |  |  |  |  |  |
| 8   |                            |               |   |   |   |               |   |   |   |   |                       |   |   |   |   |   |                       |   |   |   |   |   |                       |   |   |   |                                                                                        |  |  |  |  |  |  |  |  |  |  |  |  |  |  |  |  |  |  |  |  |  |  |  |  |  |  |  |
| 9   |                            |               |   |   |   |               |   |   |   |   |                       |   |   |   |   |   |                       |   |   |   |   |   |                       |   |   |   |                                                                                        |  |  |  |  |  |  |  |  |  |  |  |  |  |  |  |  |  |  |  |  |  |  |  |  |  |  |  |
| 10  |                            |               |   |   |   |               |   |   |   |   |                       |   |   |   |   |   |                       |   |   |   |   |   |                       |   |   |   |                                                                                        |  |  |  |  |  |  |  |  |  |  |  |  |  |  |  |  |  |  |  |  |  |  |  |  |  |  |  |
| 11  |                            |               |   |   |   |               |   |   |   |   |                       |   |   |   |   |   |                       |   |   |   |   |   |                       |   |   |   |                                                                                        |  |  |  |  |  |  |  |  |  |  |  |  |  |  |  |  |  |  |  |  |  |  |  |  |  |  |  |
| 12  |                            |               |   |   |   |               |   |   |   |   |                       |   |   |   |   |   |                       |   |   |   |   |   |                       |   |   |   |                                                                                        |  |  |  |  |  |  |  |  |  |  |  |  |  |  |  |  |  |  |  |  |  |  |  |  |  |  |  |

|                            |   |   |   |   |   |   |   |        |                                                                                                                                                               |                                                                                                                 |                                                                                               |                                                       |                                                                      |                                                                                                                       |                                          |                                                                                                                    |                                                   |
|----------------------------|---|---|---|---|---|---|---|--------|---------------------------------------------------------------------------------------------------------------------------------------------------------------|-----------------------------------------------------------------------------------------------------------------|-----------------------------------------------------------------------------------------------|-------------------------------------------------------|----------------------------------------------------------------------|-----------------------------------------------------------------------------------------------------------------------|------------------------------------------|--------------------------------------------------------------------------------------------------------------------|---------------------------------------------------|
| F01                        |   |   |   |   |   |   |   |        | F18                                                                                                                                                           | F19                                                                                                             | F20                                                                                           | F21                                                   | F22                                                                  | F23                                                                                                                   | F24                                      | F25                                                                                                                | F26                                               |
| I<br>D<br>C<br>O<br>D<br>E |   |   |   |   |   |   |   |        | Has NAME ever received any vaccinations to prevent him/her from getting childhood diseases (including vaccinations received in a national immunization days)? | Has NAME ever been given a BCG vaccine against tuberculosis (injection given on the left hand and leaves a scar | Has NAME ever been given any vaccination drops in the mouth to protect one from getting POLIO | How old was NAME when the first POLIO dose was given? | How many more times was NAME given POLIO drops since the first dose? | Has NAME ever been given any vaccination on the thigh to prevent from getting Tetanus, Whooping cough and Diphtheria? | How many times was NAME given DPT doses? | Has NAME ever been given any vaccination in the upper arm at the age of 9 months or later to prevent from measles? | Check whether NAME has a BCG scar on the left arm |
|                            |   |   |   |   |   |   |   | YES 1  |                                                                                                                                                               | YES 1                                                                                                           | LESS THAN                                                                                     | YES 1                                                 |                                                                      |                                                                                                                       |                                          |                                                                                                                    |                                                   |
|                            |   |   |   |   |   |   |   | NO 2   |                                                                                                                                                               | NO 2                                                                                                            | SIX WEEKS 1                                                                                   | NO 2                                                  |                                                                      |                                                                                                                       |                                          |                                                                                                                    |                                                   |
|                            |   |   |   |   |   |   |   | (»F26) | YES 1                                                                                                                                                         | (»F23)                                                                                                          | SIX WEEKS                                                                                     | (»F25)                                                |                                                                      |                                                                                                                       |                                          | YES 1                                                                                                              |                                                   |
|                            |   |   |   |   |   |   |   | DK 3   | NO 2                                                                                                                                                          | DK 2                                                                                                            | OR MORE 2                                                                                     | DK 2                                                  |                                                                      |                                                                                                                       |                                          | NO 2                                                                                                               | YES 1                                             |
|                            | Y | Y | D | D | M | M | Y | (»F26) | DK 8                                                                                                                                                          | (»F23)                                                                                                          | DK 8                                                                                          | NUMBER                                                | (»F25)                                                               | NUMBER                                                                                                                | DK 8                                     | NO 2                                                                                                               |                                                   |
| 1                          |   |   |   |   |   |   |   |        |                                                                                                                                                               |                                                                                                                 |                                                                                               |                                                       |                                                                      |                                                                                                                       |                                          |                                                                                                                    |                                                   |
| 2                          |   |   |   |   |   |   |   |        |                                                                                                                                                               |                                                                                                                 |                                                                                               |                                                       |                                                                      |                                                                                                                       |                                          |                                                                                                                    |                                                   |
| 3                          |   |   |   |   |   |   |   |        |                                                                                                                                                               |                                                                                                                 |                                                                                               |                                                       |                                                                      |                                                                                                                       |                                          |                                                                                                                    |                                                   |
| 4                          |   |   |   |   |   |   |   |        |                                                                                                                                                               |                                                                                                                 |                                                                                               |                                                       |                                                                      |                                                                                                                       |                                          |                                                                                                                    |                                                   |
| 5                          |   |   |   |   |   |   |   |        |                                                                                                                                                               |                                                                                                                 |                                                                                               |                                                       |                                                                      |                                                                                                                       |                                          |                                                                                                                    |                                                   |
| 6                          |   |   |   |   |   |   |   |        |                                                                                                                                                               |                                                                                                                 |                                                                                               |                                                       |                                                                      |                                                                                                                       |                                          |                                                                                                                    |                                                   |
| 7                          |   |   |   |   |   |   |   |        |                                                                                                                                                               |                                                                                                                 |                                                                                               |                                                       |                                                                      |                                                                                                                       |                                          |                                                                                                                    |                                                   |
| 8                          |   |   |   |   |   |   |   |        |                                                                                                                                                               |                                                                                                                 |                                                                                               |                                                       |                                                                      |                                                                                                                       |                                          |                                                                                                                    |                                                   |
| 9                          |   |   |   |   |   |   |   |        |                                                                                                                                                               |                                                                                                                 |                                                                                               |                                                       |                                                                      |                                                                                                                       |                                          |                                                                                                                    |                                                   |
| 10                         |   |   |   |   |   |   |   |        |                                                                                                                                                               |                                                                                                                 |                                                                                               |                                                       |                                                                      |                                                                                                                       |                                          |                                                                                                                    |                                                   |
| 11                         |   |   |   |   |   |   |   |        |                                                                                                                                                               |                                                                                                                 |                                                                                               |                                                       |                                                                      |                                                                                                                       |                                          |                                                                                                                    |                                                   |
| 12                         |   |   |   |   |   |   |   |        |                                                                                                                                                               |                                                                                                                 |                                                                                               |                                                       |                                                                      |                                                                                                                       |                                          |                                                                                                                    |                                                   |

|                                                                                                                    |                                                                                     |                                                                                  |                                                                            |                                                                                 |                                            |
|--------------------------------------------------------------------------------------------------------------------|-------------------------------------------------------------------------------------|----------------------------------------------------------------------------------|----------------------------------------------------------------------------|---------------------------------------------------------------------------------|--------------------------------------------|
| F01                                                                                                                | F27                                                                                 | F28                                                                              | F29                                                                        | F30                                                                             | F31                                        |
| INDICATED CODE 1<br>OTHERWISE<br>CODE 2<br><br>DO NOT<br>ADMINISTER<br>THIS<br>MODULE TO<br>INDIVIDUALS<br>CODED 1 | PUT CODE 1<br>FOR ALL<br>INDIVIDUALS<br>WHO ARE<br>LESS THAN 6<br>MONTHS IN<br>AGE. | WEIGHT<br>IF LESS THAN 10<br>KG, PUT ZERO (0)<br>IN FIRST CELL OF<br>THIS COLUMN | HEIGHT /<br>LENGTH<br>MEASURED<br>WITH CHILD<br>STANDING OR<br>LYING DOWN? | HEIGHT<br>IF LESS THAN 100 CMS,<br>PUT ZERO (0) IN FIRST<br>CELL OF THIS COLUMN | IF NAME NOT<br>MEASURED,<br>REASON<br>WHY? |
|                                                                                                                    | OTHERWISE<br>CODE 2                                                                 |                                                                                  |                                                                            |                                                                                 | NOT HOME                                   |
|                                                                                                                    |                                                                                     |                                                                                  |                                                                            |                                                                                 | DURING SURVEY                              |
|                                                                                                                    |                                                                                     |                                                                                  |                                                                            |                                                                                 | PERIOD 1                                   |
|                                                                                                                    |                                                                                     |                                                                                  |                                                                            |                                                                                 | TOO ILL 2                                  |
|                                                                                                                    |                                                                                     |                                                                                  | STANDING 1                                                                 |                                                                                 | UNWILLING 3                                |
|                                                                                                                    |                                                                                     | KGS                                                                              | LYING DOWN 2                                                               | CMS                                                                             | OTHER 4                                    |
| 1                                                                                                                  |                                                                                     |                                                                                  |                                                                            |                                                                                 |                                            |
| 2                                                                                                                  |                                                                                     |                                                                                  |                                                                            |                                                                                 |                                            |
| 3                                                                                                                  |                                                                                     |                                                                                  |                                                                            |                                                                                 |                                            |
| 4                                                                                                                  |                                                                                     |                                                                                  |                                                                            |                                                                                 |                                            |
| 5                                                                                                                  |                                                                                     |                                                                                  |                                                                            |                                                                                 |                                            |
| 6                                                                                                                  |                                                                                     |                                                                                  |                                                                            |                                                                                 |                                            |
| 7                                                                                                                  |                                                                                     |                                                                                  |                                                                            |                                                                                 |                                            |
| 8                                                                                                                  |                                                                                     |                                                                                  |                                                                            |                                                                                 |                                            |
| 9                                                                                                                  |                                                                                     |                                                                                  |                                                                            |                                                                                 |                                            |
| 10                                                                                                                 |                                                                                     |                                                                                  |                                                                            |                                                                                 |                                            |
| 11                                                                                                                 |                                                                                     |                                                                                  |                                                                            |                                                                                 |                                            |
| 12                                                                                                                 |                                                                                     |                                                                                  |                                                                            |                                                                                 |                                            |

## **SECTION G: HOUSING**

**[ASK OF HOUSEHOLD HEAD OR KNOWLEDGEABLE HOUSEHOLD MEMBER]**

**[ASK OF HOUSEHOLD HEAD OR KNOWLEDGEABLE HOUSEHOLD MEMBER]**

[illegible]

|  |  |  |  |  |  |  |    |  |  |  |  |  |  |
|--|--|--|--|--|--|--|----|--|--|--|--|--|--|
|  |  |  |  |  |  |  |    |  |  |  |  |  |  |
|  |  |  |  |  |  |  | 24 |  |  |  |  |  |  |

| ENERGY                                               |                                            |                                    |                                                                    |                                                         |                                                                                                                                          |                                                                                                                                                                                                                                                 |                                                                        |                                                               |                                                                                                  |                                                                            |                                                                             |                                                                              |
|------------------------------------------------------|--------------------------------------------|------------------------------------|--------------------------------------------------------------------|---------------------------------------------------------|------------------------------------------------------------------------------------------------------------------------------------------|-------------------------------------------------------------------------------------------------------------------------------------------------------------------------------------------------------------------------------------------------|------------------------------------------------------------------------|---------------------------------------------------------------|--------------------------------------------------------------------------------------------------|----------------------------------------------------------------------------|-----------------------------------------------------------------------------|------------------------------------------------------------------------------|
| H19                                                  | H20                                        | H21                                | H22                                                                | H23                                                     | H24                                                                                                                                      | H25                                                                                                                                                                                                                                             | H26                                                                    | H27                                                           | H28                                                                                              | H29                                                                        | H30                                                                         | H31                                                                          |
| Does HH have installed solar panels in the dwelling? | What is the size of solar panels in watts? | Does HH get electricity from KPLC? | Does HH get any electricity from generator?                        | Does HH get electricity from car or motorcycle battery? | What is HH main source of electricity?                                                                                                   | What was the total cost for electricity in the household over the last month?<br><br>IF THE HOUSEHOLD RECEIVED AN ACTUAL BILL, REFER TO THE LAST BILL RECEIVED. INCLUDE OTHER PAYMENTS/COST OF ELECTRICITY WHICH DO NOT COME ON A WRITTEN BILL. | What is the total cost of lighting last month (excluding electricity)? | Does HH usually have any electricity working in the dwelling? | Although you do not have electricity here, are there HH connected within 100m from the dwelling? | Did household use small torch batteries (dry cells) in the last one month? | How many small torch batteries(dry cells) did household use in the past one | What is the value of these batteries (dry cells) used in the past one month? |
| YES 1<br>NO 2<br>->>H21                              | DK 998<br><br><br><br>WATTS                | YES 1<br>NO 2                      | OWN GENERATOR 1<br>NEIGHBOR GENERATOR 2<br>NO 3<br>OTHER (specif 4 | CAR 1<br>MOTOR CYCLE 2<br>BOTH 3<br>NO 4                | KPLC 1<br>COMMUNITY GENERATOR 2<br>SOLAR PANELS 3<br>GENERATOR, OWN 4<br>CAR BATTERY 5<br>MOTORCYCLE 6<br>BATTERY 7<br>OTHER (SPECIFY) 7 |                                                                                                                                                                                                                                                 | KSHS                                                                   | YES 1<br>(->H29)<br>NO 2                                      | YES 1<br>NO 2                                                                                    | YES 1<br>(->H32)<br>NO 2                                                   | NUMBER                                                                      | KSHS                                                                         |
|                                                      |                                            |                                    |                                                                    |                                                         |                                                                                                                                          |                                                                                                                                                                                                                                                 |                                                                        |                                                               |                                                                                                  |                                                                            |                                                                             |                                                                              |
|                                                      |                                            |                                    |                                                                    |                                                         |                                                                                                                                          |                                                                                                                                                                                                                                                 |                                                                        |                                                               |                                                                                                  |                                                                            |                                                                             |                                                                              |

**[ASK OF HOUSEHOLD HEAD OR KNOWLEDGEABLE HOUSEHOLD MEMBER]**

## ENERGY

SECTION I: CONSUMPTION OF FOOD OVER PAST ONE WEEK

PROMPT FOR EACH ITEM ON THE LIST.

| Over the past one week (7 days), did household acquire / purchased / consumed any [ . . ]? | I01           | I02       | I03<br>How much was purchased? |                     |      | I04<br>How much of the purchased was consumed? | I05<br>How much was consumed from own-production? |                     | I05A<br>How much was consumed from own stock? |                     | I06<br>How much was consumed from gifts and other sources? |                     | I07<br>How much in total did your household consume in the past week? |                     |  |                 |
|--------------------------------------------------------------------------------------------|---------------|-----------|--------------------------------|---------------------|------|------------------------------------------------|---------------------------------------------------|---------------------|-----------------------------------------------|---------------------|------------------------------------------------------------|---------------------|-----------------------------------------------------------------------|---------------------|--|-----------------|
|                                                                                            | YES 1<br>NO 2 |           |                                |                     |      |                                                |                                                   |                     |                                               |                     |                                                            |                     |                                                                       |                     |  |                 |
|                                                                                            | (»NEXT ITEM)  | ITEM CODE | QUANTITY                       | UNIT CODES AT RIGHT | KSHS | QUANTITY                                       | QUANTITY                                          | UNIT CODES AT RIGHT | QUANTITY                                      | UNIT CODES AT RIGHT | QUANTITY                                                   | UNIT CODES AT RIGHT | QUANTITY                                                              | UNIT CODES AT RIGHT |  |                 |
| CEREALS                                                                                    |               | 100       |                                |                     |      |                                                |                                                   |                     |                                               |                     |                                                            |                     |                                                                       |                     |  | KILOGRAMS 01    |
| Rice Grade 2                                                                               |               | 101       |                                |                     |      |                                                |                                                   |                     |                                               |                     |                                                            |                     |                                                                       |                     |  | GRAMS 02        |
| Rice- Grade 1 - Pishori/Basmati                                                            |               | 102       |                                |                     |      |                                                |                                                   |                     |                                               |                     |                                                            |                     |                                                                       |                     |  | LITRE 03        |
| Maize Grain - Loose                                                                        |               | 103       |                                |                     |      |                                                |                                                   |                     |                                               |                     |                                                            |                     |                                                                       |                     |  | MILLILITRE 04   |
| Green maize                                                                                |               | 104       |                                |                     |      |                                                |                                                   |                     |                                               |                     |                                                            |                     |                                                                       |                     |  | 5 KG. BAG 05    |
| Maize Flour - Loose                                                                        |               | 105       |                                |                     |      |                                                |                                                   |                     |                                               |                     |                                                            |                     |                                                                       |                     |  | 25 KG. BAG 06   |
| Maize Flour - sifted                                                                       |               | 106       |                                |                     |      |                                                |                                                   |                     |                                               |                     |                                                            |                     |                                                                       |                     |  | 50 KG. BAG 07   |
| Wheat grain                                                                                |               | 107       |                                |                     |      |                                                |                                                   |                     |                                               |                     |                                                            |                     |                                                                       |                     |  | 90 KG. BAG 08   |
| Wheat Flour                                                                                |               | 108       |                                |                     |      |                                                |                                                   |                     |                                               |                     |                                                            |                     |                                                                       |                     |  | DEBE 09         |
| Millet grain - wimbi                                                                       |               | 109       |                                |                     |      |                                                |                                                   |                     |                                               |                     |                                                            |                     |                                                                       |                     |  | TABLE SPOON 10  |
| Millet Flour - Wimbi                                                                       |               | 110       |                                |                     |      |                                                |                                                   |                     |                                               |                     |                                                            |                     |                                                                       |                     |  | BUNCH 11        |
| Sorghum grain                                                                              |               | 111       |                                |                     |      |                                                |                                                   |                     |                                               |                     |                                                            |                     |                                                                       |                     |  | PIECE/NUMBER 12 |
| Sorghum flour                                                                              |               | 112       |                                |                     |      |                                                |                                                   |                     |                                               |                     |                                                            |                     |                                                                       |                     |  | HEAP 13         |
| Other millet grain/flour                                                                   |               | 113       |                                |                     |      |                                                |                                                   |                     |                                               |                     |                                                            |                     |                                                                       |                     |  | HANDFUL 14      |
| Barley and other cereals                                                                   |               | 114       |                                |                     |      |                                                |                                                   |                     |                                               |                     |                                                            |                     |                                                                       |                     |  | PAKAACHA 15     |
| COST OF MILLING                                                                            |               | 115       |                                |                     |      |                                                |                                                   |                     |                                               |                     |                                                            |                     |                                                                       |                     |  | GOROGORO 16     |
| Bread                                                                                      |               | 116       |                                |                     |      |                                                |                                                   |                     |                                               |                     |                                                            |                     |                                                                       |                     |  | 1/4 KG TIN 17   |
| Cakes                                                                                      |               | 117       |                                |                     |      |                                                |                                                   |                     |                                               |                     |                                                            |                     |                                                                       |                     |  | 1/2 KG TIN 18   |
| Biscuits ...                                                                               |               | 118       |                                |                     |      |                                                |                                                   |                     |                                               |                     |                                                            |                     |                                                                       |                     |  | 1 KG TIN 19     |
| Breakfast cereal/oats                                                                      |               | 119       |                                |                     |      |                                                |                                                   |                     |                                               |                     |                                                            |                     |                                                                       |                     |  | BOWL 20         |
| Wheat buns /Scones                                                                         |               | 120       |                                |                     |      |                                                |                                                   |                     |                                               |                     |                                                            |                     |                                                                       |                     |  | CUP 21          |
| Pasta (spaghetti/macaroni)                                                                 |               | 121       |                                |                     |      |                                                |                                                   |                     |                                               |                     |                                                            |                     |                                                                       |                     |  | GLASS 22        |

SECTION I: CONSUMPTION OF FOOD OVER PAST ONE WEEK

PROMPT FOR EACH ITEM ON THE LIST.

| Over the past one week (7 days), did household acquire / purchased / consumed any [ . . ]? | I01                               | I02       | I03                     |                     |      | I04                                     | I05                                        |                     | I05A                                  |                     | I06                                                 |                     | I07                                                            |                     |                    |
|--------------------------------------------------------------------------------------------|-----------------------------------|-----------|-------------------------|---------------------|------|-----------------------------------------|--------------------------------------------|---------------------|---------------------------------------|---------------------|-----------------------------------------------------|---------------------|----------------------------------------------------------------|---------------------|--------------------|
|                                                                                            |                                   |           | How much was purchased? |                     |      | How much of the purchased was consumed? | How much was consumed from own-production? |                     | How much was consumed from own stock? |                     | How much was consumed from gifts and other sources? |                     | How much in total did your household consume in the past week? |                     |                    |
|                                                                                            | YES 1<br>NO 2<br><br>(»NEXT ITEM) | ITEM CODE | QUANTITY                | UNIT CODES AT RIGHT | KSHS | QUANTITY                                | QUANTITY                                   | UNIT CODES AT RIGHT | QUANTITY                              | UNIT CODES AT RIGHT | QUANTITY                                            | UNIT CODES AT RIGHT | QUANTITY                                                       | UNIT CODES AT RIGHT |                    |
| Roots and tubers                                                                           |                                   | 200       |                         |                     |      |                                         |                                            |                     |                                       |                     |                                                     |                     |                                                                |                     | KILOGRAMS 01       |
| Potatoes (Irish)                                                                           |                                   | 201       |                         |                     |      |                                         |                                            |                     |                                       |                     |                                                     |                     |                                                                |                     | GRAMS 02           |
| Sweet potato                                                                               |                                   | 202       |                         |                     |      |                                         |                                            |                     |                                       |                     |                                                     |                     |                                                                |                     | LITRE 03           |
| Arrow roots                                                                                |                                   | 203       |                         |                     |      |                                         |                                            |                     |                                       |                     |                                                     |                     |                                                                |                     | MILLILITRE 04      |
| Cassava                                                                                    |                                   | 204       |                         |                     |      |                                         |                                            |                     |                                       |                     |                                                     |                     |                                                                |                     | 5 KG. BAG 05       |
| Cassava flour                                                                              |                                   | 205       |                         |                     |      |                                         |                                            |                     |                                       |                     |                                                     |                     |                                                                |                     | 25 KG. BAG 06      |
| Yams                                                                                       |                                   | 206       |                         |                     |      |                                         |                                            |                     |                                       |                     |                                                     |                     |                                                                |                     | 50 KG. BAG 07      |
| Crisps                                                                                     |                                   | 207       |                         |                     |      |                                         |                                            |                     |                                       |                     |                                                     |                     |                                                                |                     | 90 KG. BAG 08      |
| Cooking banana                                                                             |                                   | 208       |                         |                     |      |                                         |                                            |                     |                                       |                     |                                                     |                     |                                                                |                     | DEBE 09            |
| Pulses                                                                                     |                                   | 300       |                         |                     |      |                                         |                                            |                     |                                       |                     |                                                     |                     |                                                                |                     | TABLE SPOON 10     |
| Beans                                                                                      |                                   | 301       |                         |                     |      |                                         |                                            |                     |                                       |                     |                                                     |                     |                                                                |                     | BUNCH 11           |
| Grams                                                                                      |                                   | 302       |                         |                     |      |                                         |                                            |                     |                                       |                     |                                                     |                     |                                                                |                     | PIECE/NUMBER 12    |
| Black grams (Njahi)                                                                        |                                   | 303       |                         |                     |      |                                         |                                            |                     |                                       |                     |                                                     |                     |                                                                |                     | HEAP 13            |
| Peas                                                                                       |                                   | 304       |                         |                     |      |                                         |                                            |                     |                                       |                     |                                                     |                     |                                                                |                     | HANDFUL 14         |
| Groundnut                                                                                  |                                   | 305       |                         |                     |      |                                         |                                            |                     |                                       |                     |                                                     |                     |                                                                |                     | PAKAACHA 15        |
| Cowpea                                                                                     |                                   | 306       |                         |                     |      |                                         |                                            |                     |                                       |                     |                                                     |                     |                                                                |                     | GOROGORO 16        |
| Other pulses (specify)                                                                     |                                   | 307       |                         |                     |      |                                         |                                            |                     |                                       |                     |                                                     |                     |                                                                |                     | 1/4 KG TIN 17      |
| Vegetables                                                                                 |                                   | 400       |                         |                     |      |                                         |                                            |                     |                                       |                     |                                                     |                     |                                                                |                     | 1/2 KG TIN 18      |
| onion / Leeks                                                                              |                                   | 401       |                         |                     |      |                                         |                                            |                     |                                       |                     |                                                     |                     |                                                                |                     | 1 KG TIN 19        |
| Cabbages                                                                                   |                                   | 402       |                         |                     |      |                                         |                                            |                     |                                       |                     |                                                     |                     |                                                                |                     | BOWL 20            |
| Carrots                                                                                    |                                   | 403       |                         |                     |      |                                         |                                            |                     |                                       |                     |                                                     |                     |                                                                |                     | CUP 21             |
| Tomatoes                                                                                   |                                   | 404       |                         |                     |      |                                         |                                            |                     |                                       |                     |                                                     |                     |                                                                |                     | GLASS 22           |
| Spinach                                                                                    |                                   | 405       |                         |                     |      |                                         |                                            |                     |                                       |                     |                                                     |                     |                                                                |                     | OTHER (SPECIFY) 23 |

SECTION I: CONSUMPTION OF FOOD OVER PAST ONE WEEK

PROMPT FOR EACH ITEM ON THE LIST.

| Over the past one week (7 days), did household acquire / purchased / consumed any [. . .]? | I01           | I02       | I03<br>How much was purchased? |                     |      | I04<br>How much of the purchased was consumed? | I05<br>How much was consumed from own-production? |                     | I05A<br>How much was consumed from own stock? |                     | I06<br>How much was consumed from gifts and other sources? |                     | I07<br>How much in total did your household consume in the past week? |                     |                 |    |
|--------------------------------------------------------------------------------------------|---------------|-----------|--------------------------------|---------------------|------|------------------------------------------------|---------------------------------------------------|---------------------|-----------------------------------------------|---------------------|------------------------------------------------------------|---------------------|-----------------------------------------------------------------------|---------------------|-----------------|----|
|                                                                                            | YES 1<br>NO 2 |           |                                |                     |      |                                                |                                                   |                     |                                               |                     |                                                            |                     |                                                                       |                     |                 |    |
|                                                                                            | (»NEXT ITEM)  | ITEM CODE | QUANTITY                       | UNIT CODES AT RIGHT | KSHS | QUANTITY                                       | QUANTITY                                          | UNIT CODES AT RIGHT | QUANTITY                                      | UNIT CODES AT RIGHT | QUANTITY                                                   | UNIT CODES AT RIGHT | QUANTITY                                                              | UNIT CODES AT RIGHT |                 |    |
| Kale-Sukuma wiki                                                                           |               | 406       |                                |                     |      |                                                |                                                   |                     |                                               |                     |                                                            |                     |                                                                       |                     | KILOGRAMS       | 01 |
| Capsicums (Pilipili hoho)                                                                  |               | 407       |                                |                     |      |                                                |                                                   |                     |                                               |                     |                                                            |                     |                                                                       |                     | GRAMS           | 02 |
| Cucumber                                                                                   |               | 408       |                                |                     |      |                                                |                                                   |                     |                                               |                     |                                                            |                     |                                                                       |                     | LITRE           | 03 |
| French beans                                                                               |               | 409       |                                |                     |      |                                                |                                                   |                     |                                               |                     |                                                            |                     |                                                                       |                     | MILLILITRE      | 04 |
| Lettuce                                                                                    |               | 410       |                                |                     |      |                                                |                                                   |                     |                                               |                     |                                                            |                     |                                                                       |                     | 5 KG. BAG       | 05 |
| Courgette                                                                                  |               | 411       |                                |                     |      |                                                |                                                   |                     |                                               |                     |                                                            |                     |                                                                       |                     | 25 KG. BAG      | 06 |
| Celery                                                                                     |               | 412       |                                |                     |      |                                                |                                                   |                     |                                               |                     |                                                            |                     |                                                                       |                     | 50 KG. BAG      | 07 |
| mushrooms                                                                                  |               | 413       |                                |                     |      |                                                |                                                   |                     |                                               |                     |                                                            |                     |                                                                       |                     | 90 KG. BAG      | 08 |
| Cauliflower                                                                                |               | 414       |                                |                     |      |                                                |                                                   |                     |                                               |                     |                                                            |                     |                                                                       |                     | DEBE            | 09 |
| Aubergines-Egg plant (Biringanya)                                                          |               | 415       |                                |                     |      |                                                |                                                   |                     |                                               |                     |                                                            |                     |                                                                       |                     | TABLE SPOON     | 10 |
| Pumpkins                                                                                   |               | 416       |                                |                     |      |                                                |                                                   |                     |                                               |                     |                                                            |                     |                                                                       |                     | BUNCH           | 11 |
| Okra                                                                                       |               | 417       |                                |                     |      |                                                |                                                   |                     |                                               |                     |                                                            |                     |                                                                       |                     | PIECE/NUMBER    | 12 |
| Coriander leaves (Dania)                                                                   |               | 418       |                                |                     |      |                                                |                                                   |                     |                                               |                     |                                                            |                     |                                                                       |                     | HEAP            | 13 |
| Other vegetables (specify: _____)                                                          |               | 419       |                                |                     |      |                                                |                                                   |                     |                                               |                     |                                                            |                     |                                                                       |                     | HANDFUL         | 14 |
| Meat                                                                                       |               | 500       |                                |                     |      |                                                |                                                   |                     |                                               |                     |                                                            |                     |                                                                       |                     | PAKAACHA        | 15 |
| Beef - with bones                                                                          |               | 501       |                                |                     |      |                                                |                                                   |                     |                                               |                     |                                                            |                     |                                                                       |                     | GOROGORO        | 16 |
| Beef - without bones                                                                       |               | 502       |                                |                     |      |                                                |                                                   |                     |                                               |                     |                                                            |                     |                                                                       |                     | 1/4 KG TIN      | 17 |
| Minced meat                                                                                |               | 503       |                                |                     |      |                                                |                                                   |                     |                                               |                     |                                                            |                     |                                                                       |                     | 1/2 KG TIN      | 18 |
| Pork                                                                                       |               | 504       |                                |                     |      |                                                |                                                   |                     |                                               |                     |                                                            |                     |                                                                       |                     | 1 KG TIN        | 19 |
| Mutton/Goat meat                                                                           |               | 505       |                                |                     |      |                                                |                                                   |                     |                                               |                     |                                                            |                     |                                                                       |                     | BOWL            | 20 |
| Chicken                                                                                    |               | 506       |                                |                     |      |                                                |                                                   |                     |                                               |                     |                                                            |                     |                                                                       |                     | CUP             | 21 |
| Camel meat                                                                                 |               | 507       |                                |                     |      |                                                |                                                   |                     |                                               |                     |                                                            |                     |                                                                       |                     | GLASS           | 22 |
| Other Meats (specify)                                                                      |               | 508       |                                |                     |      |                                                |                                                   |                     |                                               |                     |                                                            |                     |                                                                       |                     | OTHER (SPECIFY) | 23 |

**SECTION I: CONSUMPTION OF FOOD OVER PAST ONE WEEK**

PROMPT FOR EACH ITEM ON THE LIST.

| Over the past one week (7 days), did household acquire / purchased / consumed any [ . . ]? | I01                               | I02       | I03                     |                     |      | I04                                     | I05                                        |                     | I05A                                  |                     | I06                                                 |                     | I07                                                            |                     |                    |
|--------------------------------------------------------------------------------------------|-----------------------------------|-----------|-------------------------|---------------------|------|-----------------------------------------|--------------------------------------------|---------------------|---------------------------------------|---------------------|-----------------------------------------------------|---------------------|----------------------------------------------------------------|---------------------|--------------------|
|                                                                                            |                                   |           | How much was purchased? |                     |      | How much of the purchased was consumed? | How much was consumed from own-production? |                     | How much was consumed from own stock? |                     | How much was consumed from gifts and other sources? |                     | How much in total did your household consume in the past week? |                     |                    |
|                                                                                            | YES 1<br>NO 2<br><br>(»NEXT ITEM) | ITEM CODE | QUANTITY                | UNIT CODES AT RIGHT | KSHS | QUANTITY                                | QUANTITY                                   | UNIT CODES AT RIGHT | QUANTITY                              | UNIT CODES AT RIGHT | QUANTITY                                            | UNIT CODES AT RIGHT | QUANTITY                                                       | UNIT CODES AT RIGHT |                    |
| <b>Other Animal products</b>                                                               |                                   | 600       |                         |                     |      |                                         |                                            |                     |                                       |                     |                                                     |                     |                                                                |                     | KILOGRAMS 01       |
| Offal's (liver, kidney, etc)-Matumbo                                                       |                                   | 601       |                         |                     |      |                                         |                                            |                     |                                       |                     |                                                     |                     |                                                                |                     | GRAMS 02           |
| Sausages                                                                                   |                                   | 602       |                         |                     |      |                                         |                                            |                     |                                       |                     |                                                     |                     |                                                                |                     | LITRE 03           |
| Bacon                                                                                      |                                   | 603       |                         |                     |      |                                         |                                            |                     |                                       |                     |                                                     |                     |                                                                |                     | MILLILITRE 04      |
| Ham/Salami                                                                                 |                                   | 604       |                         |                     |      |                                         |                                            |                     |                                       |                     |                                                     |                     |                                                                |                     | 5 KG. BAG 05       |
| Corned beef                                                                                |                                   | 605       |                         |                     |      |                                         |                                            |                     |                                       |                     |                                                     |                     |                                                                |                     | 25 KG. BAG 06      |
| <b>Fish</b>                                                                                |                                   | 700       |                         |                     |      |                                         |                                            |                     |                                       |                     |                                                     |                     |                                                                |                     | 50 KG. BAG 07      |
| Fresh fish                                                                                 |                                   | 701       |                         |                     |      |                                         |                                            |                     |                                       |                     |                                                     |                     |                                                                |                     | 90 KG. BAG 08      |
| Frozen Fish Filets                                                                         |                                   | 702       |                         |                     |      |                                         |                                            |                     |                                       |                     |                                                     |                     |                                                                |                     | DEBE 09            |
| Dried/smoked fish                                                                          |                                   | 703       |                         |                     |      |                                         |                                            |                     |                                       |                     |                                                     |                     |                                                                |                     | TABLE SPOON 10     |
| Prawns /Other sea Foods                                                                    |                                   | 704       |                         |                     |      |                                         |                                            |                     |                                       |                     |                                                     |                     |                                                                |                     | BUNCH 11           |
| <b>Dairy products and eggs</b>                                                             |                                   | 800       |                         |                     |      |                                         |                                            |                     |                                       |                     |                                                     |                     |                                                                |                     | PIECE/NUMBER 12    |
| Milk - fresh unpacketed                                                                    |                                   | 801       |                         |                     |      |                                         |                                            |                     |                                       |                     |                                                     |                     |                                                                |                     | HEAP 13            |
| milk - fresh packeted                                                                      |                                   | 802       |                         |                     |      |                                         |                                            |                     |                                       |                     |                                                     |                     |                                                                |                     | HANDFUL 14         |
| milk - fresh flavoured packeted                                                            |                                   | 803       |                         |                     |      |                                         |                                            |                     |                                       |                     |                                                     |                     |                                                                |                     | PAKAACHA 15        |
| UHT- fresh flavoured Milk                                                                  |                                   | 804       |                         |                     |      |                                         |                                            |                     |                                       |                     |                                                     |                     |                                                                |                     | GOROGORO 16        |
| Milk - condensed/powder                                                                    |                                   | 805       |                         |                     |      |                                         |                                            |                     |                                       |                     |                                                     |                     |                                                                |                     | 1/4 KG TIN 17      |
| Baby milk - tinned                                                                         |                                   | 806       |                         |                     |      |                                         |                                            |                     |                                       |                     |                                                     |                     |                                                                |                     | 1/2 KG TIN 18      |
| Milk Sour - Mala                                                                           |                                   | 807       |                         |                     |      |                                         |                                            |                     |                                       |                     |                                                     |                     |                                                                |                     | 1 KG TIN 19        |
| Yogurt (clotted milk)                                                                      |                                   | 808       |                         |                     |      |                                         |                                            |                     |                                       |                     |                                                     |                     |                                                                |                     | BOWL 20            |
| Fresh cream                                                                                |                                   | 809       |                         |                     |      |                                         |                                            |                     |                                       |                     |                                                     |                     |                                                                |                     | CUP 21             |
| Cheese                                                                                     |                                   | 810       |                         |                     |      |                                         |                                            |                     |                                       |                     |                                                     |                     |                                                                |                     | GLASS 22           |
| Eggs                                                                                       |                                   | 811       |                         |                     |      |                                         |                                            |                     |                                       |                     |                                                     |                     |                                                                |                     | OTHER (SPECIFY) 23 |

SECTION I: CONSUMPTION OF FOOD OVER PAST ONE WEEK

PROMPT FOR EACH ITEM ON THE LIST.

| Over the past one week (7 days), did household acquire / purchased / consumed any [ . . ]? | I01                               | I02       | I03                     |                     |      | I04                                     | I05                                        |                     | I05A                                  |                     | I06                                                 |                     | I07                                                            |                     |                    |
|--------------------------------------------------------------------------------------------|-----------------------------------|-----------|-------------------------|---------------------|------|-----------------------------------------|--------------------------------------------|---------------------|---------------------------------------|---------------------|-----------------------------------------------------|---------------------|----------------------------------------------------------------|---------------------|--------------------|
|                                                                                            |                                   |           | How much was purchased? |                     |      | How much of the purchased was consumed? | How much was consumed from own-production? |                     | How much was consumed from own stock? |                     | How much was consumed from gifts and other sources? |                     | How much in total did your household consume in the past week? |                     |                    |
|                                                                                            | YES 1<br>NO 2<br><br>(»NEXT ITEM) | ITEM CODE | QUANTITY                | UNIT CODES AT RIGHT | KSHS | QUANTITY                                | QUANTITY                                   | UNIT CODES AT RIGHT | QUANTITY                              | UNIT CODES AT RIGHT | QUANTITY                                            | UNIT CODES AT RIGHT | QUANTITY                                                       | UNIT CODES AT RIGHT |                    |
| Oils and Fats                                                                              |                                   | 900       |                         |                     |      |                                         |                                            |                     |                                       |                     |                                                     |                     |                                                                |                     | KILOGRAMS 01       |
| Butter                                                                                     |                                   | 901       |                         |                     |      |                                         |                                            |                     |                                       |                     |                                                     |                     |                                                                |                     | GRAMS 02           |
| Ghee from milk                                                                             |                                   | 902       |                         |                     |      |                                         |                                            |                     |                                       |                     |                                                     |                     |                                                                |                     | LITRE 03           |
| Margarine                                                                                  |                                   | 903       |                         |                     |      |                                         |                                            |                     |                                       |                     |                                                     |                     |                                                                |                     | MILLILITRE 04      |
| Cooking Fat                                                                                |                                   | 904       |                         |                     |      |                                         |                                            |                     |                                       |                     |                                                     |                     |                                                                |                     | 5 KG. BAG 05       |
| Cooking oil                                                                                |                                   | 905       |                         |                     |      |                                         |                                            |                     |                                       |                     |                                                     |                     |                                                                |                     | 25 KG. BAG 06      |
| Lard (from butcheries)                                                                     |                                   | 906       |                         |                     |      |                                         |                                            |                     |                                       |                     |                                                     |                     |                                                                |                     | 50 KG. BAG 07      |
| Peanut butter                                                                              |                                   | 907       |                         |                     |      |                                         |                                            |                     |                                       |                     |                                                     |                     |                                                                |                     | 90 KG. BAG 08      |
| Fruits                                                                                     |                                   | 1000      |                         |                     |      |                                         |                                            |                     |                                       |                     |                                                     |                     |                                                                |                     | DEBE 09            |
| Banana - ripe                                                                              |                                   | 1001      |                         |                     |      |                                         |                                            |                     |                                       |                     |                                                     |                     |                                                                |                     | TABLE SPOON 10     |
| Oranges                                                                                    |                                   | 1002      |                         |                     |      |                                         |                                            |                     |                                       |                     |                                                     |                     |                                                                |                     | BUNCH 11           |
| Pawpaws                                                                                    |                                   | 1003      |                         |                     |      |                                         |                                            |                     |                                       |                     |                                                     |                     |                                                                |                     | PIECE/NUMBER 12    |
| Avocado                                                                                    |                                   | 1004      |                         |                     |      |                                         |                                            |                     |                                       |                     |                                                     |                     |                                                                |                     | HEAP 13            |
| Mangoes                                                                                    |                                   | 1005      |                         |                     |      |                                         |                                            |                     |                                       |                     |                                                     |                     |                                                                |                     | HANDFUL 14         |
| Pineapples                                                                                 |                                   | 1006      |                         |                     |      |                                         |                                            |                     |                                       |                     |                                                     |                     |                                                                |                     | PAKAACHA 15        |
| Passion fruits                                                                             |                                   | 1007      |                         |                     |      |                                         |                                            |                     |                                       |                     |                                                     |                     |                                                                |                     | GOROGORO 16        |
| Pears                                                                                      |                                   | 1008      |                         |                     |      |                                         |                                            |                     |                                       |                     |                                                     |                     |                                                                |                     | 1/4 KG TIN 17      |
| Peaches                                                                                    |                                   | 1009      |                         |                     |      |                                         |                                            |                     |                                       |                     |                                                     |                     |                                                                |                     | 1/2 KG TIN 18      |
| Plums                                                                                      |                                   | 1010      |                         |                     |      |                                         |                                            |                     |                                       |                     |                                                     |                     |                                                                |                     | 1 KG TIN 19        |
| Apples                                                                                     |                                   | 1011      |                         |                     |      |                                         |                                            |                     |                                       |                     |                                                     |                     |                                                                |                     | BOWL 20            |
| Lemons                                                                                     |                                   | 1012      |                         |                     |      |                                         |                                            |                     |                                       |                     |                                                     |                     |                                                                |                     | CUP 21             |
| Grape fruit                                                                                |                                   | 1013      |                         |                     |      |                                         |                                            |                     |                                       |                     |                                                     |                     |                                                                |                     | GLASS 22           |
| Strawberries                                                                               |                                   | 1014      |                         |                     |      |                                         |                                            |                     |                                       |                     |                                                     |                     |                                                                |                     | OTHER (SPECIFY) 23 |

SECTION I: CONSUMPTION OF FOOD OVER PAST ONE WEEK

PROMPT FOR EACH ITEM ON THE LIST.

| Over the past one week (7 days), did household acquire / purchased / consumed any [ . . ]? | I01                               | I02       | I03                     |                     |      | I04                                     | I05                                        |                     | I05A                                  |                     | I06                                                 |                     | I07                                                            |                     |                 |    |
|--------------------------------------------------------------------------------------------|-----------------------------------|-----------|-------------------------|---------------------|------|-----------------------------------------|--------------------------------------------|---------------------|---------------------------------------|---------------------|-----------------------------------------------------|---------------------|----------------------------------------------------------------|---------------------|-----------------|----|
|                                                                                            |                                   |           | How much was purchased? |                     |      | How much of the purchased was consumed? | How much was consumed from own-production? |                     | How much was consumed from own stock? |                     | How much was consumed from gifts and other sources? |                     | How much in total did your household consume in the past week? |                     |                 |    |
|                                                                                            | YES 1<br>NO 2<br><br>(»NEXT ITEM) | ITEM CODE | QUANTITY                | UNIT CODES AT RIGHT | KSHS | QUANTITY                                | QUANTITY                                   | UNIT CODES AT RIGHT | QUANTITY                              | UNIT CODES AT RIGHT | QUANTITY                                            | UNIT CODES AT RIGHT | QUANTITY                                                       | UNIT CODES AT RIGHT |                 |    |
| Melons                                                                                     |                                   | 1015      |                         |                     |      |                                         |                                            |                     |                                       |                     |                                                     |                     |                                                                |                     | KILOGRAMS       | 01 |
| Grapes                                                                                     |                                   | 1016      |                         |                     |      |                                         |                                            |                     |                                       |                     |                                                     |                     |                                                                |                     | GRAMS           | 02 |
| Coconut                                                                                    |                                   | 1017      |                         |                     |      |                                         |                                            |                     |                                       |                     |                                                     |                     |                                                                |                     | LITRE           | 03 |
| Strawberries                                                                               |                                   | 1018      |                         |                     |      |                                         |                                            |                     |                                       |                     |                                                     |                     |                                                                |                     | MILLILITRE      | 04 |
| Other berries                                                                              |                                   | 1019      |                         |                     |      |                                         |                                            |                     |                                       |                     |                                                     |                     |                                                                |                     | 5 KG. BAG       | 05 |
| Sugar cane                                                                                 |                                   | 1024      |                         |                     |      |                                         |                                            |                     |                                       |                     |                                                     |                     |                                                                |                     | 25 KG. BAG      | 06 |
| Squashes                                                                                   |                                   | 1020      |                         |                     |      |                                         |                                            |                     |                                       |                     |                                                     |                     |                                                                |                     | 50 KG. BAG      | 07 |
| Health Drink                                                                               |                                   | 1021      |                         |                     |      |                                         |                                            |                     |                                       |                     |                                                     |                     |                                                                |                     | 90 KG. BAG      | 08 |
| Preserved fruit, juice                                                                     |                                   | 1022      |                         |                     |      |                                         |                                            |                     |                                       |                     |                                                     |                     |                                                                |                     | DEBE            | 09 |
| Other fruits (specify)                                                                     |                                   | 1023      |                         |                     |      |                                         |                                            |                     |                                       |                     |                                                     |                     |                                                                |                     | TABLE SPOON     | 10 |
| Sugar                                                                                      |                                   | 1100      |                         |                     |      |                                         |                                            |                     |                                       |                     |                                                     |                     |                                                                |                     | BUNCH           | 11 |
| Sugar                                                                                      |                                   | 1101      |                         |                     |      |                                         |                                            |                     |                                       |                     |                                                     |                     |                                                                |                     | PIECE/NUMBER    | 12 |
| Jaggery (Nguru)                                                                            |                                   | 1102      |                         |                     |      |                                         |                                            |                     |                                       |                     |                                                     |                     |                                                                |                     | HEAP            | 13 |
| Sugar-icing                                                                                |                                   | 1103      |                         |                     |      |                                         |                                            |                     |                                       |                     |                                                     |                     |                                                                |                     | HANDFUL         | 14 |
| Other sugar (confectionary, etc)                                                           |                                   | 1104      |                         |                     |      |                                         |                                            |                     |                                       |                     |                                                     |                     |                                                                |                     | PAKAACHA        | 15 |
| Jam, Honey, Sweets and candies                                                             |                                   | 1200      |                         |                     |      |                                         |                                            |                     |                                       |                     |                                                     |                     |                                                                |                     | GOROGORO        | 16 |
| Jam                                                                                        |                                   | 1201      |                         |                     |      |                                         |                                            |                     |                                       |                     |                                                     |                     |                                                                |                     | 1/4 KG TIN      | 17 |
| Marmalade                                                                                  |                                   | 1202      |                         |                     |      |                                         |                                            |                     |                                       |                     |                                                     |                     |                                                                |                     | 1/2 KG TIN      | 18 |
| Honey                                                                                      |                                   | 1203      |                         |                     |      |                                         |                                            |                     |                                       |                     |                                                     |                     |                                                                |                     | 1 KG TIN        | 19 |
| Chocolate                                                                                  |                                   | 1204      |                         |                     |      |                                         |                                            |                     |                                       |                     |                                                     |                     |                                                                |                     | BOWL            | 20 |
| Sweets                                                                                     |                                   | 1205      |                         |                     |      |                                         |                                            |                     |                                       |                     |                                                     |                     |                                                                |                     | CUP             | 21 |
| Chewing gum                                                                                |                                   | 1206      |                         |                     |      |                                         |                                            |                     |                                       |                     |                                                     |                     |                                                                |                     | GLASS           | 22 |
|                                                                                            |                                   |           |                         |                     |      |                                         |                                            |                     |                                       |                     |                                                     |                     |                                                                |                     | OTHER (SPECIFY) | 23 |

SECTION I: CONSUMPTION OF FOOD OVER PAST ONE WEEK

PROMPT FOR EACH ITEM ON THE LIST.

| Over the past one week (7 days), did household acquire / purchased / consumed any [ . . ]? | I01           | I02       | I03<br>How much was purchased? |                     |      | I04<br>How much of the purchased was consumed? | I05<br>How much was consumed from own-production? |                     | I05A<br>How much was consumed from own stock? |                     | I06<br>How much was consumed from gifts and other sources? |                     | I07<br>How much in total did your household consume in the past week? |                     |  |                    |
|--------------------------------------------------------------------------------------------|---------------|-----------|--------------------------------|---------------------|------|------------------------------------------------|---------------------------------------------------|---------------------|-----------------------------------------------|---------------------|------------------------------------------------------------|---------------------|-----------------------------------------------------------------------|---------------------|--|--------------------|
|                                                                                            | YES 1<br>NO 2 |           |                                |                     |      |                                                |                                                   |                     |                                               |                     |                                                            |                     |                                                                       |                     |  |                    |
|                                                                                            | (»NEXT ITEM)  | ITEM CODE | QUANTITY                       | UNIT CODES AT RIGHT | KSHS | QUANTITY                                       | QUANTITY                                          | UNIT CODES AT RIGHT | QUANTITY                                      | UNIT CODES AT RIGHT | QUANTITY                                                   | UNIT CODES AT RIGHT | QUANTITY                                                              | UNIT CODES AT RIGHT |  |                    |
| <b>Beverages for drinking</b>                                                              |               | 1300      |                                |                     |      |                                                |                                                   |                     |                                               |                     |                                                            |                     |                                                                       |                     |  | KILOGRAMS 01       |
| Drinking chocolate/other cocoa preparations                                                |               | 1301      |                                |                     |      |                                                |                                                   |                     |                                               |                     |                                                            |                     |                                                                       |                     |  | GRAMS 02           |
| Soya drink                                                                                 |               | 1302      |                                |                     |      |                                                |                                                   |                     |                                               |                     |                                                            |                     |                                                                       |                     |  | LITRE 03           |
| Coffee - instant                                                                           |               | 1303      |                                |                     |      |                                                |                                                   |                     |                                               |                     |                                                            |                     |                                                                       |                     |  | MILLILITRE 04      |
| Grounded coffee                                                                            |               | 1304      |                                |                     |      |                                                |                                                   |                     |                                               |                     |                                                            |                     |                                                                       |                     |  | 5 KG. BAG 05       |
| Tea Leaves                                                                                 |               | 1305      |                                |                     |      |                                                |                                                   |                     |                                               |                     |                                                            |                     |                                                                       |                     |  | 25 KG. BAG 06      |
| Tea Bags                                                                                   |               | 1306      |                                |                     |      |                                                |                                                   |                     |                                               |                     |                                                            |                     |                                                                       |                     |  | 50 KG. BAG 07      |
| <b>Non-alcoholic beverages</b>                                                             |               | 1400      |                                |                     |      |                                                |                                                   |                     |                                               |                     |                                                            |                     |                                                                       |                     |  | 90 KG. BAG 08      |
| Mineral water                                                                              |               | 1401      |                                |                     |      |                                                |                                                   |                     |                                               |                     |                                                            |                     |                                                                       |                     |  | DEBE 09            |
| sodas                                                                                      |               | 1402      |                                |                     |      |                                                |                                                   |                     |                                               |                     |                                                            |                     |                                                                       |                     |  | TABLE SPOON 10     |
| <b>Alcoholic beverages</b>                                                                 |               | 1500      |                                |                     |      |                                                |                                                   |                     |                                               |                     |                                                            |                     |                                                                       |                     |  | BUNCH 11           |
| Spirits                                                                                    |               | 1501      |                                |                     |      |                                                |                                                   |                     |                                               |                     |                                                            |                     |                                                                       |                     |  | PIECE/NUMBER 12    |
| Wine                                                                                       |               | 1502      |                                |                     |      |                                                |                                                   |                     |                                               |                     |                                                            |                     |                                                                       |                     |  | HEAP 13            |
| Beer                                                                                       |               | 1503      |                                |                     |      |                                                |                                                   |                     |                                               |                     |                                                            |                     |                                                                       |                     |  | HANDFUL 14         |
| Traditional brew - muratina, buzaa ,chang'aa                                               |               | 1504      |                                |                     |      |                                                |                                                   |                     |                                               |                     |                                                            |                     |                                                                       |                     |  | PAKAACHA 15        |
| Cider                                                                                      |               | 1505      |                                |                     |      |                                                |                                                   |                     |                                               |                     |                                                            |                     |                                                                       |                     |  | GOROGORO 16        |
| <b>Tobacco</b>                                                                             |               | 1600      |                                |                     |      |                                                |                                                   |                     |                                               |                     |                                                            |                     |                                                                       |                     |  | 1/4 KG TIN 17      |
| Cigarettes                                                                                 |               | 1601      |                                |                     |      |                                                |                                                   |                     |                                               |                     |                                                            |                     |                                                                       |                     |  | 1/2 KG TIN 18      |
| Tobacco -processed                                                                         |               | 1602      |                                |                     |      |                                                |                                                   |                     |                                               |                     |                                                            |                     |                                                                       |                     |  | 1 KG TIN 19        |
| Tobacco -raw                                                                               |               | 1603      |                                |                     |      |                                                |                                                   |                     |                                               |                     |                                                            |                     |                                                                       |                     |  | BOWL 20            |
| Cigars                                                                                     |               | 1604      |                                |                     |      |                                                |                                                   |                     |                                               |                     |                                                            |                     |                                                                       |                     |  | CUP 21             |
| Snuff                                                                                      |               | 1605      |                                |                     |      |                                                |                                                   |                     |                                               |                     |                                                            |                     |                                                                       |                     |  | GLASS 22           |
| Miraa (Khat)                                                                               |               | 1606      |                                |                     |      |                                                |                                                   |                     |                                               |                     |                                                            |                     |                                                                       |                     |  | OTHER (SPECIFY) 23 |

SECTION I: CONSUMPTION OF FOOD OVER PAST ONE WEEK

PROMPT FOR EACH ITEM ON THE LIST.

| Over the past one week (7 days), did household acquire / purchased / consumed any [ . . ]? | I01                               | I02       | I03                     |                     |      | I04                                     | I05                                        |                     | I05A                                  |                     | I06                                                 |                     | I07                                                            |                     |                    |
|--------------------------------------------------------------------------------------------|-----------------------------------|-----------|-------------------------|---------------------|------|-----------------------------------------|--------------------------------------------|---------------------|---------------------------------------|---------------------|-----------------------------------------------------|---------------------|----------------------------------------------------------------|---------------------|--------------------|
|                                                                                            |                                   |           | How much was purchased? |                     |      | How much of the purchased was consumed? | How much was consumed from own-production? |                     | How much was consumed from own stock? |                     | How much was consumed from gifts and other sources? |                     | How much in total did your household consume in the past week? |                     |                    |
|                                                                                            | YES 1<br>NO 2<br><br>(»NEXT ITEM) | ITEM CODE | QUANTITY                | UNIT CODES AT RIGHT | KSHS | QUANTITY                                | QUANTITY                                   | UNIT CODES AT RIGHT | QUANTITY                              | UNIT CODES AT RIGHT | QUANTITY                                            | UNIT CODES AT RIGHT | QUANTITY                                                       | UNIT CODES AT RIGHT |                    |
| Spices & Miscellaneous                                                                     |                                   | 1700      |                         |                     |      |                                         |                                            |                     |                                       |                     |                                                     |                     |                                                                |                     | KILOGRAMS 01       |
| Salt                                                                                       |                                   | 1701      |                         |                     |      |                                         |                                            |                     |                                       |                     |                                                     |                     |                                                                |                     | GRAMS 02           |
| Tomato sauce                                                                               |                                   | 1702      |                         |                     |      |                                         |                                            |                     |                                       |                     |                                                     |                     |                                                                |                     | LITRE 03           |
| Chilli sauce                                                                               |                                   | 1703      |                         |                     |      |                                         |                                            |                     |                                       |                     |                                                     |                     |                                                                |                     | MILLILITRE 04      |
| Other spices (Specify)                                                                     |                                   | 1704      |                         |                     |      |                                         |                                            |                     |                                       |                     |                                                     |                     |                                                                |                     | 5 KG. BAG 05       |
| Baking Powder /Bicarbonate                                                                 |                                   | 1705      |                         |                     |      |                                         |                                            |                     |                                       |                     |                                                     |                     |                                                                |                     | 25 KG. BAG 06      |
| Yeast                                                                                      |                                   | 1706      |                         |                     |      |                                         |                                            |                     |                                       |                     |                                                     |                     |                                                                |                     | 50 KG. BAG 07      |
| Mustard                                                                                    |                                   | 1707      |                         |                     |      |                                         |                                            |                     |                                       |                     |                                                     |                     |                                                                |                     | 90 KG. BAG 08      |
| Tomato Sauce                                                                               |                                   | 1708      |                         |                     |      |                                         |                                            |                     |                                       |                     |                                                     |                     |                                                                |                     | DEBE 09            |
| Vinegar                                                                                    |                                   | 1709      |                         |                     |      |                                         |                                            |                     |                                       |                     |                                                     |                     |                                                                |                     | TABLE SPOON 10     |
| Pickles                                                                                    |                                   | 1710      |                         |                     |      |                                         |                                            |                     |                                       |                     |                                                     |                     |                                                                |                     | BUNCH 11           |
| Tinned products                                                                            |                                   | 1800      |                         |                     |      |                                         |                                            |                     |                                       |                     |                                                     |                     |                                                                |                     | PIECE/NUMBER 12    |
| Tinned Beans                                                                               |                                   | 1801      |                         |                     |      |                                         |                                            |                     |                                       |                     |                                                     |                     |                                                                |                     | HEAP 13            |
| Tinned pulses                                                                              |                                   | 1802      |                         |                     |      |                                         |                                            |                     |                                       |                     |                                                     |                     |                                                                |                     | HANDFUL 14         |
| Tinned /packeted soups (vegetables)                                                        |                                   | 1803      |                         |                     |      |                                         |                                            |                     |                                       |                     |                                                     |                     |                                                                |                     | PAKAACHA 15        |
| Tinned /packeted soups (meat)                                                              |                                   | 1804      |                         |                     |      |                                         |                                            |                     |                                       |                     |                                                     |                     |                                                                |                     | GOROGORO 16        |
| Tinned fish                                                                                |                                   | 1805      |                         |                     |      |                                         |                                            |                     |                                       |                     |                                                     |                     |                                                                |                     | 1/4 KG TIN 17      |
| Baby food- Cereals (tinned)                                                                |                                   | 1806      |                         |                     |      |                                         |                                            |                     |                                       |                     |                                                     |                     |                                                                |                     | 1/2 KG TIN 18      |
| Cooked/Prepared Foods from Vendors                                                         |                                   | 1900      |                         |                     |      |                                         |                                            |                     |                                       |                     |                                                     |                     |                                                                |                     | 1 KG TIN 19        |
| Food from Vendors                                                                          |                                   | 1901      |                         |                     |      |                                         |                                            |                     |                                       |                     |                                                     |                     |                                                                |                     | BOWL 20            |
| Cafe and take-aways: food                                                                  |                                   | 1902      |                         |                     |      |                                         |                                            |                     |                                       |                     |                                                     |                     |                                                                |                     | CUP 21             |
| Kiosks: food                                                                               |                                   | 1903      |                         |                     |      |                                         |                                            |                     |                                       |                     |                                                     |                     |                                                                |                     | GLASS 22           |
| Restaurants and hotels: food                                                               |                                   | 1904      |                         |                     |      |                                         |                                            |                     |                                       |                     |                                                     |                     |                                                                |                     | OTHER (SPECIFY) 23 |

SECTION J: REGULAR NON FOOD ITEMS EXPENDITURES - PAST ONE MONTH

PROMPT FOR EACH ITEM ON THE LIST.

| Over the past one month, did any member of the household acquire/purchase /consume any [ . . . ]? | J01           | J02       | J03                     |                         |      | J04                                                |                         |      |
|---------------------------------------------------------------------------------------------------|---------------|-----------|-------------------------|-------------------------|------|----------------------------------------------------|-------------------------|------|
|                                                                                                   | YES 1<br>NO 2 |           | How much was purchased? |                         |      | How much was acquired/obtained from other sources? |                         |      |
|                                                                                                   | (»NEXT ITEM)  | ITEM CODE | QUANTITY                | UNIT CODES IN SECTION I | KSHS | QUANTITY                                           | UNIT CODES IN SECTION I | KSHS |
| Household Operation                                                                               |               | 2000      |                         |                         |      |                                                    |                         |      |
| Household Soap/bar soap                                                                           |               | 2001      |                         |                         |      |                                                    |                         |      |
| Detergents                                                                                        |               | 2002      |                         |                         |      |                                                    |                         |      |
| Dish washing paste/liquid                                                                         |               | 2003      |                         |                         |      |                                                    |                         |      |
| insecticide                                                                                       |               | 2004      |                         |                         |      |                                                    |                         |      |
| Disinfectant                                                                                      |               | 2005      |                         |                         |      |                                                    |                         |      |
| Air freshener                                                                                     |               | 2006      |                         |                         |      |                                                    |                         |      |
| Floor polish                                                                                      |               | 2007      |                         |                         |      |                                                    |                         |      |
| Broom                                                                                             |               | 2008      |                         |                         |      |                                                    |                         |      |
| Mop/Duster                                                                                        |               | 2009      |                         |                         |      |                                                    |                         |      |
| Shoe polish /Cream                                                                                |               | 2010      |                         |                         |      |                                                    |                         |      |
| Match box                                                                                         |               | 2011      |                         |                         |      |                                                    |                         |      |
| Candles                                                                                           |               | 2012      |                         |                         |      |                                                    |                         |      |
| Laundry (clothes)                                                                                 |               | 2013      |                         |                         |      |                                                    |                         |      |
| Laundry (others specify)                                                                          |               | 2014      |                         |                         |      |                                                    |                         |      |
| Personal Care and Effects                                                                         |               | 3000      |                         |                         |      |                                                    |                         |      |
| Hair cut (men)                                                                                    |               | 3001      |                         |                         |      |                                                    |                         |      |
| Sanitary pads                                                                                     |               | 3002      |                         |                         |      |                                                    |                         |      |
| Cotton wool                                                                                       |               | 3003      |                         |                         |      |                                                    |                         |      |
| Baby oil                                                                                          |               | 3004      |                         |                         |      |                                                    |                         |      |
| Baby powder                                                                                       |               | 3005      |                         |                         |      |                                                    |                         |      |
| Hair oil                                                                                          |               | 3006      |                         |                         |      |                                                    |                         |      |
| Hair oil                                                                                          |               | 3007      |                         |                         |      |                                                    |                         |      |

PROMPT FOR EACH ITEM ON THE LIST.

| Over the past one month, did any member of the household acquire / purchase / consume any [ . . . ]? | J01           | J02       | J03                     |                         |      | J04                                                |                         |      |
|------------------------------------------------------------------------------------------------------|---------------|-----------|-------------------------|-------------------------|------|----------------------------------------------------|-------------------------|------|
|                                                                                                      | YES 1<br>NO 2 |           | How much was purchased? |                         |      | How much was acquired/obtained from other sources? |                         |      |
|                                                                                                      | (»NEXT ITEM)  | ITEM CODE | QUANTITY                | UNIT CODES IN SECTION I | KSHS | QUANTITY                                           | UNIT CODES IN SECTION I | KSHS |
| Personal Care and Effects                                                                            |               | 3000      |                         |                         |      |                                                    |                         |      |
| Perfume                                                                                              |               | 3008      |                         |                         |      |                                                    |                         |      |
| Other toiletries specify)                                                                            |               | 3009      |                         |                         |      |                                                    |                         |      |
| Other cosmetics specify)                                                                             |               | 3010      |                         |                         |      |                                                    |                         |      |
| Massage                                                                                              |               | 3011      |                         |                         |      |                                                    |                         |      |
| Hair dressing (women)                                                                                |               | 3012      |                         |                         |      |                                                    |                         |      |
| massage (ladies)                                                                                     |               | 3013      |                         |                         |      |                                                    |                         |      |
| Razor/Blade                                                                                          |               | 3014      |                         |                         |      |                                                    |                         |      |
| Combs                                                                                                |               | 3015      |                         |                         |      |                                                    |                         |      |
| Toothbrush                                                                                           |               | 3016      |                         |                         |      |                                                    |                         |      |
| Toilet soap                                                                                          |               | 3017      |                         |                         |      |                                                    |                         |      |
| Toilet paper                                                                                         |               | 3018      |                         |                         |      |                                                    |                         |      |
| Toothpaste                                                                                           |               | 3019      |                         |                         |      |                                                    |                         |      |
| After Shave lotion                                                                                   |               | 3020      |                         |                         |      |                                                    |                         |      |
| Body lotion                                                                                          |               | 3021      |                         |                         |      |                                                    |                         |      |
| Hair cream                                                                                           |               | 3022      |                         |                         |      |                                                    |                         |      |
| Shampoo/conditioner                                                                                  |               | 3023      |                         |                         |      |                                                    |                         |      |
| Deodorant                                                                                            |               | 3024      |                         |                         |      |                                                    |                         |      |
| Tissue paper/Handkerchiefs                                                                           |               | 3025      |                         |                         |      |                                                    |                         |      |
| Petroleum jelly                                                                                      |               | 3026      |                         |                         |      |                                                    |                         |      |
| Nail polish                                                                                          |               | 3027      |                         |                         |      |                                                    |                         |      |
| Lipstick                                                                                             |               | 3028      |                         |                         |      |                                                    |                         |      |
| Eye make-ups                                                                                         |               | 3029      |                         |                         |      |                                                    |                         |      |

SECTION J: REGULAR NON FOOD ITEMS EXPENDITURES - PAST ONE MONTH

PROMPT FOR EACH ITEM ON THE LIST.

| Over the past one month, did any member of the household acquire/purchase /consume any [. . .]? | J01           | J02       | J03                     |                         |      | J04                                                |                         |      |
|-------------------------------------------------------------------------------------------------|---------------|-----------|-------------------------|-------------------------|------|----------------------------------------------------|-------------------------|------|
|                                                                                                 | YES 1<br>NO 2 |           | How much was purchased? |                         |      | How much was acquired/obtained from other sources? |                         |      |
|                                                                                                 | (»NEXT ITEM)  | ITEM CODE | QUANTITY                | UNIT CODES IN SECTION I | KSHS | QUANTITY                                           | UNIT CODES IN SECTION I | KSHS |
| Medical Care                                                                                    |               | 3100      |                         |                         |      |                                                    |                         |      |
| Medicines - Antiworms                                                                           |               | 3101      |                         |                         |      |                                                    |                         |      |
| Liver salts and other anti-acids                                                                |               | 3102      |                         |                         |      |                                                    |                         |      |
| Cold tablets/cough syrup                                                                        |               | 3103      |                         |                         |      |                                                    |                         |      |
| Herbal medicine                                                                                 |               | 3104      |                         |                         |      |                                                    |                         |      |
| Balms (healing ointments)                                                                       |               | 3105      |                         |                         |      |                                                    |                         |      |
| Vaccines                                                                                        |               | 3106      |                         |                         |      |                                                    |                         |      |
| Contraceptives                                                                                  |               | 3107      |                         |                         |      |                                                    |                         |      |
| Adhesive bandage                                                                                |               | 3108      |                         |                         |      |                                                    |                         |      |
| Syringes                                                                                        |               | 3109      |                         |                         |      |                                                    |                         |      |
| Multivitamin/other medicine                                                                     |               | 3110      |                         |                         |      |                                                    |                         |      |
| Fever/Pain killers e.g. paracetamol                                                             |               | 3111      |                         |                         |      |                                                    |                         |      |
| Medicine anti-malaria                                                                           |               | 3112      |                         |                         |      |                                                    |                         |      |
| Cod/halibut liver oil                                                                           |               | 3113      |                         |                         |      |                                                    |                         |      |
| Transport and Communication                                                                     |               | 3200      |                         |                         |      |                                                    |                         |      |
| Petrol                                                                                          |               | 3201      |                         |                         |      |                                                    |                         |      |
| Diesel                                                                                          |               | 3202      |                         |                         |      |                                                    |                         |      |
| Ferry/road tolls                                                                                |               | 3203      |                         |                         |      |                                                    |                         |      |
| Taxi Fare                                                                                       |               | 3204      |                         |                         |      |                                                    |                         |      |
| Parking charges                                                                                 |               | 3205      |                         |                         |      |                                                    |                         |      |
| City bus fares                                                                                  |               | 3206      |                         |                         |      |                                                    |                         |      |
| Country bus fare                                                                                |               | 3207      |                         |                         |      |                                                    |                         |      |
| Matatu fares                                                                                    |               | 3208      |                         |                         |      |                                                    |                         |      |

PROMPT FOR EACH ITEM ON THE LIST.

| Over the past one month, did any member of the household acquire / purchase / consume any [. . .]? | J01           | J02       | J03                     |                         |      | J04                                                |                         |      |
|----------------------------------------------------------------------------------------------------|---------------|-----------|-------------------------|-------------------------|------|----------------------------------------------------|-------------------------|------|
|                                                                                                    | YES 1<br>NO 2 |           | How much was purchased? |                         |      | How much was acquired/obtained from other sources? |                         |      |
|                                                                                                    | (»NEXT ITEM)  | ITEM CODE | QUANTITY                | UNIT CODES IN SECTION I | KSHS | QUANTITY                                           | UNIT CODES IN SECTION I | KSHS |
| Transport and Communication                                                                        |               | 3200      |                         |                         |      |                                                    |                         |      |
| Boda boda fares                                                                                    |               | 3209      |                         |                         |      |                                                    |                         |      |
| Train fares                                                                                        |               | 3210      |                         |                         |      |                                                    |                         |      |
| Local flights                                                                                      |               | 3211      |                         |                         |      |                                                    |                         |      |
| Local calls                                                                                        |               | 3212      |                         |                         |      |                                                    |                         |      |
| Trunk calls                                                                                        |               | 3213      |                         |                         |      |                                                    |                         |      |
| Cell phone airtime                                                                                 |               | 3214      |                         |                         |      |                                                    |                         |      |
| Internet costs                                                                                     |               | 3215      |                         |                         |      |                                                    |                         |      |
| Refuse collection                                                                                  |               | 3216      |                         |                         |      |                                                    |                         |      |
| Fuel and Power                                                                                     |               | 3300      |                         |                         |      |                                                    |                         |      |
| Electricity                                                                                        |               | 3301      |                         |                         |      |                                                    |                         |      |
| GAS/LPG                                                                                            |               | 3302      |                         |                         |      |                                                    |                         |      |
| Kerosene/Paraffin                                                                                  |               | 3303      |                         |                         |      |                                                    |                         |      |
| Firewood                                                                                           |               | 3304      |                         |                         |      |                                                    |                         |      |
| Charcoal                                                                                           |               | 3305      |                         |                         |      |                                                    |                         |      |
| Other cooking fuels                                                                                |               | 3306      |                         |                         |      |                                                    |                         |      |
| Water                                                                                              |               | 3307      |                         |                         |      |                                                    |                         |      |
|                                                                                                    |               |           |                         |                         |      |                                                    |                         |      |
|                                                                                                    |               |           |                         |                         |      |                                                    |                         |      |
|                                                                                                    |               |           |                         |                         |      |                                                    |                         |      |
|                                                                                                    |               |           |                         |                         |      |                                                    |                         |      |
|                                                                                                    |               |           |                         |                         |      |                                                    |                         |      |
|                                                                                                    |               |           |                         |                         |      |                                                    |                         |      |
|                                                                                                    |               |           |                         |                         |      |                                                    |                         |      |

SECTION K: NON FOOD ITEMS EXPENDITURES - PAST ONE MONTH

PROMPT FOR EACH ITEM ON THE LIST.

| Over the past one month, did any member of the household acquire, purchase or consumed any [...]? | K0                               | K02       | K03                              |                            |      | K04                                                |                            |      |
|---------------------------------------------------------------------------------------------------|----------------------------------|-----------|----------------------------------|----------------------------|------|----------------------------------------------------|----------------------------|------|
|                                                                                                   | YES 1<br>NO 2<br>(>NEXT<br>ITEM) | ITEM CODE | How much was purchased/paid for? |                            |      | How much was acquired/obtained from other sources? |                            |      |
|                                                                                                   |                                  |           | QUANTITY                         | UNIT CODES<br>IN SECTION I | KSHS | QUANTITY                                           | UNIT CODES<br>IN SECTION I | KSHS |
|                                                                                                   |                                  |           |                                  |                            |      |                                                    |                            |      |
| Domestic Services                                                                                 |                                  | 3300      |                                  |                            |      |                                                    |                            |      |
| Domestic workers                                                                                  |                                  | 3301      |                                  |                            |      |                                                    |                            |      |
| Upkeep of Housing Unit                                                                            |                                  | 3400      |                                  |                            |      |                                                    |                            |      |
| Maintenance and repair                                                                            |                                  | 3401      |                                  |                            |      |                                                    |                            |      |
| Additions/improvement                                                                             |                                  | 3402      |                                  |                            |      |                                                    |                            |      |
| Additions/improvement (owner occupiers)                                                           |                                  | 3403      |                                  |                            |      |                                                    |                            |      |
| Personal Goods                                                                                    |                                  | 3500      |                                  |                            |      |                                                    |                            |      |
| Jewelers                                                                                          |                                  | 3501      |                                  |                            |      |                                                    |                            |      |
| Belts                                                                                             |                                  | 3502      |                                  |                            |      |                                                    |                            |      |
| Watches                                                                                           |                                  | 3503      |                                  |                            |      |                                                    |                            |      |
| Purses/handbags (ladies)                                                                          |                                  | 3504      |                                  |                            |      |                                                    |                            |      |
| wallets (men)                                                                                     |                                  | 3505      |                                  |                            |      |                                                    |                            |      |
| Suitcase/brief cases                                                                              |                                  | 3506      |                                  |                            |      |                                                    |                            |      |
| Travel bags                                                                                       |                                  | 3507      |                                  |                            |      |                                                    |                            |      |
| Umbrellas                                                                                         |                                  | 3508      |                                  |                            |      |                                                    |                            |      |
| Batteries (dry cells)                                                                             |                                  | 3509      |                                  |                            |      |                                                    |                            |      |
| Personal Torches                                                                                  |                                  | 3510      |                                  |                            |      |                                                    |                            |      |
| Clock                                                                                             |                                  | 3511      |                                  |                            |      |                                                    |                            |      |
| Smoke Pipes                                                                                       |                                  | 3512      |                                  |                            |      |                                                    |                            |      |
| Lighters                                                                                          |                                  | 3513      |                                  |                            |      |                                                    |                            |      |
| Recreation and Entertainment                                                                      |                                  | 3600      |                                  |                            |      |                                                    |                            |      |
| Video Cassette hire                                                                               |                                  | 3601      |                                  |                            |      |                                                    |                            |      |
| Films purchase/developing                                                                         |                                  | 3602      |                                  |                            |      |                                                    |                            |      |

PROMPT FOR EACH ITEM ON THE LIST.

| Over the past one month, did any member of the household acquire, purchase or consumed any [...]? | K01                              | K02       | K03                              |                       |      | K04                                                |                       |      |
|---------------------------------------------------------------------------------------------------|----------------------------------|-----------|----------------------------------|-----------------------|------|----------------------------------------------------|-----------------------|------|
|                                                                                                   | YES 1<br>NO 2<br>(>NEXT<br>ITEM) | ITEM CODE | How much was purchased/paid for? |                       |      | How much was acquired/obtained from other sources? |                       |      |
|                                                                                                   |                                  |           | QUANTITY                         | CODES IN<br>SECTION I | KSHS | QUANTITY                                           | CODES IN<br>SECTION I | KSHS |
|                                                                                                   |                                  |           |                                  |                       |      |                                                    |                       |      |
| Recreation and Entertainment                                                                      |                                  | 3600      |                                  |                       |      |                                                    |                       |      |
| cinema entry fees                                                                                 |                                  | 3603      |                                  |                       |      |                                                    |                       |      |
| Stadium entrance fees                                                                             |                                  | 3604      |                                  |                       |      |                                                    |                       |      |
| National /Game park entry fees                                                                    |                                  | 3605      |                                  |                       |      |                                                    |                       |      |
| Traditional dances                                                                                |                                  | 3606      |                                  |                       |      |                                                    |                       |      |
| Disco/night club entry fees                                                                       |                                  | 3607      |                                  |                       |      |                                                    |                       |      |
| Gambling/lottery tickets                                                                          |                                  | 3608      |                                  |                       |      |                                                    |                       |      |
| Books                                                                                             |                                  | 3609      |                                  |                       |      |                                                    |                       |      |
| Newspapers                                                                                        |                                  | 3610      |                                  |                       |      |                                                    |                       |      |
| Magazines                                                                                         |                                  | 3611      |                                  |                       |      |                                                    |                       |      |
| Pencils/pens/ink                                                                                  |                                  | 3612      |                                  |                       |      |                                                    |                       |      |
| Envelopes-                                                                                        |                                  | 3613      |                                  |                       |      |                                                    |                       |      |
| Writing pad/Exercise books                                                                        |                                  | 3614      |                                  |                       |      |                                                    |                       |      |
| Photocopying                                                                                      |                                  | 3615      |                                  |                       |      |                                                    |                       |      |
| Medical Care                                                                                      |                                  | 3700      |                                  |                       |      |                                                    |                       |      |
| Doctor's service -General Practitioner                                                            |                                  | 3701      |                                  |                       |      |                                                    |                       |      |
| Traditional Doctor's service                                                                      |                                  | 3702      |                                  |                       |      |                                                    |                       |      |
| Specialist                                                                                        |                                  | 3703      |                                  |                       |      |                                                    |                       |      |
| Dental services                                                                                   |                                  | 3704      |                                  |                       |      |                                                    |                       |      |
| Nurses                                                                                            |                                  | 3705      |                                  |                       |      |                                                    |                       |      |
| Spectacles                                                                                        |                                  | 3706      |                                  |                       |      |                                                    |                       |      |
| Optician's services                                                                               |                                  | 3707      |                                  |                       |      |                                                    |                       |      |
| Physiotherapy (out-patients)                                                                      |                                  | 3708      |                                  |                       |      |                                                    |                       |      |

**PROMPT FOR EACH ITEM ON THE LIST.**

**PROMPT FOR EACH ITEM ON THE LIST.**

SECTION L: NON-FOOD EXPENDITURES – PAST ONE MONTH

PROMPT FOR EACH ITEM ON THE LIST.

| Over the past one month, did any member of the household acquire or purchase(paid for) any [...]? | L01                  | L02       | L03                              |                            |      | L04                                                |                            |      |
|---------------------------------------------------------------------------------------------------|----------------------|-----------|----------------------------------|----------------------------|------|----------------------------------------------------|----------------------------|------|
|                                                                                                   | YES 1                |           | How much was purchased/paid for? |                            |      | How much was acquired/obtained from other sources? |                            |      |
|                                                                                                   | NO 2<br>(»NEXT ITEM) | ITEM CODE | QUANTITY                         | UNIT CODES<br>IN SECTION I | KSHS | QUANTITY                                           | UNIT CODES<br>IN SECTION I | KSHS |
| Men's Clothing                                                                                    |                      | 3800      |                                  |                            |      |                                                    |                            |      |
| Men's Coat/Jacket                                                                                 |                      | 3801      |                                  |                            |      |                                                    |                            |      |
| Men's Suit                                                                                        |                      | 3802      |                                  |                            |      |                                                    |                            |      |
| Men's Trousers                                                                                    |                      | 3803      |                                  |                            |      |                                                    |                            |      |
| Men's Shirt                                                                                       |                      | 3804      |                                  |                            |      |                                                    |                            |      |
| Men's Underpants                                                                                  |                      | 3805      |                                  |                            |      |                                                    |                            |      |
| Men's Sweater                                                                                     |                      | 3806      |                                  |                            |      |                                                    |                            |      |
| Men's Vests                                                                                       |                      | 3807      |                                  |                            |      |                                                    |                            |      |
| Men's Socks                                                                                       |                      | 3808      |                                  |                            |      |                                                    |                            |      |
| Men's pyjamas                                                                                     |                      | 3809      |                                  |                            |      |                                                    |                            |      |
| Ties /Scarves                                                                                     |                      | 3810      |                                  |                            |      |                                                    |                            |      |
| Women's Clothing                                                                                  |                      | 3900      |                                  |                            |      |                                                    |                            |      |
| Women's Brassiers                                                                                 |                      | 3901      |                                  |                            |      |                                                    |                            |      |
| Women's stockings                                                                                 |                      | 3902      |                                  |                            |      |                                                    |                            |      |
| Women's slip                                                                                      |                      | 3903      |                                  |                            |      |                                                    |                            |      |
| Women's kitenge 1                                                                                 |                      | 3904      |                                  |                            |      |                                                    |                            |      |
| Headsquare                                                                                        |                      | 3905      |                                  |                            |      |                                                    |                            |      |
| Women's Dress                                                                                     |                      | 3906      |                                  |                            |      |                                                    |                            |      |
| Women's Blouses                                                                                   |                      | 3907      |                                  |                            |      |                                                    |                            |      |
| Women's Skirts                                                                                    |                      | 3908      |                                  |                            |      |                                                    |                            |      |
| Women's Jacket                                                                                    |                      | 3909      |                                  |                            |      |                                                    |                            |      |
| Women's Underwear                                                                                 |                      | 3910      |                                  |                            |      |                                                    |                            |      |
| Women's Sweaters                                                                                  |                      | 3911      |                                  |                            |      |                                                    |                            |      |

PROMPT FOR EACH ITEM ON THE LIST.

| Over the past one month, did any member of the household acquire or purchase(paid for) any [...]? | L01                  | L02       | L03                              |                            |      | L04                                                |                            |      |
|---------------------------------------------------------------------------------------------------|----------------------|-----------|----------------------------------|----------------------------|------|----------------------------------------------------|----------------------------|------|
|                                                                                                   | YES 1                |           | How much was purchased/paid for? |                            |      | How much was acquired/obtained from other sources? |                            |      |
|                                                                                                   | NO 2<br>(»NEXT ITEM) | ITEM CODE | QUANTITY                         | UNIT CODES<br>IN SECTION I | KSHS | QUANTITY                                           | UNIT CODES<br>IN SECTION I | KSHS |
| Women's Clothing                                                                                  |                      | 3900      |                                  |                            |      |                                                    |                            |      |
| Women's Night dress                                                                               |                      | 3912      |                                  |                            |      |                                                    |                            |      |
| Women's Trousers                                                                                  |                      | 3913      |                                  |                            |      |                                                    |                            |      |
| Women's suits                                                                                     |                      | 3914      |                                  |                            |      |                                                    |                            |      |
| Ties /Scarves                                                                                     |                      | 3915      |                                  |                            |      |                                                    |                            |      |
| Children's Clothing                                                                               |                      | 4000      |                                  |                            |      |                                                    |                            |      |
| Shirt                                                                                             |                      | 3901      |                                  |                            |      |                                                    |                            |      |
| Trousers/Shorts                                                                                   |                      | 3902      |                                  |                            |      |                                                    |                            |      |
| Coats/Jackes                                                                                      |                      | 3903      |                                  |                            |      |                                                    |                            |      |
| Suit                                                                                              |                      | 3904      |                                  |                            |      |                                                    |                            |      |
| Sweater                                                                                           |                      | 3905      |                                  |                            |      |                                                    |                            |      |
| Underwear                                                                                         |                      | 3906      |                                  |                            |      |                                                    |                            |      |
| Socks                                                                                             |                      | 3907      |                                  |                            |      |                                                    |                            |      |
| vest                                                                                              |                      | 3908      |                                  |                            |      |                                                    |                            |      |
| Girl's blouse                                                                                     |                      | 3909      |                                  |                            |      |                                                    |                            |      |
| Girl's Skirt                                                                                      |                      | 3910      |                                  |                            |      |                                                    |                            |      |
| Girl's Dress                                                                                      |                      | 3911      |                                  |                            |      |                                                    |                            |      |
| Girl's Slips                                                                                      |                      | 3912      |                                  |                            |      |                                                    |                            |      |
| Girl's Socks                                                                                      |                      | 3913      |                                  |                            |      |                                                    |                            |      |
| Girl's Night dress/Night wear                                                                     |                      | 3914      |                                  |                            |      |                                                    |                            |      |
| Infant's Clothing                                                                                 |                      | 4100      |                                  |                            |      |                                                    |                            |      |
| Shirt                                                                                             |                      | 4101      |                                  |                            |      |                                                    |                            |      |
| Trousers/shorts                                                                                   |                      | 4102      |                                  |                            |      |                                                    |                            |      |

PROMPT FOR EACH ITEM ON THE LIST.

| Over the past one month, did any member of the household acquire or purchase(paid for) any [...]? | L01                              | L02       | L03                              |                            |      | L04                                                |                            |      |
|---------------------------------------------------------------------------------------------------|----------------------------------|-----------|----------------------------------|----------------------------|------|----------------------------------------------------|----------------------------|------|
|                                                                                                   | YES 1<br>NO 2<br>(➤NEXT<br>ITEM) |           | How much was purchased/paid for? |                            |      | How much was acquired/obtained from other sources? |                            |      |
|                                                                                                   |                                  | ITEM CODE | QUANTITY                         | UNIT CODES<br>IN SECTION I | KSHS | QUANTITY                                           | UNIT CODES<br>IN SECTION I | KSHS |
| Infant's Clothing                                                                                 |                                  | 4100      |                                  |                            |      |                                                    |                            |      |
| Coats/jackets                                                                                     |                                  | 4103      |                                  |                            |      |                                                    |                            |      |
| Plastic pants                                                                                     |                                  | 4104      |                                  |                            |      |                                                    |                            |      |
| Bibs                                                                                              |                                  | 4105      |                                  |                            |      |                                                    |                            |      |
| Rompers                                                                                           |                                  | 4106      |                                  |                            |      |                                                    |                            |      |
| Napkins                                                                                           |                                  | 4107      |                                  |                            |      |                                                    |                            |      |
| Sweaters                                                                                          |                                  | 4108      |                                  |                            |      |                                                    |                            |      |
| Suit                                                                                              |                                  | 4109      |                                  |                            |      |                                                    |                            |      |
| Blouse                                                                                            |                                  | 4110      |                                  |                            |      |                                                    |                            |      |
| Skirt                                                                                             |                                  | 4111      |                                  |                            |      |                                                    |                            |      |
| Dress                                                                                             |                                  | 4112      |                                  |                            |      |                                                    |                            |      |
| Socks                                                                                             |                                  | 4113      |                                  |                            |      |                                                    |                            |      |
| Dress /clothing material                                                                          |                                  | 4200      |                                  |                            |      |                                                    |                            |      |
| Kanga /Kikoi                                                                                      |                                  | 4201      |                                  |                            |      |                                                    |                            |      |
| Knitting wool                                                                                     |                                  | 4202      |                                  |                            |      |                                                    |                            |      |
| Thread                                                                                            |                                  | 4203      |                                  |                            |      |                                                    |                            |      |
| Tailoring services                                                                                |                                  | 4204      |                                  |                            |      |                                                    |                            |      |
| Needles                                                                                           |                                  | 4205      |                                  |                            |      |                                                    |                            |      |
| Buttons                                                                                           |                                  | 4206      |                                  |                            |      |                                                    |                            |      |
| Zips                                                                                              |                                  | 4207      |                                  |                            |      |                                                    |                            |      |
| Belts                                                                                             |                                  | 4208      |                                  |                            |      |                                                    |                            |      |
| Needles                                                                                           |                                  | 4209      |                                  |                            |      |                                                    |                            |      |
| Buttons                                                                                           |                                  | 4210      |                                  |                            |      |                                                    |                            |      |
| Zips                                                                                              |                                  | 4211      |                                  |                            |      |                                                    |                            |      |
| Belts                                                                                             |                                  | 4212      |                                  |                            |      |                                                    |                            |      |

PROMPT FOR EACH ITEM ON THE LIST.

| Over the past one month, did any member of the household acquire or purchase(paid for) any [...]? | L01                              | L02       | L03                              |                            |      | L04                                                |                            |      |
|---------------------------------------------------------------------------------------------------|----------------------------------|-----------|----------------------------------|----------------------------|------|----------------------------------------------------|----------------------------|------|
|                                                                                                   | YES 1<br>NO 2<br>(➤NEXT<br>ITEM) |           | How much was purchased/paid for? |                            |      | How much was acquired/obtained from other sources? |                            |      |
|                                                                                                   |                                  | ITEM CODE | QUANTITY                         | UNIT CODES<br>IN SECTION I | KSHS | QUANTITY                                           | UNIT CODES<br>IN SECTION I | KSHS |
| Men's Footwear                                                                                    |                                  | 4300      |                                  |                            |      |                                                    |                            |      |
| Men's Shoes - Leather                                                                             |                                  | 4301      |                                  |                            |      |                                                    |                            |      |
| Men's Shoes - plastic                                                                             |                                  | 4302      |                                  |                            |      |                                                    |                            |      |
| Men's Shoes - Rubber                                                                              |                                  | 4303      |                                  |                            |      |                                                    |                            |      |
| Men's Sports Shoes                                                                                |                                  | 4304      |                                  |                            |      |                                                    |                            |      |
| Men's Rubber Sandals                                                                              |                                  | 4305      |                                  |                            |      |                                                    |                            |      |
| Sandals(Akalas)                                                                                   |                                  | 4306      |                                  |                            |      |                                                    |                            |      |
| Women's Footwear                                                                                  |                                  | 4400      |                                  |                            |      |                                                    |                            |      |
| Women's Shoes - Leather                                                                           |                                  | 4401      |                                  |                            |      |                                                    |                            |      |
| Women's Shoes - Plastic                                                                           |                                  | 4402      |                                  |                            |      |                                                    |                            |      |
| Women's Shoes - Rubber                                                                            |                                  | 4403      |                                  |                            |      |                                                    |                            |      |
| Women's Sports Shoes                                                                              |                                  | 4404      |                                  |                            |      |                                                    |                            |      |
| Women's rubber sandals                                                                            |                                  | 4405      |                                  |                            |      |                                                    |                            |      |
| Boy's Footwear                                                                                    |                                  | 4500      |                                  |                            |      |                                                    |                            |      |
| Boy's shoes - plastic                                                                             |                                  | 4501      |                                  |                            |      |                                                    |                            |      |
| Boy's Sports Shoes                                                                                |                                  | 4502      |                                  |                            |      |                                                    |                            |      |
| Boy's Rubber Sandals                                                                              |                                  | 4503      |                                  |                            |      |                                                    |                            |      |
| Girl's Footwear                                                                                   |                                  | 4600      |                                  |                            |      |                                                    |                            |      |
| Girls' leather shoes                                                                              |                                  | 4601      |                                  |                            |      |                                                    |                            |      |
| Sports's shoes - plastic                                                                          |                                  | 4602      |                                  |                            |      |                                                    |                            |      |
| Girls's Sports Shoes -leather                                                                     |                                  | 4603      |                                  |                            |      |                                                    |                            |      |
| Girls's Rubber Shoes                                                                              |                                  | 4604      |                                  |                            |      |                                                    |                            |      |
| Repair to footwear                                                                                |                                  | 4605      |                                  |                            |      |                                                    |                            |      |
|                                                                                                   |                                  |           |                                  |                            |      |                                                    |                            |      |
|                                                                                                   |                                  |           |                                  |                            |      |                                                    |                            |      |

SECTION M: EXPENDITURES ON DURABLES

PROMPT FOR EACH ITEM ON THE LIST.

| Over the past one year (twelve months),<br>did any member of the household<br>purchase or pay for any [....] | M01                                 | M02                  | M03                               |      | M04                                                                                                            | M05                                      | M06                                                                                                  | M07                                                                                                                                           |
|--------------------------------------------------------------------------------------------------------------|-------------------------------------|----------------------|-----------------------------------|------|----------------------------------------------------------------------------------------------------------------|------------------------------------------|------------------------------------------------------------------------------------------------------|-----------------------------------------------------------------------------------------------------------------------------------------------|
|                                                                                                              | YES...1<br>NO....2<br><b>(»M04)</b> | <b>Item<br/>code</b> | How much did you pay<br>in total? |      | Does your<br>household<br>own any<br>[.....]<br><br>YES.....1<br>NO.....2<br><br><b>&gt;&gt; NEXT<br/>ITEM</b> | How<br>many<br>(ITEMS)<br>do you<br>own? | What is<br>the age of<br>this<br>(ITEM)?<br><b>If more<br/>than one<br/>item<br/>Average<br/>age</b> | If you wanted to<br>sell one of this<br>[ITEM] today,<br>how much would<br>you receive?<br><b>If more than<br/>one item<br/>average value</b> |
|                                                                                                              |                                     |                      | Number                            | KSHS |                                                                                                                | NUMBER                                   | YEARS                                                                                                | KSHS                                                                                                                                          |
| <b>Furniture</b>                                                                                             |                                     | 4700                 |                                   |      |                                                                                                                |                                          |                                                                                                      |                                                                                                                                               |
| Sofa set                                                                                                     |                                     | 4701                 |                                   |      |                                                                                                                |                                          |                                                                                                      |                                                                                                                                               |
| Dining table                                                                                                 |                                     | 4702                 |                                   |      |                                                                                                                |                                          |                                                                                                      |                                                                                                                                               |
| Coffee table                                                                                                 |                                     | 4703                 |                                   |      |                                                                                                                |                                          |                                                                                                      |                                                                                                                                               |
| Dressing table                                                                                               |                                     | 4704                 |                                   |      |                                                                                                                |                                          |                                                                                                      |                                                                                                                                               |
| Writing/study table                                                                                          |                                     | 4705                 |                                   |      |                                                                                                                |                                          |                                                                                                      |                                                                                                                                               |
| Chairs                                                                                                       |                                     | 4706                 |                                   |      |                                                                                                                |                                          |                                                                                                      |                                                                                                                                               |
| Bed                                                                                                          |                                     | 4707                 |                                   |      |                                                                                                                |                                          |                                                                                                      |                                                                                                                                               |
| Stools wooden                                                                                                |                                     | 4708                 |                                   |      |                                                                                                                |                                          |                                                                                                      |                                                                                                                                               |
| Book shelves                                                                                                 |                                     | 4709                 |                                   |      |                                                                                                                |                                          |                                                                                                      |                                                                                                                                               |
| Wardrobes                                                                                                    |                                     | 4710                 |                                   |      |                                                                                                                |                                          |                                                                                                      |                                                                                                                                               |
| iron board                                                                                                   |                                     | 4711                 |                                   |      |                                                                                                                |                                          |                                                                                                      |                                                                                                                                               |
| Side board                                                                                                   |                                     | 4712                 |                                   |      |                                                                                                                |                                          |                                                                                                      |                                                                                                                                               |
| Chest of drawers                                                                                             |                                     | 4713                 |                                   |      |                                                                                                                |                                          |                                                                                                      |                                                                                                                                               |
| Wall unit                                                                                                    |                                     | 4714                 |                                   |      |                                                                                                                |                                          |                                                                                                      |                                                                                                                                               |
| <b>Baby Goods</b>                                                                                            |                                     | 4800                 |                                   |      |                                                                                                                |                                          |                                                                                                      |                                                                                                                                               |
| Baby furniture                                                                                               |                                     | 4801                 |                                   |      |                                                                                                                |                                          |                                                                                                      |                                                                                                                                               |
| Baby carriages/prams                                                                                         |                                     | 4802                 |                                   |      |                                                                                                                |                                          |                                                                                                      |                                                                                                                                               |
| Baby cot                                                                                                     |                                     | 4803                 |                                   |      |                                                                                                                |                                          |                                                                                                      |                                                                                                                                               |
| Walkers                                                                                                      |                                     | 4804                 |                                   |      |                                                                                                                |                                          |                                                                                                      |                                                                                                                                               |
| Feeding bottle                                                                                               |                                     | 4805                 |                                   |      |                                                                                                                |                                          |                                                                                                      |                                                                                                                                               |
| Potty                                                                                                        |                                     | 4806                 |                                   |      |                                                                                                                |                                          |                                                                                                      |                                                                                                                                               |

| Over the past one year (twelve months), did any member of the household purchase or pay for any [...] | M01                | M02          | M03                            |      | M04                                                                      | M05                          | M06                                                                                   | M07                                                                                                                                 |
|-------------------------------------------------------------------------------------------------------|--------------------|--------------|--------------------------------|------|--------------------------------------------------------------------------|------------------------------|---------------------------------------------------------------------------------------|-------------------------------------------------------------------------------------------------------------------------------------|
|                                                                                                       | NO.....2<br>(»M04) | Item<br>code | How much did you pay in total? |      | Does your household own any [.....]<br><br>YES.....1<br><br>»» NEXT ITEM | How many (ITEMS) do you own? | What is the age of this (ITEM)?<br><b>If more than one item</b><br><b>Average age</b> | If you wanted to sell one of this [ITEM] today, how much would you receive?<br><b>If more than one item</b><br><b>average value</b> |
|                                                                                                       |                    |              | Number                         | KSHS |                                                                          | NUMBER                       | YEARS                                                                                 | KSHS                                                                                                                                |
| Major Household Appliances                                                                            |                    | 4900         |                                |      |                                                                          |                              |                                                                                       |                                                                                                                                     |
| Refrigerator                                                                                          |                    | 4901         |                                |      |                                                                          |                              |                                                                                       |                                                                                                                                     |
| Freezers                                                                                              |                    | 4902         |                                |      |                                                                          |                              |                                                                                       |                                                                                                                                     |
| Washing machine                                                                                       |                    | 4903         |                                |      |                                                                          |                              |                                                                                       |                                                                                                                                     |
| Electric/gas cooker                                                                                   |                    | 4904         |                                |      |                                                                          |                              |                                                                                       |                                                                                                                                     |
| jiko-charcoal                                                                                         |                    | 4905         |                                |      |                                                                          |                              |                                                                                       |                                                                                                                                     |
| Micro-wave oven                                                                                       |                    | 4906         |                                |      |                                                                          |                              |                                                                                       |                                                                                                                                     |
| Kerosene stove                                                                                        |                    | 4907         |                                |      |                                                                          |                              |                                                                                       |                                                                                                                                     |
| Air conditioner                                                                                       |                    | 4908         |                                |      |                                                                          |                              |                                                                                       |                                                                                                                                     |
| Electric heater                                                                                       |                    | 4909         |                                |      |                                                                          |                              |                                                                                       |                                                                                                                                     |
| Fans                                                                                                  |                    | 4910         |                                |      |                                                                          |                              |                                                                                       |                                                                                                                                     |
| Vacuum cleaner                                                                                        |                    | 4911         |                                |      |                                                                          |                              |                                                                                       |                                                                                                                                     |
| Electric Iron                                                                                         |                    | 4912         |                                |      |                                                                          |                              |                                                                                       |                                                                                                                                     |
| Iron - Charcoal                                                                                       |                    | 4913         |                                |      |                                                                          |                              |                                                                                       |                                                                                                                                     |
| Sewing machine                                                                                        |                    | 4914         |                                |      |                                                                          |                              |                                                                                       |                                                                                                                                     |
| Electric blender                                                                                      |                    | 4915         |                                |      |                                                                          |                              |                                                                                       |                                                                                                                                     |
| Electric toaster                                                                                      |                    | 4916         |                                |      |                                                                          |                              |                                                                                       |                                                                                                                                     |
| Electric kettle                                                                                       |                    | 4917         |                                |      |                                                                          |                              |                                                                                       |                                                                                                                                     |
| Coffee mills/makers                                                                                   |                    | 4918         |                                |      |                                                                          |                              |                                                                                       |                                                                                                                                     |
| Food mixers, deep fryers                                                                              |                    | 4919         |                                |      |                                                                          |                              |                                                                                       |                                                                                                                                     |
| Paraffin lamps                                                                                        |                    | 4920         |                                |      |                                                                          |                              |                                                                                       |                                                                                                                                     |
|                                                                                                       |                    |              |                                |      |                                                                          |                              |                                                                                       |                                                                                                                                     |

PROMPT FOR EACH ITEM ON THE LIST.

| Over the past one year (twelve months), did any member of the household purchase or pay for any [...] | M01                          | M02       | M03                            |      | M04                                                                       | M05                          | M06                                                                     | M07                                                                                                                   |
|-------------------------------------------------------------------------------------------------------|------------------------------|-----------|--------------------------------|------|---------------------------------------------------------------------------|------------------------------|-------------------------------------------------------------------------|-----------------------------------------------------------------------------------------------------------------------|
|                                                                                                       | YES...1<br>NO....2<br>(»M04) |           | How much did you pay in total? |      | Does your household own any [...]<br>YES.....1<br>NO.....2<br>» NEXT ITEM | How many (ITEMS) do you own? | What is the age of this (ITEM)?<br>If more than one item<br>Average age | If you wanted to sell one of this [ITEM] today, how much would you receive?<br>If more than one item<br>average value |
|                                                                                                       |                              | Item code | Number                         | KSHS |                                                                           | NUMBER                       | YEARS                                                                   | KSHS                                                                                                                  |
| Glassware, Tableware and Utensils                                                                     |                              | 5000      |                                |      |                                                                           |                              |                                                                         |                                                                                                                       |
| Glasses                                                                                               |                              | 5001      |                                |      |                                                                           |                              |                                                                         |                                                                                                                       |
| Cups and saucer                                                                                       |                              | 5002      |                                |      |                                                                           |                              |                                                                         |                                                                                                                       |
| bowls                                                                                                 |                              | 5003      |                                |      |                                                                           |                              |                                                                         |                                                                                                                       |
| plates                                                                                                |                              | 5004      |                                |      |                                                                           |                              |                                                                         |                                                                                                                       |
| spoons                                                                                                |                              | 5005      |                                |      |                                                                           |                              |                                                                         |                                                                                                                       |
| knives                                                                                                |                              | 5006      |                                |      |                                                                           |                              |                                                                         |                                                                                                                       |
| forks                                                                                                 |                              | 5007      |                                |      |                                                                           |                              |                                                                         |                                                                                                                       |
| cooking sufurias                                                                                      |                              | 5008      |                                |      |                                                                           |                              |                                                                         |                                                                                                                       |
| Mwiko                                                                                                 |                              | 5009      |                                |      |                                                                           |                              |                                                                         |                                                                                                                       |
| frying pans                                                                                           |                              | 5010      |                                |      |                                                                           |                              |                                                                         |                                                                                                                       |
| Pressure cooker                                                                                       |                              | 5011      |                                |      |                                                                           |                              |                                                                         |                                                                                                                       |
| Buckets/basins                                                                                        |                              | 5012      |                                |      |                                                                           |                              |                                                                         |                                                                                                                       |
| Household Furnishings                                                                                 |                              | 5100      |                                |      |                                                                           |                              |                                                                         |                                                                                                                       |
| Carpets                                                                                               |                              | 5101      |                                |      |                                                                           |                              |                                                                         |                                                                                                                       |
| Door mats                                                                                             |                              | 5102      |                                |      |                                                                           |                              |                                                                         |                                                                                                                       |
| Linoleum/Synthetic carpet                                                                             |                              | 5103      |                                |      |                                                                           |                              |                                                                         |                                                                                                                       |
| Curtains and accessories                                                                              |                              | 5104      |                                |      |                                                                           |                              |                                                                         |                                                                                                                       |
| Bed covers                                                                                            |                              | 5105      |                                |      |                                                                           |                              |                                                                         |                                                                                                                       |
| Bed sheets                                                                                            |                              | 5106      |                                |      |                                                                           |                              |                                                                         |                                                                                                                       |
| Blankets                                                                                              |                              | 5107      |                                |      |                                                                           |                              |                                                                         |                                                                                                                       |
| Pillows                                                                                               |                              | 5108      |                                |      |                                                                           |                              |                                                                         |                                                                                                                       |

| Over the past one year (twelve months), did any member of the household purchase or pay for any [...] | M01               | M02       | M03                            |      | M04                                                           | M05                          | M06                                                                     | M07                                                                                                                   |
|-------------------------------------------------------------------------------------------------------|-------------------|-----------|--------------------------------|------|---------------------------------------------------------------|------------------------------|-------------------------------------------------------------------------|-----------------------------------------------------------------------------------------------------------------------|
|                                                                                                       | NO....2<br>(»M04) |           | How much did you pay in total? |      | Does your household own any [...]<br>YES.....1<br>» NEXT ITEM | How many (ITEMS) do you own? | What is the age of this (ITEM)?<br>If more than one item<br>Average age | If you wanted to sell one of this [ITEM] today, how much would you receive?<br>If more than one item<br>average value |
|                                                                                                       |                   | Item code | Number                         | KSHS |                                                               | NUMBER                       | YEARS                                                                   | KSHS                                                                                                                  |
| Household Furnishings                                                                                 |                   | 5100      |                                |      |                                                               |                              |                                                                         |                                                                                                                       |
| Mattress                                                                                              |                   | 5109      |                                |      |                                                               |                              |                                                                         |                                                                                                                       |
| Towels                                                                                                |                   | 5110      |                                |      |                                                               |                              |                                                                         |                                                                                                                       |
| Table cloth/mats                                                                                      |                   | 5111      |                                |      |                                                               |                              |                                                                         |                                                                                                                       |
| Mosquito net                                                                                          |                   | 5112      |                                |      |                                                               |                              |                                                                         |                                                                                                                       |
| Pillow cases                                                                                          |                   | 5113      |                                |      |                                                               |                              |                                                                         |                                                                                                                       |
| Transport and Communication                                                                           |                   | 5200      |                                |      |                                                               |                              |                                                                         |                                                                                                                       |
| Spark plugs/points                                                                                    |                   | 5201      |                                |      |                                                               |                              |                                                                         |                                                                                                                       |
| Clutch plate                                                                                          |                   | 5202      |                                |      |                                                               |                              |                                                                         |                                                                                                                       |
| Brake lining                                                                                          |                   | 5203      |                                |      |                                                               |                              |                                                                         |                                                                                                                       |
| Brake pads                                                                                            |                   | 5204      |                                |      |                                                               |                              |                                                                         |                                                                                                                       |
| Fuel filter                                                                                           |                   | 5205      |                                |      |                                                               |                              |                                                                         |                                                                                                                       |
| Oil filter                                                                                            |                   | 5206      |                                |      |                                                               |                              |                                                                         |                                                                                                                       |
| Other car parts specify                                                                               |                   | 5207      |                                |      |                                                               |                              |                                                                         |                                                                                                                       |
| Car Alarm                                                                                             |                   | 5208      |                                |      |                                                               |                              |                                                                         |                                                                                                                       |
| Car Insurance                                                                                         |                   | 5209      |                                |      |                                                               |                              |                                                                         |                                                                                                                       |
| Driving lessons                                                                                       |                   | 5210      |                                |      |                                                               |                              |                                                                         |                                                                                                                       |
| International flights                                                                                 |                   | 5211      |                                |      |                                                               |                              |                                                                         |                                                                                                                       |
| Telephone installation                                                                                |                   | 5212      |                                |      |                                                               |                              |                                                                         |                                                                                                                       |
| Cellular handset                                                                                      |                   | 5213      |                                |      |                                                               |                              |                                                                         |                                                                                                                       |
| Post office private rental box                                                                        |                   | 5214      |                                |      |                                                               |                              |                                                                         |                                                                                                                       |
| Car                                                                                                   |                   | 5215      |                                |      |                                                               |                              |                                                                         |                                                                                                                       |

PROMPT FOR EACH ITEM ON THE LIST.

| Over the past one year (twelve months), did any member of the household purchase or pay for any [...] | M01                | M02       | M03                            |      | M04                                                            | M05                          | M06                                                                         | M07                                                                                                                       |
|-------------------------------------------------------------------------------------------------------|--------------------|-----------|--------------------------------|------|----------------------------------------------------------------|------------------------------|-----------------------------------------------------------------------------|---------------------------------------------------------------------------------------------------------------------------|
|                                                                                                       | YES...1<br>NO....2 |           | How much did you pay in total? |      | Does your household own any [...]<br><br>YES.....1<br>NO.....2 | How many (ITEMS) do you own? | What is the age of this (ITEM)?<br><b>If more than one item Average age</b> | If you wanted to sell one of this [ITEM] today, how much would you receive?<br><b>If more than one item average value</b> |
|                                                                                                       | (»M04)             | Item code | Number                         | KSHS | >> NEXT ITEM                                                   | NUMBER                       | YEARS                                                                       | KSHS                                                                                                                      |
| Transport and Communication                                                                           |                    | 5200      |                                |      |                                                                |                              |                                                                             |                                                                                                                           |
| Pick up                                                                                               |                    | 5216      |                                |      |                                                                |                              |                                                                             |                                                                                                                           |
| Motorcycle                                                                                            |                    | 5217      |                                |      |                                                                |                              |                                                                             |                                                                                                                           |
| Bicycle                                                                                               |                    | 5218      |                                |      |                                                                |                              |                                                                             |                                                                                                                           |
| Animal cart                                                                                           |                    | 5219      |                                |      |                                                                |                              |                                                                             |                                                                                                                           |
| Boat/canoe                                                                                            |                    | 5220      |                                |      |                                                                |                              |                                                                             |                                                                                                                           |
| Outboard engine                                                                                       |                    | 5221      |                                |      |                                                                |                              |                                                                             |                                                                                                                           |
| Computer                                                                                              |                    | 5222      |                                |      |                                                                |                              |                                                                             |                                                                                                                           |
| Satellite/decoder (cable TV) s                                                                        |                    | 5223      |                                |      |                                                                |                              |                                                                             |                                                                                                                           |
| Radio                                                                                                 |                    | 5224      |                                |      |                                                                |                              |                                                                             |                                                                                                                           |
| Television and antennae                                                                               |                    | 5225      |                                |      |                                                                |                              |                                                                             |                                                                                                                           |
| Recreation and Culture                                                                                |                    | 5300      |                                |      |                                                                |                              |                                                                             |                                                                                                                           |
| Cassette/CD/DVD -Blank                                                                                |                    | 5301      |                                |      |                                                                |                              |                                                                             |                                                                                                                           |
| Records musical                                                                                       |                    | 5302      |                                |      |                                                                |                              |                                                                             |                                                                                                                           |
| Photography Service (Portraits, weddings,etc                                                          |                    | 5303      |                                |      |                                                                |                              |                                                                             |                                                                                                                           |
| V video- recorders/cameras                                                                            |                    | 5304      |                                |      |                                                                |                              |                                                                             |                                                                                                                           |
| Radio/Cassette/CD Player                                                                              |                    | 5305      |                                |      |                                                                |                              |                                                                             |                                                                                                                           |
| Hi -Fi Stereo                                                                                         |                    | 5306      |                                |      |                                                                |                              |                                                                             |                                                                                                                           |
| Pre-Recorded cassettes                                                                                |                    | 5307      |                                |      |                                                                |                              |                                                                             |                                                                                                                           |
| Other musical instruments e.g. guitar                                                                 |                    | 5308      |                                |      |                                                                |                              |                                                                             |                                                                                                                           |
| Pianos/organs                                                                                         |                    | 5309      |                                |      |                                                                |                              |                                                                             |                                                                                                                           |
| Calculators                                                                                           |                    | 5310      |                                |      |                                                                |                              |                                                                             |                                                                                                                           |
| Toys and games                                                                                        |                    | 5311      |                                |      |                                                                |                              |                                                                             |                                                                                                                           |
| Hotel Accommodation                                                                                   |                    | 5312      |                                |      |                                                                |                              |                                                                             |                                                                                                                           |
| Tour Packages                                                                                         |                    | 5313      |                                |      |                                                                |                              |                                                                             |                                                                                                                           |

| Over the past one year (twelve months), did any member of the household purchase or pay for any [...] | M01     | M02       | M03                            |      | M04                                                | M05                          | M06                                                                         | M07                                                                                                                       |
|-------------------------------------------------------------------------------------------------------|---------|-----------|--------------------------------|------|----------------------------------------------------|------------------------------|-----------------------------------------------------------------------------|---------------------------------------------------------------------------------------------------------------------------|
|                                                                                                       | NO....2 |           | How much did you pay in total? |      | Does your household own any [...]<br><br>YES.....1 | How many (ITEMS) do you own? | What is the age of this (ITEM)?<br><b>If more than one item Average age</b> | If you wanted to sell one of this [ITEM] today, how much would you receive?<br><b>If more than one item average value</b> |
|                                                                                                       | (»M04)  | Item code | Number                         | KSHS | >> NEXT ITEM                                       | NUMBER                       | YEARS                                                                       | KSHS                                                                                                                      |
| Recreation and Culture                                                                                |         | 5300      |                                |      |                                                    |                              |                                                                             |                                                                                                                           |
| Club membership fees                                                                                  |         | 5314      |                                |      |                                                    |                              |                                                                             |                                                                                                                           |
| Sports/games charges                                                                                  |         | 5315      |                                |      |                                                    |                              |                                                                             |                                                                                                                           |
| Other recreation/entertainment (specify)                                                              |         | 5316      |                                |      |                                                    |                              |                                                                             |                                                                                                                           |
| Other Non-consumption Expenditure                                                                     |         | 5400      |                                |      |                                                    |                              |                                                                             |                                                                                                                           |
| Fees for Legal Services                                                                               |         | 5401      |                                |      |                                                    |                              |                                                                             |                                                                                                                           |
| Memberships of Professional Associations                                                              |         | 5402      |                                |      |                                                    |                              |                                                                             |                                                                                                                           |
| Birth/Marriage/Death Certificates                                                                     |         | 5403      |                                |      |                                                    |                              |                                                                             |                                                                                                                           |
| Coffin, Funeral Urns, and Tombstones                                                                  |         | 5404      |                                |      |                                                    |                              |                                                                             |                                                                                                                           |
| Road Licenses                                                                                         |         | 5405      |                                |      |                                                    |                              |                                                                             |                                                                                                                           |
| Newspaper Notices/Advertisements                                                                      |         | 5406      |                                |      |                                                    |                              |                                                                             |                                                                                                                           |
| Service of Marriage Counselors                                                                        |         | 5407      |                                |      |                                                    |                              |                                                                             |                                                                                                                           |
| Fines                                                                                                 |         | 5408      |                                |      |                                                    |                              |                                                                             |                                                                                                                           |
| Money Lost or Stolen (unrecovered)                                                                    |         | 5409      |                                |      |                                                    |                              |                                                                             |                                                                                                                           |
| Life insurance                                                                                        |         | 5410      |                                |      |                                                    |                              |                                                                             |                                                                                                                           |
| House insurance                                                                                       |         | 5411      |                                |      |                                                    |                              |                                                                             |                                                                                                                           |
| Education insurance                                                                                   |         | 5412      |                                |      |                                                    |                              |                                                                             |                                                                                                                           |
| Other insurance                                                                                       |         | 5413      |                                |      |                                                    |                              |                                                                             |                                                                                                                           |
| Non Agricultural land                                                                                 |         | 5414      |                                |      |                                                    |                              |                                                                             |                                                                                                                           |
| Borehole construction/repair                                                                          |         | 5415      |                                |      |                                                    |                              |                                                                             |                                                                                                                           |
| Water purification systems                                                                            |         | 5416      |                                |      |                                                    |                              |                                                                             |                                                                                                                           |
| Fixed line telephone costs                                                                            |         | 5417      |                                |      |                                                    |                              |                                                                             |                                                                                                                           |
| Sewage collection                                                                                     |         | 5418      |                                |      |                                                    |                              |                                                                             |                                                                                                                           |
| Toilet emptying services                                                                              |         | 5419      |                                |      |                                                    |                              |                                                                             |                                                                                                                           |
|                                                                                                       |         |           |                                |      |                                                    |                              |                                                                             |                                                                                                                           |

SECTION N: AGRICULTURE HOLDING

[ASK OF ALL THOSE CONCERNED WITH FARMING IN THE HOUSEHOLD]. THE TIME REFERENCE IS THE LAST 12 MONTHS.  
LIST IN N03 ALL PARCELS BEFORE COLLECTING DETAILS ON EACH.

|                                                                                                                     |                                          |                                                                                                                                                                |                                                                                                                                                                                         |                                                                                                     |                                                                                                                                         |                                                                                                                                   |                                                                                                                         |     |     |     |     |                                                                |                                                                 |                                                                                                                                                            |                                                                                     |                                                                                       |                                                                                                                                                                       |                          |  |       |  |      |  |              |  |
|---------------------------------------------------------------------------------------------------------------------|------------------------------------------|----------------------------------------------------------------------------------------------------------------------------------------------------------------|-----------------------------------------------------------------------------------------------------------------------------------------------------------------------------------------|-----------------------------------------------------------------------------------------------------|-----------------------------------------------------------------------------------------------------------------------------------------|-----------------------------------------------------------------------------------------------------------------------------------|-------------------------------------------------------------------------------------------------------------------------|-----|-----|-----|-----|----------------------------------------------------------------|-----------------------------------------------------------------|------------------------------------------------------------------------------------------------------------------------------------------------------------|-------------------------------------------------------------------------------------|---------------------------------------------------------------------------------------|-----------------------------------------------------------------------------------------------------------------------------------------------------------------------|--------------------------|--|-------|--|------|--|--------------|--|
| N01: Did any member of the household engage in farming in the last 12 months, whether self-employed or as a tenant? |                                          |                                                                                                                                                                |                                                                                                                                                                                         |                                                                                                     |                                                                                                                                         |                                                                                                                                   |                                                                                                                         |     |     |     |     |                                                                |                                                                 |                                                                                                                                                            |                                                                                     |                                                                                       |                                                                                                                                                                       | <input type="checkbox"/> |  | YES 1 |  | NO 2 |  | (»SECTION P) |  |
| N02                                                                                                                 | P<br>A<br>R<br>C<br>E<br>L<br><br>I<br>D | N03<br>Please tell me about each parcel of land that a HH member farmed during the last 12 months within this district.<br><br>WRITE A NAME TO IDENTIFY PARCEL | N04<br>Who in the household makes the decisions on input use and cropping activities on this parcel?<br>IF PRESENT, ASK FOLLOWING QUESTIONS TO THIS PERSON.<br>ID CODE NON MEMBER....98 | N05<br>What is the size of the parcel?<br>LAND AREA IN ACRES (one decimal place)<br><br>DK 98 ACRES | N06<br>What is the general texture of the soil on this parcel:<br><br>LOAMY 1<br>SANDY 2<br>BETWEEN SANDY & CLAY 3<br>CLAY 4<br>OTHER 5 | N07<br>What is the slope of this parcel:<br><br>1 FLAT 1<br>2 SLIGHT SLOPE 2<br>MODERATE SLOPE 3<br>3 STEEP/ HILLY 4<br>4 OTHER 5 | N08<br>What crops were grown on this parcel in the last 12 months?<br>LIST MOST IMPORTANT FIRST.<br>SEE CODES IN MANUAL |     |     |     |     | N09<br>Does HH own this parcel?<br><br>YES 1<br>NO 2<br>(»N11) | N10<br>Does HH have a title?<br><br>YES 1 (»N12)<br>NO 2 (»N12) | N11<br>How does HH operate this parcel (status of operations)?<br><br>RENTED/ LEASED 1<br>FREE -FAMILY 2<br>FREE-OTHERS 3<br>COMMUNAL 4<br>OTHER (SPEC.) 5 | N12<br>Do people buy and sell farmland in this area?<br><br>YES 1<br>NO 2<br>(»N14) | N13<br>If HH were to sell/buy this parcel today, how much could it fetch?<br><br>KSHS | N14<br>How much did you pay in total for your rented/leased parcel in last 12 months?<br><br>ESTIMATE VALUE OF ANY IN-KIND PAYMENTS.<br><br>answer if N11 = 1<br>KSHS |                          |  |       |  |      |  |              |  |
|                                                                                                                     |                                          |                                                                                                                                                                |                                                                                                                                                                                         |                                                                                                     |                                                                                                                                         |                                                                                                                                   | 1st                                                                                                                     | 2nd | 3rd | 4th | 5th |                                                                |                                                                 |                                                                                                                                                            |                                                                                     |                                                                                       |                                                                                                                                                                       |                          |  |       |  |      |  |              |  |
|                                                                                                                     |                                          |                                                                                                                                                                |                                                                                                                                                                                         |                                                                                                     |                                                                                                                                         |                                                                                                                                   |                                                                                                                         |     |     |     |     |                                                                |                                                                 |                                                                                                                                                            |                                                                                     |                                                                                       |                                                                                                                                                                       |                          |  |       |  |      |  |              |  |
| 2                                                                                                                   |                                          |                                                                                                                                                                |                                                                                                                                                                                         |                                                                                                     |                                                                                                                                         |                                                                                                                                   |                                                                                                                         |     |     |     |     |                                                                |                                                                 |                                                                                                                                                            |                                                                                     |                                                                                       |                                                                                                                                                                       |                          |  |       |  |      |  |              |  |
| 3                                                                                                                   |                                          |                                                                                                                                                                |                                                                                                                                                                                         |                                                                                                     |                                                                                                                                         |                                                                                                                                   |                                                                                                                         |     |     |     |     |                                                                |                                                                 |                                                                                                                                                            |                                                                                     |                                                                                       |                                                                                                                                                                       |                          |  |       |  |      |  |              |  |
| 4                                                                                                                   |                                          |                                                                                                                                                                |                                                                                                                                                                                         |                                                                                                     |                                                                                                                                         |                                                                                                                                   |                                                                                                                         |     |     |     |     |                                                                |                                                                 |                                                                                                                                                            |                                                                                     |                                                                                       |                                                                                                                                                                       |                          |  |       |  |      |  |              |  |
| 5                                                                                                                   |                                          |                                                                                                                                                                |                                                                                                                                                                                         |                                                                                                     |                                                                                                                                         |                                                                                                                                   |                                                                                                                         |     |     |     |     |                                                                |                                                                 |                                                                                                                                                            |                                                                                     |                                                                                       |                                                                                                                                                                       |                          |  |       |  |      |  |              |  |
| 6                                                                                                                   |                                          |                                                                                                                                                                |                                                                                                                                                                                         |                                                                                                     |                                                                                                                                         |                                                                                                                                   |                                                                                                                         |     |     |     |     |                                                                |                                                                 |                                                                                                                                                            |                                                                                     |                                                                                       |                                                                                                                                                                       |                          |  |       |  |      |  |              |  |
| 7                                                                                                                   |                                          |                                                                                                                                                                |                                                                                                                                                                                         |                                                                                                     |                                                                                                                                         |                                                                                                                                   |                                                                                                                         |     |     |     |     |                                                                |                                                                 |                                                                                                                                                            |                                                                                     |                                                                                       |                                                                                                                                                                       |                          |  |       |  |      |  |              |  |
| 8                                                                                                                   |                                          |                                                                                                                                                                |                                                                                                                                                                                         |                                                                                                     |                                                                                                                                         |                                                                                                                                   |                                                                                                                         |     |     |     |     |                                                                |                                                                 |                                                                                                                                                            |                                                                                     |                                                                                       |                                                                                                                                                                       |                          |  |       |  |      |  |              |  |
| 9                                                                                                                   |                                          |                                                                                                                                                                |                                                                                                                                                                                         |                                                                                                     |                                                                                                                                         |                                                                                                                                   |                                                                                                                         |     |     |     |     |                                                                |                                                                 |                                                                                                                                                            |                                                                                     |                                                                                       |                                                                                                                                                                       |                          |  |       |  |      |  |              |  |
| 10                                                                                                                  |                                          |                                                                                                                                                                |                                                                                                                                                                                         |                                                                                                     |                                                                                                                                         |                                                                                                                                   |                                                                                                                         |     |     |     |     |                                                                |                                                                 |                                                                                                                                                            |                                                                                     |                                                                                       |                                                                                                                                                                       |                          |  |       |  |      |  |              |  |
| 11                                                                                                                  |                                          |                                                                                                                                                                |                                                                                                                                                                                         |                                                                                                     |                                                                                                                                         |                                                                                                                                   |                                                                                                                         |     |     |     |     |                                                                |                                                                 |                                                                                                                                                            |                                                                                     |                                                                                       |                                                                                                                                                                       |                          |  |       |  |      |  |              |  |
| 12                                                                                                                  |                                          |                                                                                                                                                                |                                                                                                                                                                                         |                                                                                                     |                                                                                                                                         |                                                                                                                                   |                                                                                                                         |     |     |     |     |                                                                |                                                                 |                                                                                                                                                            |                                                                                     |                                                                                       |                                                                                                                                                                       |                          |  |       |  |      |  |              |  |

|                                          |                                                                                          |                                                      |                                                          |                                                           |                                                                                 |                                                                             |                                                                             |                                                                                             |                                         |                                                                           |                                                                                           |
|------------------------------------------|------------------------------------------------------------------------------------------|------------------------------------------------------|----------------------------------------------------------|-----------------------------------------------------------|---------------------------------------------------------------------------------|-----------------------------------------------------------------------------|-----------------------------------------------------------------------------|---------------------------------------------------------------------------------------------|-----------------------------------------|---------------------------------------------------------------------------|-------------------------------------------------------------------------------------------|
| N02                                      | N15                                                                                      | N16                                                  | N17                                                      | N18                                                       | N19                                                                             | N20                                                                         | N21                                                                         | N22                                                                                         | N23                                     | N24                                                                       | N25                                                                                       |
| P<br>A<br>R<br>C<br>E<br>L<br><br>I<br>D | How many months in the last 12 months did HH practice irrigation on this parcel of land? | What type of irrigation is practised on this parcel? | How does HH get the water for irrigation on this parcel? | How much did HH spend on irrigation water on this parcel? | In how many months does HH have sufficient water for irrigation of this parcel? | Did HH apply any inorganic fertilizer to this parcel in the last 12 months? | How much inorganic fertilizer (Kgs) did the HH apply in the last 12 months? | How much did HH pay for the inorganic fertilizer used on this parcel in the last 12 months? | Where did HH acquire the fertilizer?    | Did HH apply any organic fertilizer to this parcel in the last 12 months? | How much did HH pay for the organic fertilizer used on this parcel in the last 12 months? |
|                                          |                                                                                          |                                                      |                                                          |                                                           |                                                                                 |                                                                             |                                                                             |                                                                                             | LIST UP TO 2.                           |                                                                           |                                                                                           |
|                                          |                                                                                          |                                                      |                                                          |                                                           |                                                                                 |                                                                             |                                                                             |                                                                                             | MERCHANT 01                             | ANIMAL                                                                    |                                                                                           |
|                                          |                                                                                          |                                                      |                                                          |                                                           |                                                                                 |                                                                             |                                                                             |                                                                                             | RELATIVE 02                             | MANURE,                                                                   |                                                                                           |
|                                          |                                                                                          |                                                      |                                                          |                                                           |                                                                                 |                                                                             |                                                                             |                                                                                             | NEIGHBOR/FRIENC 03                      | COMPOST,                                                                  |                                                                                           |
|                                          |                                                                                          |                                                      |                                                          |                                                           |                                                                                 |                                                                             |                                                                             |                                                                                             | LOCAL MARKET 04                         | GREEN MANURE                                                              |                                                                                           |
|                                          |                                                                                          |                                                      |                                                          |                                                           |                                                                                 |                                                                             |                                                                             |                                                                                             | COOP/ASSOC 05                           |                                                                           |                                                                                           |
|                                          |                                                                                          |                                                      |                                                          |                                                           |                                                                                 |                                                                             |                                                                             |                                                                                             | COMPANY 06                              |                                                                           |                                                                                           |
|                                          |                                                                                          |                                                      |                                                          |                                                           |                                                                                 |                                                                             |                                                                             |                                                                                             | NGO/CBO 07                              |                                                                           |                                                                                           |
|                                          |                                                                                          |                                                      |                                                          |                                                           |                                                                                 |                                                                             |                                                                             |                                                                                             | GOK /GOK AGENCI 08                      |                                                                           |                                                                                           |
|                                          |                                                                                          |                                                      |                                                          |                                                           |                                                                                 |                                                                             |                                                                             | OTHER (SPECIFY) 09                                                                          |                                         |                                                                           |                                                                                           |
|                                          | IF 0 MONTHS                                                                              |                                                      |                                                          |                                                           |                                                                                 | YES 1                                                                       |                                                                             |                                                                                             | ESTIMATE VALUE OF ANY IN-KIND PAYMENTS. | YES 1                                                                     | ESTIMATE VALUE OF ANY IN-KIND PAYMENTS.                                                   |
|                                          | (»N20)                                                                                   |                                                      |                                                          |                                                           |                                                                                 | NO 2                                                                        |                                                                             |                                                                                             |                                         | NO 2                                                                      |                                                                                           |
|                                          |                                                                                          |                                                      |                                                          |                                                           |                                                                                 | (»N24)                                                                      |                                                                             |                                                                                             |                                         | (»N26)                                                                    |                                                                                           |
|                                          |                                                                                          |                                                      |                                                          | KSHS                                                      | MONTHS                                                                          |                                                                             | KGS                                                                         | KSHS                                                                                        | 1st 2nd                                 |                                                                           | KSHS                                                                                      |
|                                          |                                                                                          |                                                      |                                                          |                                                           |                                                                                 |                                                                             |                                                                             |                                                                                             |                                         |                                                                           |                                                                                           |
|                                          |                                                                                          |                                                      |                                                          |                                                           |                                                                                 |                                                                             |                                                                             |                                                                                             |                                         |                                                                           |                                                                                           |
| 2                                        |                                                                                          |                                                      |                                                          |                                                           |                                                                                 |                                                                             |                                                                             |                                                                                             |                                         |                                                                           |                                                                                           |
| 3                                        |                                                                                          |                                                      |                                                          |                                                           |                                                                                 |                                                                             |                                                                             |                                                                                             |                                         |                                                                           |                                                                                           |
| 4                                        |                                                                                          |                                                      |                                                          |                                                           |                                                                                 |                                                                             |                                                                             |                                                                                             |                                         |                                                                           |                                                                                           |
| 5                                        |                                                                                          |                                                      |                                                          |                                                           |                                                                                 |                                                                             |                                                                             |                                                                                             |                                         |                                                                           |                                                                                           |
| 6                                        |                                                                                          |                                                      |                                                          |                                                           |                                                                                 |                                                                             |                                                                             |                                                                                             |                                         |                                                                           |                                                                                           |
| 7                                        |                                                                                          |                                                      |                                                          |                                                           |                                                                                 |                                                                             |                                                                             |                                                                                             |                                         |                                                                           |                                                                                           |
| 8                                        |                                                                                          |                                                      |                                                          |                                                           |                                                                                 |                                                                             |                                                                             |                                                                                             |                                         |                                                                           |                                                                                           |
| 9                                        |                                                                                          |                                                      |                                                          |                                                           |                                                                                 |                                                                             |                                                                             |                                                                                             |                                         |                                                                           |                                                                                           |
| 10                                       |                                                                                          |                                                      |                                                          |                                                           |                                                                                 |                                                                             |                                                                             |                                                                                             |                                         |                                                                           |                                                                                           |
| 11                                       |                                                                                          |                                                      |                                                          |                                                           |                                                                                 |                                                                             |                                                                             |                                                                                             |                                         |                                                                           |                                                                                           |
| 12                                       |                                                                                          |                                                      |                                                          |                                                           |                                                                                 |                                                                             |                                                                             |                                                                                             |                                         |                                                                           |                                                                                           |

[illegible]

SECTION O: AGRICULTURE OUTPUT

[ASK OF ALL THOSE CONCERNED WITH FARMING IN THE HOUSEHOLD]. THE TIME REFERENCE IS THE LAST 12 MONTHS.  
LIST ALL CROPS BEFORE COLLECTING DETAILS ON EACH.

|     |                                                                                                                                                  |         |                                                                                                       |  |  |  |  |                                                     |                                |                                                                     |                                                                                                                                                                   |  |                                        |                                                                 |                                                                         |                                         |                                                                     |                                                        |                                                                                                                                                                          |                                                                                                                                                                          |                  |                                                                                                |                  |                                                                                                                    |                  |
|-----|--------------------------------------------------------------------------------------------------------------------------------------------------|---------|-------------------------------------------------------------------------------------------------------|--|--|--|--|-----------------------------------------------------|--------------------------------|---------------------------------------------------------------------|-------------------------------------------------------------------------------------------------------------------------------------------------------------------|--|----------------------------------------|-----------------------------------------------------------------|-------------------------------------------------------------------------|-----------------------------------------|---------------------------------------------------------------------|--------------------------------------------------------|--------------------------------------------------------------------------------------------------------------------------------------------------------------------------|--------------------------------------------------------------------------------------------------------------------------------------------------------------------------|------------------|------------------------------------------------------------------------------------------------|------------------|--------------------------------------------------------------------------------------------------------------------|------------------|
| O01 | O02                                                                                                                                              |         | O03                                                                                                   |  |  |  |  | O04                                                 |                                | O05                                                                 | O06                                                                                                                                                               |  | O07                                    | O08                                                             | O09                                                                     | O10                                     | O11                                                                 | O12                                                    |                                                                                                                                                                          | O13                                                                                                                                                                      |                  | O14                                                                                            |                  | O15                                                                                                                |                  |
|     | Please tell me all the crops that members of the household farmed in the past 12 months, including <b>cash crops, tree crops and food crops.</b> |         | On which parcels did HH farm [NAME CROP in O02] ?<br><br>RECORD PARCEL IDS LISTED IN <b>SECTION N</b> |  |  |  |  | Total crop area in <b>ACRES</b> (one decimal place) |                                | Did HH use any purchased seeds for this crop in the last 12 months? | Where did HH acquire the seeds?<br>LIST UP TO TWO.                                                                                                                |  | What quantity of seeds did HH obtain ? | How much did HH pay for the purchased seeds used for this crop? | Did HH use any purchased seedlings for this crop in the last 12 months? | What number of seedlings did HH obtain? | How much did HH pay for the purchased seedlings used for this crop? | Where did HH acquire the seedlings?<br>LIST UP TO TWO. |                                                                                                                                                                          | How much of the [...] did the HH harvest in the last 12 months from all these parcels in which [...] was planted?<br><br>IF NONE, ENTER ZERO<br><b>&gt;&gt;Next crop</b> |                  | How much of the [...] harvested in the last 12 months was consumed?<br><br>IF NONE, ENTER ZERO |                  | How much of the [...] harvested in the last 12 months was sold?<br><br>IF NONE, ENTER ZERO.<br><b>&gt;&gt; O19</b> |                  |
|     | CROP NAME                                                                                                                                        | CROP ID | PARCEL ID                                                                                             |  |  |  |  | ACRES                                               | YES 1<br>NO 2<br><b>(=O09)</b> |                                                                     | MERCHANT 01<br>RELATIVE 02<br>NEIGHBOR 03<br>LOCAL<br>MARKET 04<br>COOP/ASSOC. 05<br>PRIVATE<br>COMPANY 06<br>NGO/CBO 07<br>GOK AGENCIES 08<br>OTHER (SPECIFY) 09 |  |                                        | ESTIMATE VALUE OF ANY IN-KIND PAYMENTS.                         | YES 1<br>NO 2<br><b>(=O13)</b>                                          | number                                  |                                                                     | ESTIMATE VALUE OF ANY IN-KIND PAYMENTS.                | MERCHANT 01<br>RELATIVE 02<br>NEIGHBOR/FRIEND 03<br>LOCAL<br>MARKET 04<br>COOP/ASSOC. 05<br>PRIVATE<br>COMPANY 06<br>NGO/CBO 07<br>GOK AGENCIES 08<br>OTHER (SPECIFY) 09 | QUANTITY                                                                                                                                                                 | UNIT CODES BELOW | QUANTITY                                                                                       | UNIT CODES BELOW | QUANTITY                                                                                                           | UNIT CODES BELOW |
| 1   |                                                                                                                                                  |         |                                                                                                       |  |  |  |  |                                                     |                                |                                                                     |                                                                                                                                                                   |  |                                        |                                                                 |                                                                         |                                         |                                                                     |                                                        |                                                                                                                                                                          |                                                                                                                                                                          |                  |                                                                                                |                  |                                                                                                                    |                  |
| 2   |                                                                                                                                                  |         |                                                                                                       |  |  |  |  |                                                     |                                |                                                                     |                                                                                                                                                                   |  |                                        |                                                                 |                                                                         |                                         |                                                                     |                                                        |                                                                                                                                                                          |                                                                                                                                                                          |                  |                                                                                                |                  |                                                                                                                    |                  |
| 3   |                                                                                                                                                  |         |                                                                                                       |  |  |  |  |                                                     |                                |                                                                     |                                                                                                                                                                   |  |                                        |                                                                 |                                                                         |                                         |                                                                     |                                                        |                                                                                                                                                                          |                                                                                                                                                                          |                  |                                                                                                |                  |                                                                                                                    |                  |
| 4   |                                                                                                                                                  |         |                                                                                                       |  |  |  |  |                                                     |                                |                                                                     |                                                                                                                                                                   |  |                                        |                                                                 |                                                                         |                                         |                                                                     |                                                        |                                                                                                                                                                          |                                                                                                                                                                          |                  |                                                                                                |                  |                                                                                                                    |                  |
| 5   |                                                                                                                                                  |         |                                                                                                       |  |  |  |  |                                                     |                                |                                                                     |                                                                                                                                                                   |  |                                        |                                                                 |                                                                         |                                         |                                                                     |                                                        |                                                                                                                                                                          |                                                                                                                                                                          |                  |                                                                                                |                  |                                                                                                                    |                  |
| 6   |                                                                                                                                                  |         |                                                                                                       |  |  |  |  |                                                     |                                |                                                                     |                                                                                                                                                                   |  |                                        |                                                                 |                                                                         |                                         |                                                                     |                                                        |                                                                                                                                                                          |                                                                                                                                                                          |                  |                                                                                                |                  |                                                                                                                    |                  |
| 7   |                                                                                                                                                  |         |                                                                                                       |  |  |  |  |                                                     |                                |                                                                     |                                                                                                                                                                   |  |                                        |                                                                 |                                                                         |                                         |                                                                     |                                                        |                                                                                                                                                                          |                                                                                                                                                                          |                  |                                                                                                |                  |                                                                                                                    |                  |
| 8   |                                                                                                                                                  |         |                                                                                                       |  |  |  |  |                                                     |                                |                                                                     |                                                                                                                                                                   |  |                                        |                                                                 |                                                                         |                                         |                                                                     |                                                        |                                                                                                                                                                          |                                                                                                                                                                          |                  |                                                                                                |                  |                                                                                                                    |                  |
| 9   |                                                                                                                                                  |         |                                                                                                       |  |  |  |  |                                                     |                                |                                                                     |                                                                                                                                                                   |  |                                        |                                                                 |                                                                         |                                         |                                                                     |                                                        |                                                                                                                                                                          |                                                                                                                                                                          |                  |                                                                                                |                  |                                                                                                                    |                  |
| 10  |                                                                                                                                                  |         |                                                                                                       |  |  |  |  |                                                     |                                |                                                                     |                                                                                                                                                                   |  |                                        |                                                                 |                                                                         |                                         |                                                                     |                                                        |                                                                                                                                                                          |                                                                                                                                                                          |                  |                                                                                                |                  |                                                                                                                    |                  |
| 11  |                                                                                                                                                  |         |                                                                                                       |  |  |  |  |                                                     |                                |                                                                     |                                                                                                                                                                   |  |                                        |                                                                 |                                                                         |                                         |                                                                     |                                                        |                                                                                                                                                                          |                                                                                                                                                                          |                  |                                                                                                |                  |                                                                                                                    |                  |
| 12  |                                                                                                                                                  |         |                                                                                                       |  |  |  |  |                                                     |                                |                                                                     |                                                                                                                                                                   |  |                                        |                                                                 |                                                                         |                                         |                                                                     |                                                        |                                                                                                                                                                          |                                                                                                                                                                          |                  |                                                                                                |                  |                                                                                                                    |                  |

O13 - O21

|                   |                |
|-------------------|----------------|
| UNIT              |                |
| KILOGRAMME. . . 1 | Tonnes. . . 4  |
| 50 KG. BAG. . . 2 | Number . . . 5 |
| 90 KG. BAG. . . 3 |                |

O18

|                 |                     |                     |
|-----------------|---------------------|---------------------|
| MERCHANT. . . 1 | LOCAL MARKET. . . 4 | GOK AGENCIES. . . 7 |
| RELATIVE. . . 2 | COOP/ASSOC. . . 5   | AUCTION             |
| NEIGHBOR. . . 3 | PRIVATE             | FLOOR . . . . . 8   |
|                 | COMPANY . . . . . 6 | OTHER (SPECIFY).9   |



## SECTION P: LIVESTOCK

[ASK OF THOSE CONCERNED WITH ANIMAL HUSBANDRY IN THE HOUSEHOLD]. THE TIME REFERENCE IS THE LAST TWELVE MONTHS.

|                                                                                                                     |                                                                                                            |                                                      |                                                                                                                   |                                                                                                                                |                                                                                                                                    |                                                                                            |                                                                                  |                                                                                                              |                                                                                                     |                                                                                                                                  |  |
|---------------------------------------------------------------------------------------------------------------------|------------------------------------------------------------------------------------------------------------|------------------------------------------------------|-------------------------------------------------------------------------------------------------------------------|--------------------------------------------------------------------------------------------------------------------------------|------------------------------------------------------------------------------------------------------------------------------------|--------------------------------------------------------------------------------------------|----------------------------------------------------------------------------------|--------------------------------------------------------------------------------------------------------------|-----------------------------------------------------------------------------------------------------|----------------------------------------------------------------------------------------------------------------------------------|--|
| P01: Has any member of your household raised or owned livestock, poultry, fish, bees etc during the past 12 months? |                                                                                                            |                                                      |                                                                                                                   |                                                                                                                                |                                                                                                                                    |                                                                                            |                                                                                  |                                                                                                              |                                                                                                     | <div> <div></div> <div>Yes</div> <div>1</div> </div> <div> <div></div> <div>No</div> <div>2</div> </div> <div>(»SECTION Q)</div> |  |
| I<br>D<br><br>C<br>O<br>D<br>E                                                                                      | P02                                                                                                        | P03                                                  | P04                                                                                                               | P05                                                                                                                            | P06                                                                                                                                | P07                                                                                        | P08                                                                              | P09                                                                                                          | P10                                                                                                 |                                                                                                                                  |  |
|                                                                                                                     | Please give me the types of all animals that any member of the household raised in the last twelve months. | How many [...] does household <u>own</u> at present? | If household <u>sold one</u> of those [...] today, how much money could household get for it?<br><br>(AVG. PRICE) | How many [...] did household <u>sell</u> during the last twelve months?<br><br>IF NONE, ENTER ZERO<br><br>IF ZERO,<br><br>»P07 | How much did household receive for the sale of all these [...] during the last 12 months?<br><br>INCLUDE VALUE OF IN-KIND PAYMENTS | How many [...] did household consume during the last 12 months?<br><br>IF NONE, ENTER ZERO | How many [...] <u>died</u> during the last 12 months?<br><br>IF NONE, ENTER ZERO | How many of your [...] <u>were lost or were stolen</u> during the last 12 months?<br><br>IF NONE, ENTER ZERO | How many of your [...] <u>were given away</u> during the last 12 months?<br><br>IF NONE, ENTER ZERO |                                                                                                                                  |  |
|                                                                                                                     | See the manual for livestock codes                                                                         |                                                      |                                                                                                                   |                                                                                                                                |                                                                                                                                    |                                                                                            |                                                                                  |                                                                                                              |                                                                                                     |                                                                                                                                  |  |
|                                                                                                                     | ANIMAL                                                                                                     | ANIMAL CODE                                          | NO. OF ANIMALS                                                                                                    | KSHS                                                                                                                           | NO. OF ANIMALS                                                                                                                     | KSHS                                                                                       | NO. OF ANIMALS                                                                   | NO. OF ANIMALS                                                                                               | NO. OF ANIMALS                                                                                      |                                                                                                                                  |  |
| 1                                                                                                                   |                                                                                                            |                                                      |                                                                                                                   |                                                                                                                                |                                                                                                                                    |                                                                                            |                                                                                  |                                                                                                              |                                                                                                     |                                                                                                                                  |  |
| 2                                                                                                                   |                                                                                                            |                                                      |                                                                                                                   |                                                                                                                                |                                                                                                                                    |                                                                                            |                                                                                  |                                                                                                              |                                                                                                     |                                                                                                                                  |  |
| 3                                                                                                                   |                                                                                                            |                                                      |                                                                                                                   |                                                                                                                                |                                                                                                                                    |                                                                                            |                                                                                  |                                                                                                              |                                                                                                     |                                                                                                                                  |  |
| 4                                                                                                                   |                                                                                                            |                                                      |                                                                                                                   |                                                                                                                                |                                                                                                                                    |                                                                                            |                                                                                  |                                                                                                              |                                                                                                     |                                                                                                                                  |  |
| 5                                                                                                                   |                                                                                                            |                                                      |                                                                                                                   |                                                                                                                                |                                                                                                                                    |                                                                                            |                                                                                  |                                                                                                              |                                                                                                     |                                                                                                                                  |  |
| 6                                                                                                                   |                                                                                                            |                                                      |                                                                                                                   |                                                                                                                                |                                                                                                                                    |                                                                                            |                                                                                  |                                                                                                              |                                                                                                     |                                                                                                                                  |  |
| 7                                                                                                                   |                                                                                                            |                                                      |                                                                                                                   |                                                                                                                                |                                                                                                                                    |                                                                                            |                                                                                  |                                                                                                              |                                                                                                     |                                                                                                                                  |  |
| 8                                                                                                                   |                                                                                                            |                                                      |                                                                                                                   |                                                                                                                                |                                                                                                                                    |                                                                                            |                                                                                  |                                                                                                              |                                                                                                     |                                                                                                                                  |  |
| 9                                                                                                                   |                                                                                                            |                                                      |                                                                                                                   |                                                                                                                                |                                                                                                                                    |                                                                                            |                                                                                  |                                                                                                              |                                                                                                     |                                                                                                                                  |  |
| 10                                                                                                                  |                                                                                                            |                                                      |                                                                                                                   |                                                                                                                                |                                                                                                                                    |                                                                                            |                                                                                  |                                                                                                              |                                                                                                     |                                                                                                                                  |  |
| 11                                                                                                                  |                                                                                                            |                                                      |                                                                                                                   |                                                                                                                                |                                                                                                                                    |                                                                                            |                                                                                  |                                                                                                              |                                                                                                     |                                                                                                                                  |  |
| 12                                                                                                                  |                                                                                                            |                                                      |                                                                                                                   |                                                                                                                                |                                                                                                                                    |                                                                                            |                                                                                  |                                                                                                              |                                                                                                     |                                                                                                                                  |  |

| I<br>D<br>C<br>O<br>D<br>E | P11            | P12                                                                                               | P13                                                                                           | P14                                                                                                                                 | P15                                                                                                         | P16                                                                                                                               | P17                                                                                                                                                                                          | P18                                                                                                                                                     | P19                                                                               |          |       |                                           |                              |                  |                         |                     | ANIMAL<br>CODE |
|----------------------------|----------------|---------------------------------------------------------------------------------------------------|-----------------------------------------------------------------------------------------------|-------------------------------------------------------------------------------------------------------------------------------------|-------------------------------------------------------------------------------------------------------------|-----------------------------------------------------------------------------------------------------------------------------------|----------------------------------------------------------------------------------------------------------------------------------------------------------------------------------------------|---------------------------------------------------------------------------------------------------------------------------------------------------------|-----------------------------------------------------------------------------------|----------|-------|-------------------------------------------|------------------------------|------------------|-------------------------|---------------------|----------------|
|                            | ANIMAL<br>CODE | Did household purchase any (...) in the last 12 months<br><br><div>YES 1<br/>NO 2</div><br>(»P15) | How many [...] did household <u>purchase</u> during the last 12 months?<br><br>No. OF ANIMALS | How much did household pay in total for these [...] during the last 12 months?<br><br>INCLUDE VALUE OF IN-KIND PAYMENTS<br><br>KSHS | How many [...] were <u>born</u> during the last 12 months?<br><br>IF NONE, ENTER ZERO<br><br>No. OF ANIMALS | How many [...] were <u>received</u> by your household during the last 12 months?<br><br>IF NONE, ENTER ZERO<br><br>No. OF ANIMALS | For all your (...), how many days of labour did HH hire in the last 12 months? Include all tasks - (herding, feeding, milking etc) IF NONE, ENTER ZERO and »P19<br><br>PERSON-DAYS OF LABOUR | How much did HH pay for the total amount of labour used on this (...) in the last 12 months?<br><br>ESTIMATE VALUE OF ANY IN-KIND PAYMENTS.<br><br>KSHS | How much did the HH spend on the following livestock inputs in the last 12 month? |          |       |                                           |                              |                  |                         |                     |                |
|                            |                |                                                                                                   |                                                                                               |                                                                                                                                     |                                                                                                             |                                                                                                                                   |                                                                                                                                                                                              |                                                                                                                                                         | Drugs and medicines                                                               | Vaccines | Water | Livestock chemicals(dipping and spraying) | Livestock manufactured feeds | Livestock fodder | Artificial Insemination | Livestock Insurance |                |
|                            |                |                                                                                                   |                                                                                               |                                                                                                                                     |                                                                                                             |                                                                                                                                   |                                                                                                                                                                                              |                                                                                                                                                         | KSHS                                                                              | KSHS     | KSHS  | KSHS                                      | KSHS                         | KSHS             | KSHS                    | KSHS                |                |
| 1                          |                |                                                                                                   |                                                                                               |                                                                                                                                     |                                                                                                             |                                                                                                                                   |                                                                                                                                                                                              |                                                                                                                                                         |                                                                                   |          |       |                                           |                              |                  |                         |                     |                |
| 2                          |                |                                                                                                   |                                                                                               |                                                                                                                                     |                                                                                                             |                                                                                                                                   |                                                                                                                                                                                              |                                                                                                                                                         |                                                                                   |          |       |                                           |                              |                  |                         |                     |                |
| 3                          |                |                                                                                                   |                                                                                               |                                                                                                                                     |                                                                                                             |                                                                                                                                   |                                                                                                                                                                                              |                                                                                                                                                         |                                                                                   |          |       |                                           |                              |                  |                         |                     |                |
| 4                          |                |                                                                                                   |                                                                                               |                                                                                                                                     |                                                                                                             |                                                                                                                                   |                                                                                                                                                                                              |                                                                                                                                                         |                                                                                   |          |       |                                           |                              |                  |                         |                     |                |
| 5                          |                |                                                                                                   |                                                                                               |                                                                                                                                     |                                                                                                             |                                                                                                                                   |                                                                                                                                                                                              |                                                                                                                                                         |                                                                                   |          |       |                                           |                              |                  |                         |                     |                |
| 6                          |                |                                                                                                   |                                                                                               |                                                                                                                                     |                                                                                                             |                                                                                                                                   |                                                                                                                                                                                              |                                                                                                                                                         |                                                                                   |          |       |                                           |                              |                  |                         |                     |                |
| 7                          |                |                                                                                                   |                                                                                               |                                                                                                                                     |                                                                                                             |                                                                                                                                   |                                                                                                                                                                                              |                                                                                                                                                         |                                                                                   |          |       |                                           |                              |                  |                         |                     |                |
| 8                          |                |                                                                                                   |                                                                                               |                                                                                                                                     |                                                                                                             |                                                                                                                                   |                                                                                                                                                                                              |                                                                                                                                                         |                                                                                   |          |       |                                           |                              |                  |                         |                     |                |
| 9                          |                |                                                                                                   |                                                                                               |                                                                                                                                     |                                                                                                             |                                                                                                                                   |                                                                                                                                                                                              |                                                                                                                                                         |                                                                                   |          |       |                                           |                              |                  |                         |                     |                |
| 10                         |                |                                                                                                   |                                                                                               |                                                                                                                                     |                                                                                                             |                                                                                                                                   |                                                                                                                                                                                              |                                                                                                                                                         |                                                                                   |          |       |                                           |                              |                  |                         |                     |                |
| 11                         |                |                                                                                                   |                                                                                               |                                                                                                                                     |                                                                                                             |                                                                                                                                   |                                                                                                                                                                                              |                                                                                                                                                         |                                                                                   |          |       |                                           |                              |                  |                         |                     |                |
| 12                         |                |                                                                                                   |                                                                                               |                                                                                                                                     |                                                                                                             |                                                                                                                                   |                                                                                                                                                                                              |                                                                                                                                                         |                                                                                   |          |       |                                           |                              |                  |                         |                     |                |

| I<br>D<br><br>C<br>O<br>D<br>E | P19<br>How much did the HH spend on the following livestock inputs in the last 12 month? |            |             |                             |                                   |             |       |       | P20<br>Who is the main provider of Artificial Insemination?<br>FOR CATTLE ONLY | P21<br>Who is the main provider of veterinary (animal treatment) services? | P22<br>What was the household expenditure in KSHS on the following items in the last 12 months? |   |                                                          |                                                               |
|--------------------------------|------------------------------------------------------------------------------------------|------------|-------------|-----------------------------|-----------------------------------|-------------|-------|-------|--------------------------------------------------------------------------------|----------------------------------------------------------------------------|-------------------------------------------------------------------------------------------------|---|----------------------------------------------------------|---------------------------------------------------------------|
|                                | fuels                                                                                    | lubricants | electricity | machinery/equipment repairs | purchase of small farm implements | Farm repair | Other | Total | Government                                                                     | 1                                                                          | Government                                                                                      | 1 | Cattle sheds, paddocks and other livestock constructions | Purchase of mechanical equipments eg. Tractor,Ox Ploughs etc. |
|                                | KSHS                                                                                     | KSHS       | KSHS        | KSHS                        | KSHS                              | KSHS        | KSHS  | KSHS  | Private Vet                                                                    | 2                                                                          | Private Vet                                                                                     | 2 |                                                          |                                                               |
|                                |                                                                                          |            |             |                             |                                   |             |       | Self  | 3                                                                              | Self                                                                       | 3                                                                                               |   |                                                          |                                                               |
|                                |                                                                                          |            |             |                             |                                   |             |       |       | None                                                                           | 4                                                                          | None                                                                                            | 4 |                                                          |                                                               |
|                                |                                                                                          |            |             |                             |                                   |             |       |       | Others specify                                                                 | 5                                                                          | Others specify                                                                                  | 5 | Kshs                                                     | Kshs                                                          |
| 1                              |                                                                                          |            |             |                             |                                   |             |       |       |                                                                                |                                                                            |                                                                                                 |   |                                                          |                                                               |
| 2                              |                                                                                          |            |             |                             |                                   |             |       |       |                                                                                |                                                                            |                                                                                                 |   |                                                          |                                                               |
| 3                              |                                                                                          |            |             |                             |                                   |             |       |       |                                                                                |                                                                            |                                                                                                 |   |                                                          |                                                               |
| 4                              |                                                                                          |            |             |                             |                                   |             |       |       |                                                                                |                                                                            |                                                                                                 |   |                                                          |                                                               |
| 5                              |                                                                                          |            |             |                             |                                   |             |       |       |                                                                                |                                                                            |                                                                                                 |   |                                                          |                                                               |
| 6                              |                                                                                          |            |             |                             |                                   |             |       |       |                                                                                |                                                                            |                                                                                                 |   |                                                          |                                                               |
| 7                              |                                                                                          |            |             |                             |                                   |             |       |       |                                                                                |                                                                            |                                                                                                 |   |                                                          |                                                               |
| 8                              |                                                                                          |            |             |                             |                                   |             |       |       |                                                                                |                                                                            |                                                                                                 |   |                                                          |                                                               |
| 9                              |                                                                                          |            |             |                             |                                   |             |       |       |                                                                                |                                                                            |                                                                                                 |   |                                                          |                                                               |
| 10                             |                                                                                          |            |             |                             |                                   |             |       |       |                                                                                |                                                                            |                                                                                                 |   |                                                          |                                                               |
| 11                             |                                                                                          |            |             |                             |                                   |             |       |       |                                                                                |                                                                            |                                                                                                 |   |                                                          |                                                               |
| 12                             |                                                                                          |            |             |                             |                                   |             |       |       |                                                                                |                                                                            |                                                                                                 |   |                                                          |                                                               |

I  
D  
  
C  
O  
D  
E

P23

What quantity of (PRODUCE) did you get in the last one month?

SEEE CODES ON THE RIGHT SIDE

Quantityunit

P24

Of what was produced how much was sold?  
IF NONE, ENTER ZERO and  
>>P26  
Codes below

SEEE CODES ON THE RIGHT SIDE

QuantityValue(KSHS)

P25

To whom was the produce sold? See codes below

P26

What quantity of produce was given out?

QuantityUnit

|    |                  |  |  |  |  |  |  |  |                    |                    |
|----|------------------|--|--|--|--|--|--|--|--------------------|--------------------|
| 1  | Milk             |  |  |  |  |  |  |  | P23,P24,P26        |                    |
| 2  | Eggs             |  |  |  |  |  |  |  |                    | Kilogramme1        |
| 3  | Honey            |  |  |  |  |  |  |  |                    | Litre2             |
| 4  | Wool/fur         |  |  |  |  |  |  |  |                    | Number3            |
| 5  | Hides/skins      |  |  |  |  |  |  |  |                    | Trays4             |
| 6  | Beef             |  |  |  |  |  |  |  | 5-litre jerry can5 |                    |
| 7  | Pork             |  |  |  |  |  |  |  | P25                |                    |
| 8  | Mutton/Goat meat |  |  |  |  |  |  |  |                    | co-operative. ...1 |
| 9  | Fish             |  |  |  |  |  |  |  |                    | KCC .... 22        |
| 10 | Chicken meat     |  |  |  |  |  |  |  |                    | Factory/Trader..3  |
| 11 | Other            |  |  |  |  |  |  |  | KFA ..... 44       |                    |
| 12 |                  |  |  |  |  |  |  |  | Local Mkt5         |                    |
|    |                  |  |  |  |  |  |  |  | Roadside6          |                    |
|    |                  |  |  |  |  |  |  |  | On Farm7           |                    |
|    |                  |  |  |  |  |  |  |  | Company8           |                    |
|    |                  |  |  |  |  |  |  |  | Others9            |                    |

## **SECTION Q: HOUSEHOLD ENTERPRISES**

**[ASK OF HOUSEHOLD HEAD OR MOST KNOWLEDGEABLE RESPONDENT]**

Q01. Over the past month, has anyone in your household operated any **non-agricultural income-generating enterprise** which produces goods or services or has anyone in your household owned a shop or operated a trading business? ☐ YES . 1  
☐ NO . 2  
 (Enterprises include posho mill , jua kali business, water kiosks/vendor, solid waste collection, etc. (informal enterprises) **(»NEXT SECTION)**

|     |                                                                                                             |                                                                                                                |     |     |                                                                                               |                                                                                                        |                      |                         |                            |                |                                                      |                |                                                                                                     |            |                  |                                                                            |     |                                                                                   |                                                                                                             |
|-----|-------------------------------------------------------------------------------------------------------------|----------------------------------------------------------------------------------------------------------------|-----|-----|-----------------------------------------------------------------------------------------------|--------------------------------------------------------------------------------------------------------|----------------------|-------------------------|----------------------------|----------------|------------------------------------------------------|----------------|-----------------------------------------------------------------------------------------------------|------------|------------------|----------------------------------------------------------------------------|-----|-----------------------------------------------------------------------------------|-------------------------------------------------------------------------------------------------------------|
| Q02 | Q14                                                                                                         | Q15                                                                                                            |     |     | Q16                                                                                           | Q17                                                                                                    |                      |                         |                            |                |                                                      |                |                                                                                                     |            |                  | Q18                                                                        |     | Q19                                                                               | Q20                                                                                                         |
|     | When the income-generating activity is running, how many hours per week does each employee work on average? | What was the main source of <u>start-up capital</u> for this income-generating activity? CAN LIST UP TO THREE. |     |     | What were the <u>total sales</u> for the income-generating activity over the past six months? | What were the <u>business costs</u> last month in the following categories?<br><br>IF NONE, ENTER ZERO |                      |                         |                            |                |                                                      |                |                                                                                                     |            |                  | To whom do you sell your products or services?<br><br>LIST UP TO 2 BUYERS. |     | Over the past six months, did you earn a profit, make a loss, or just break even? | What was the <u>amount you earned or lost</u> from this income generating activity over the past six month? |
|     |                                                                                                             | LOAN FROM FAMILY/FRIENDS                                                                                       | 01  |     |                                                                                               |                                                                                                        |                      |                         |                            |                |                                                      |                |                                                                                                     |            |                  |                                                                            |     |                                                                                   |                                                                                                             |
|     |                                                                                                             | GIFT FROM FAMILY/FRIENDS                                                                                       | 02  |     |                                                                                               |                                                                                                        |                      |                         |                            |                |                                                      |                |                                                                                                     |            |                  |                                                                            |     |                                                                                   |                                                                                                             |
|     |                                                                                                             | SALE OF ASSETS OWNED                                                                                           | 03  |     |                                                                                               |                                                                                                        |                      |                         |                            |                |                                                      |                |                                                                                                     |            |                  |                                                                            |     |                                                                                   |                                                                                                             |
|     |                                                                                                             | PROCEEDS FROM ANOTHER BUSINESS                                                                                 | 04  |     |                                                                                               |                                                                                                        |                      |                         |                            |                |                                                      |                |                                                                                                     |            |                  |                                                                            |     |                                                                                   |                                                                                                             |
|     |                                                                                                             | OWN SAVINGS                                                                                                    | 05  |     |                                                                                               |                                                                                                        |                      |                         |                            |                |                                                      |                |                                                                                                     |            |                  |                                                                            |     |                                                                                   |                                                                                                             |
|     |                                                                                                             | LOAN FROM SACCOS                                                                                               | 06  |     |                                                                                               |                                                                                                        |                      |                         |                            |                |                                                      |                |                                                                                                     |            |                  |                                                                            |     |                                                                                   |                                                                                                             |
|     |                                                                                                             | NON-AGRICULTURAL CREDIT, BANK OR OTHER INSTITUTION                                                             | 07  |     |                                                                                               |                                                                                                        |                      |                         |                            |                |                                                      |                |                                                                                                     |            |                  |                                                                            |     |                                                                                   |                                                                                                             |
|     |                                                                                                             | LOAN FROM MONEY LENDER                                                                                         | 08  |     |                                                                                               |                                                                                                        |                      |                         |                            |                |                                                      |                |                                                                                                     |            |                  |                                                                            |     |                                                                                   |                                                                                                             |
|     |                                                                                                             | INHERITED                                                                                                      | 09  |     |                                                                                               |                                                                                                        |                      |                         |                            |                |                                                      |                |                                                                                                     |            |                  |                                                                            |     |                                                                                   |                                                                                                             |
|     |                                                                                                             | OTHER (SPECIFY)                                                                                                | 10  |     |                                                                                               |                                                                                                        |                      |                         |                            |                |                                                      |                |                                                                                                     |            |                  |                                                                            |     |                                                                                   |                                                                                                             |
|     |                                                                                                             | NONE                                                                                                           | 11  |     |                                                                                               |                                                                                                        |                      |                         |                            |                |                                                      |                |                                                                                                     |            |                  |                                                                            |     |                                                                                   |                                                                                                             |
|     | HOURS PER WEEK                                                                                              | 1st                                                                                                            | 2nd | 3rd | KSHS                                                                                          | Rent KSHS                                                                                              | Salaries, wages KSHS | Licences and Taxes KSHS | Electricity and water KSHS | Insurance KSHS | purchase of business wares and Goods for resale KSHS | Transport KSHS | purchase of inputs and other raw materials for producing final goods or for providing services KSHS | Other KSHS | TOTAL COSTS KSHS | 1st                                                                        | 2nd | KSHS                                                                              |                                                                                                             |
|     |                                                                                                             |                                                                                                                |     |     |                                                                                               |                                                                                                        |                      |                         |                            |                |                                                      |                |                                                                                                     |            |                  |                                                                            |     |                                                                                   |                                                                                                             |
|     | 1                                                                                                           |                                                                                                                |     |     |                                                                                               |                                                                                                        |                      |                         |                            |                |                                                      |                |                                                                                                     |            |                  |                                                                            |     |                                                                                   |                                                                                                             |
|     | 2                                                                                                           |                                                                                                                |     |     |                                                                                               |                                                                                                        |                      |                         |                            |                |                                                      |                |                                                                                                     |            |                  |                                                                            |     |                                                                                   |                                                                                                             |
|     | 3                                                                                                           |                                                                                                                |     |     |                                                                                               |                                                                                                        |                      |                         |                            |                |                                                      |                |                                                                                                     |            |                  |                                                                            |     |                                                                                   |                                                                                                             |
|     | 4                                                                                                           |                                                                                                                |     |     |                                                                                               |                                                                                                        |                      |                         |                            |                |                                                      |                |                                                                                                     |            |                  |                                                                            |     |                                                                                   |                                                                                                             |
|     | 5                                                                                                           |                                                                                                                |     |     |                                                                                               |                                                                                                        |                      |                         |                            |                |                                                      |                |                                                                                                     |            |                  |                                                                            |     |                                                                                   |                                                                                                             |
|     | 6                                                                                                           |                                                                                                                |     |     |                                                                                               |                                                                                                        |                      |                         |                            |                |                                                      |                |                                                                                                     |            |                  |                                                                            |     |                                                                                   |                                                                                                             |
|     | 7                                                                                                           |                                                                                                                |     |     |                                                                                               |                                                                                                        |                      |                         |                            |                |                                                      |                |                                                                                                     |            |                  |                                                                            |     |                                                                                   |                                                                                                             |
|     | 8                                                                                                           |                                                                                                                |     |     |                                                                                               |                                                                                                        |                      |                         |                            |                |                                                      |                |                                                                                                     |            |                  |                                                                            |     |                                                                                   |                                                                                                             |
|     | 9                                                                                                           |                                                                                                                |     |     |                                                                                               |                                                                                                        |                      |                         |                            |                |                                                      |                |                                                                                                     |            |                  |                                                                            |     |                                                                                   |                                                                                                             |
|     | 10                                                                                                          |                                                                                                                |     |     |                                                                                               |                                                                                                        |                      |                         |                            |                |                                                      |                |                                                                                                     |            |                  |                                                                            |     |                                                                                   |                                                                                                             |
|     | 11                                                                                                          |                                                                                                                |     |     |                                                                                               |                                                                                                        |                      |                         |                            |                |                                                      |                |                                                                                                     |            |                  |                                                                            |     |                                                                                   |                                                                                                             |
|     | 12                                                                                                          |                                                                                                                |     |     |                                                                                               |                                                                                                        |                      |                         |                            |                |                                                      |                |                                                                                                     |            |                  |                                                                            |     |                                                                                   |                                                                                                             |

SECTION R: TRANSFERS

[ASK OF HOUSEHOLD HEAD OR MOST KNOWLEDGEABLE RESPONDENT]

R01: Has the household received or given out any transfers (cash or in-kind) (include CEREMONIAL EXPENDITURES) during past 12 months?

YES. 1  
NO . 2  
(>R10)

|                                                                                                                                                                                                                                    |                                                                                                                                                                                                                                    |                                                                                                                                                                                                                                   |                                                                                                                                                                                                                                       |                                                                                                                                                                                          |                                                                                                                                                         |                                                                                                                                                         |                                                                                                                                                         |  |  |  |  |  |  |  |  |  |  |  |
|------------------------------------------------------------------------------------------------------------------------------------------------------------------------------------------------------------------------------------|------------------------------------------------------------------------------------------------------------------------------------------------------------------------------------------------------------------------------------|-----------------------------------------------------------------------------------------------------------------------------------------------------------------------------------------------------------------------------------|---------------------------------------------------------------------------------------------------------------------------------------------------------------------------------------------------------------------------------------|------------------------------------------------------------------------------------------------------------------------------------------------------------------------------------------|---------------------------------------------------------------------------------------------------------------------------------------------------------|---------------------------------------------------------------------------------------------------------------------------------------------------------|---------------------------------------------------------------------------------------------------------------------------------------------------------|--|--|--|--|--|--|--|--|--|--|--|
| <div>R02</div> <div>Over the past 12 months, did household <u>receive</u> any gifts (in cash or in-kind) from any source (Individuals / family/institutions) outside your household?</div> <div>YES 1<br/>NO 2<br/>(&gt;R06)</div> | <div>R03</div> <div>What was the total value of all <u>cash</u> received as a gift from (.....) in the last 12 months?</div> <div>Kshs</div> <div>IndividualNon profitGovernmentCorporateOutside<br/>1InstitutionSectorKenya</div> | <div>R04</div> <div>What was the total value of all <u>food</u> received as a gift from (....) in the last 12 months?</div> <div>Kshs</div> <div>IndividualNon profitGovernmentCorporateOutside<br/>1InstitutionSectorKenya</div> | <div>R05</div> <div>What was the total value of <u>all other in-kind gifts</u> received from (...) in the last 12 months?</div> <div>Kshs</div> <div>IndividualNon profitGovernmentCorporateOutside<br/>1InstitutionSectorKenya</div> | <div>R06</div> <div>Over the past 12 months, did household <u>give out</u> any gifts (in cash or in-kind) to any individuals/institutions?</div> <div>YES 1<br/>NO 2<br/>(&gt;R10)</div> | <div>R07</div> <div>What was the total value of all <u>cash</u> given as a gift to individuals/institution in the last 12 months?</div> <div>KSHS</div> | <div>R08</div> <div>What was the total value of all <u>food</u> given as a gift to individuals/institution in the last 12 months?</div> <div>KSHS</div> | <div>R09</div> <div>What was the total value of <u>all other in-kind gifts</u> to individuals/institutions in the last 12 months?</div> <div>KSHS</div> |  |  |  |  |  |  |  |  |  |  |  |
|                                                                                                                                                                                                                                    |                                                                                                                                                                                                                                    |                                                                                                                                                                                                                                   |                                                                                                                                                                                                                                       |                                                                                                                                                                                          |                                                                                                                                                         |                                                                                                                                                         |                                                                                                                                                         |  |  |  |  |  |  |  |  |  |  |  |

|                                                                                                                                          |                                                                                                                                                                                                                                                                                                                                                                            |      |      |      |      |   |   |   |   |
|------------------------------------------------------------------------------------------------------------------------------------------|----------------------------------------------------------------------------------------------------------------------------------------------------------------------------------------------------------------------------------------------------------------------------------------------------------------------------------------------------------------------------|------|------|------|------|---|---|---|---|
| <div>R10</div> <div>Which individuals in the household were members of a self-help group in the past 12 months?</div> <div>ID CODE</div> | <div>R11</div> <div>Type of self-help group member belongs to</div> <div>WOMEN'S/MEN'S GROUP 1<br/>MERRY-GO-ROUND 2<br/>YOUTH-RELATED 3<br/>RELIGIOUS-RELATED 4<br/>FAMILY-RELATED 5<br/>SOCIAL WELFARE GROUPS 6<br/>OTHER (SPECIFY) 7</div> <table><tr><td>TYPE</td><td>TYPE</td><td>TYPE</td><td>TYPE</td></tr><tr><td>1</td><td>2</td><td>3</td><td>4</td></tr></table> | TYPE | TYPE | TYPE | TYPE | 1 | 2 | 3 | 4 |
| TYPE                                                                                                                                     | TYPE                                                                                                                                                                                                                                                                                                                                                                       | TYPE | TYPE |      |      |   |   |   |   |
| 1                                                                                                                                        | 2                                                                                                                                                                                                                                                                                                                                                                          | 3    | 4    |      |      |   |   |   |   |

|  |  |  |  |  |
|--|--|--|--|--|
|  |  |  |  |  |
|  |  |  |  |  |
|  |  |  |  |  |
|  |  |  |  |  |
|  |  |  |  |  |
|  |  |  |  |  |
|  |  |  |  |  |
|  |  |  |  |  |
|  |  |  |  |  |

SECTION S: OTHER INCOME

[ASK OF HOUSEHOLD HEAD OR MOST KNOWLEDGEABLE RESPONDENT]

S01: Has any member of your household received any other income (NOT MENTIONED ELSEWHERE) in the past 12 months?

YES . 1  
NO . 2 (»NEXT SECTION)

|                                                                                                                       |                                                                                       |                                                                                     |                                                                          |                                                                                            |                                                                          |            |      |                 |                          |                                                                                |                                 |        |                                                                                           |        |
|-----------------------------------------------------------------------------------------------------------------------|---------------------------------------------------------------------------------------|-------------------------------------------------------------------------------------|--------------------------------------------------------------------------|--------------------------------------------------------------------------------------------|--------------------------------------------------------------------------|------------|------|-----------------|--------------------------|--------------------------------------------------------------------------------|---------------------------------|--------|-------------------------------------------------------------------------------------------|--------|
| S02                                                                                                                   | S03                                                                                   | S04                                                                                 | S05                                                                      | S06                                                                                        | S07                                                                      |            |      |                 |                          | S08                                                                            | S09                             |        | S10                                                                                       |        |
| Do any members of your household receive any regular income from <u>savings, interest</u> or other investment income? | How much does your household receive in savings, interest or other investment income? | Do any members of your household receive any regular income from a <u>pension</u> ? | How much did your household receive in pension income in the last month? | Do any members of your household receive any regular income from <u>rental of property</u> | How much does your household usually receive in rental income per month? |            |      |                 |                          | Do any members of your household receive any regular income of any other type? | What type of income? (Describe) |        | How much does your household usually receive from this other income(s) per month in KSHS? |        |
| YES 1<br>NO 2<br>(»S04)                                                                                               |                                                                                       | YES 1<br>NO 2<br>(»S06)                                                             |                                                                          | YES 1<br>NO 2<br>(»S08)                                                                    | RESIDENTIAL                                                              | COMMERCIAL | LAND | SUB SOIL ASSETS | OTHER PROPERTY (Specify) | YES..... 1<br>NO ..... 2<br>(» S11)                                            |                                 |        |                                                                                           |        |
|                                                                                                                       | KSHS                                                                                  |                                                                                     | KSHS                                                                     |                                                                                            | KSHS                                                                     | KSHS       | KSHS | KSHS            | KSHS                     |                                                                                | Type 1                          | Type 2 | Type 1                                                                                    | Type 2 |
|                                                                                                                       |                                                                                       |                                                                                     |                                                                          |                                                                                            |                                                                          |            |      |                 |                          |                                                                                |                                 |        |                                                                                           |        |

|                                                                                                |                                |        |                                                                                                     |
|------------------------------------------------------------------------------------------------|--------------------------------|--------|-----------------------------------------------------------------------------------------------------|
| S11                                                                                            | S12                            |        | S13                                                                                                 |
| Did any member of your HH receive any other sort of income (Non Regular) in the last 12 months | What type of income (Describe) |        | How much in total did the HH receive in form of this income(s) (Non Regular) in the last 12 months? |
| YES 1<br>NO 2<br>(»NEXT SECTION)                                                               | Type 1                         | Type 2 | KSHS                                                                                                |
|                                                                                                |                                |        |                                                                                                     |
|                                                                                                |                                |        |                                                                                                     |

**SECTION T: RECENT SHOCKS TO HOUSEHOLD WELFARE**  
**[ASK OF HOUSEHOLD HEAD OR MOST KNOWLEDGEABLE RESPONDENT]**

| T01  | T02                                                                                                                                                                                                                               |  | T03                                                                                                                        |                                                                                                                                                             | T04                                                              | T05                                                                                                                                              | T06                                                                                                                                 | T07                                                             | T08                                                                                                                                                                                           |                                                                                                                                                                                                                                                                                                                                                                                                                                                                                                                                                                                                                                                                                                                                                                                                                                                                                                                                                                                              |  |
|------|-----------------------------------------------------------------------------------------------------------------------------------------------------------------------------------------------------------------------------------|--|----------------------------------------------------------------------------------------------------------------------------|-------------------------------------------------------------------------------------------------------------------------------------------------------------|------------------------------------------------------------------|--------------------------------------------------------------------------------------------------------------------------------------------------|-------------------------------------------------------------------------------------------------------------------------------------|-----------------------------------------------------------------|-----------------------------------------------------------------------------------------------------------------------------------------------------------------------------------------------|----------------------------------------------------------------------------------------------------------------------------------------------------------------------------------------------------------------------------------------------------------------------------------------------------------------------------------------------------------------------------------------------------------------------------------------------------------------------------------------------------------------------------------------------------------------------------------------------------------------------------------------------------------------------------------------------------------------------------------------------------------------------------------------------------------------------------------------------------------------------------------------------------------------------------------------------------------------------------------------------|--|
|      | Over the past <b>five years</b> , was your household severely affected negatively by any of the following events?<br><br><b>GO THROUGH ENTIRE LIST BEFORE PROCEEDING TO T03.</b><br><div>YES 1<br/>NO 2<br/>(&gt;NEXT ITEM)</div> |  | Rank the three most significant shocks you experienced<br><br>Most severe 1<br>Second most severe 2<br>Third most severe 3 |                                                                                                                                                             | What was the estimated value lost due to this shock?<br><br>KSHS | Did <b>[THIS SHOCK]</b> cause a reduction in household income and/or assets?<br><br>INCOME LOSS 1<br>ASSET LOSS 2<br>LOSS OF BOTH 3<br>NEITHER 4 | <b>[THIS SHOCK]</b> affected: [READ]<br><br>OWN HH ONLY 1<br>SOME OTHER HH TOO 2<br>MOST HH IN COMMUNITY 3<br>ALL HH IN COMMUNITY 4 | How long ago did <b>[THIS SHOCK]</b> occur?<br><br>YEARS MONTHS | What did you do in response to <b>[THIS SHOCK]</b> to try to cope / regain your former welfare level?<br><br><b>[LIST UP TO 3 BY ORDER OF IMPORTANCE, CODES AT RIGHT.]</b><br><br>1ST 2ND 3RD | spent cash saving 01<br>Sent children to live with relatives 02<br>Sold assets (tools, furniture etc) 03<br>Sold farm land 04<br>Rented out farm land 05<br>Sold animals 06<br>Sold more crops 07<br>Worked more, worked longer hours 08<br>Other household members who weren't working went to work 09<br>Started a new business 10<br>Removed children from school to work 11<br>Went elsewhere to find work for more than a month 12<br>Borrowed money from relatives 13<br>Borrowed money from money lender 14<br>Borrowed money from institutions (banks etc) 15<br>Received help from religious institutions 16<br>Received help from local NGO 17<br>Received help from international NGO 18<br>Received help from Government 19<br>Received help from family/friends 20<br>Reduced food consumption 21<br>Consumed lower cost, but less preferred foods 22<br>Reduced non food expenditures 23<br>Spiritual help- prayers, sacrifices, consulted diviner etc 24<br>Others specify 25 |  |
| CODE |                                                                                                                                                                                                                                   |  |                                                                                                                            |                                                                                                                                                             |                                                                  |                                                                                                                                                  |                                                                                                                                     |                                                                 |                                                                                                                                                                                               |                                                                                                                                                                                                                                                                                                                                                                                                                                                                                                                                                                                                                                                                                                                                                                                                                                                                                                                                                                                              |  |
| 101  | Drought or Floods                                                                                                                                                                                                                 |  |                                                                                                                            | <b>THE QUEST-IONS TO THE RIGHT SHOULD ONLY BE ASKED CONCERNING THE THREE MOST SEVERE SHOCKS, AS NOTED IN T03.</b><br><br><b>LEAVE ALL OTHER ROWS BLANK.</b> |                                                                  |                                                                                                                                                  |                                                                                                                                     |                                                                 |                                                                                                                                                                                               |                                                                                                                                                                                                                                                                                                                                                                                                                                                                                                                                                                                                                                                                                                                                                                                                                                                                                                                                                                                              |  |
| 102  | Crop disease or crop pests                                                                                                                                                                                                        |  |                                                                                                                            |                                                                                                                                                             |                                                                  |                                                                                                                                                  |                                                                                                                                     |                                                                 |                                                                                                                                                                                               |                                                                                                                                                                                                                                                                                                                                                                                                                                                                                                                                                                                                                                                                                                                                                                                                                                                                                                                                                                                              |  |
| 103  | Livestock died or were stolen                                                                                                                                                                                                     |  |                                                                                                                            |                                                                                                                                                             |                                                                  |                                                                                                                                                  |                                                                                                                                     |                                                                 |                                                                                                                                                                                               |                                                                                                                                                                                                                                                                                                                                                                                                                                                                                                                                                                                                                                                                                                                                                                                                                                                                                                                                                                                              |  |
| 104  | Household business failure, non-agricultural                                                                                                                                                                                      |  |                                                                                                                            |                                                                                                                                                             |                                                                  |                                                                                                                                                  |                                                                                                                                     |                                                                 |                                                                                                                                                                                               |                                                                                                                                                                                                                                                                                                                                                                                                                                                                                                                                                                                                                                                                                                                                                                                                                                                                                                                                                                                              |  |
| 105  | Loss of salaried employment or non-payment of salary                                                                                                                                                                              |  |                                                                                                                            |                                                                                                                                                             |                                                                  |                                                                                                                                                  |                                                                                                                                     |                                                                 |                                                                                                                                                                                               |                                                                                                                                                                                                                                                                                                                                                                                                                                                                                                                                                                                                                                                                                                                                                                                                                                                                                                                                                                                              |  |
| 106  | End of regular assistance, aid, or remittances from outside HH                                                                                                                                                                    |  |                                                                                                                            |                                                                                                                                                             |                                                                  |                                                                                                                                                  |                                                                                                                                     |                                                                 |                                                                                                                                                                                               |                                                                                                                                                                                                                                                                                                                                                                                                                                                                                                                                                                                                                                                                                                                                                                                                                                                                                                                                                                                              |  |
| 107  | Large fall in sale prices for crops                                                                                                                                                                                               |  |                                                                                                                            |                                                                                                                                                             |                                                                  |                                                                                                                                                  |                                                                                                                                     |                                                                 |                                                                                                                                                                                               |                                                                                                                                                                                                                                                                                                                                                                                                                                                                                                                                                                                                                                                                                                                                                                                                                                                                                                                                                                                              |  |
| 108  | Large rise in price of food                                                                                                                                                                                                       |  |                                                                                                                            |                                                                                                                                                             |                                                                  |                                                                                                                                                  |                                                                                                                                     |                                                                 |                                                                                                                                                                                               |                                                                                                                                                                                                                                                                                                                                                                                                                                                                                                                                                                                                                                                                                                                                                                                                                                                                                                                                                                                              |  |
| 109  | Large rise in agricultural input prices                                                                                                                                                                                           |  |                                                                                                                            |                                                                                                                                                             |                                                                  |                                                                                                                                                  |                                                                                                                                     |                                                                 |                                                                                                                                                                                               |                                                                                                                                                                                                                                                                                                                                                                                                                                                                                                                                                                                                                                                                                                                                                                                                                                                                                                                                                                                              |  |
| 110  | Severe water shortage                                                                                                                                                                                                             |  |                                                                                                                            |                                                                                                                                                             |                                                                  |                                                                                                                                                  |                                                                                                                                     |                                                                 |                                                                                                                                                                                               |                                                                                                                                                                                                                                                                                                                                                                                                                                                                                                                                                                                                                                                                                                                                                                                                                                                                                                                                                                                              |  |
| 111  | Chronic/severe illness or accident of household member                                                                                                                                                                            |  |                                                                                                                            |                                                                                                                                                             |                                                                  |                                                                                                                                                  |                                                                                                                                     |                                                                 |                                                                                                                                                                                               |                                                                                                                                                                                                                                                                                                                                                                                                                                                                                                                                                                                                                                                                                                                                                                                                                                                                                                                                                                                              |  |
| 112  | Birth in the household                                                                                                                                                                                                            |  |                                                                                                                            |                                                                                                                                                             |                                                                  |                                                                                                                                                  |                                                                                                                                     |                                                                 |                                                                                                                                                                                               |                                                                                                                                                                                                                                                                                                                                                                                                                                                                                                                                                                                                                                                                                                                                                                                                                                                                                                                                                                                              |  |
| 113  | Death of HH head                                                                                                                                                                                                                  |  |                                                                                                                            |                                                                                                                                                             |                                                                  |                                                                                                                                                  |                                                                                                                                     |                                                                 |                                                                                                                                                                                               |                                                                                                                                                                                                                                                                                                                                                                                                                                                                                                                                                                                                                                                                                                                                                                                                                                                                                                                                                                                              |  |
| 114  | Death of working member of household                                                                                                                                                                                              |  |                                                                                                                            |                                                                                                                                                             |                                                                  |                                                                                                                                                  |                                                                                                                                     |                                                                 |                                                                                                                                                                                               |                                                                                                                                                                                                                                                                                                                                                                                                                                                                                                                                                                                                                                                                                                                                                                                                                                                                                                                                                                                              |  |
| 115  | Death of other family member                                                                                                                                                                                                      |  |                                                                                                                            |                                                                                                                                                             |                                                                  |                                                                                                                                                  |                                                                                                                                     |                                                                 |                                                                                                                                                                                               |                                                                                                                                                                                                                                                                                                                                                                                                                                                                                                                                                                                                                                                                                                                                                                                                                                                                                                                                                                                              |  |
| 116  | Break-up of the household                                                                                                                                                                                                         |  |                                                                                                                            |                                                                                                                                                             |                                                                  |                                                                                                                                                  |                                                                                                                                     |                                                                 |                                                                                                                                                                                               |                                                                                                                                                                                                                                                                                                                                                                                                                                                                                                                                                                                                                                                                                                                                                                                                                                                                                                                                                                                              |  |
| 117  | Jailed                                                                                                                                                                                                                            |  |                                                                                                                            |                                                                                                                                                             |                                                                  |                                                                                                                                                  |                                                                                                                                     |                                                                 |                                                                                                                                                                                               |                                                                                                                                                                                                                                                                                                                                                                                                                                                                                                                                                                                                                                                                                                                                                                                                                                                                                                                                                                                              |  |
| 118  | Fire                                                                                                                                                                                                                              |  |                                                                                                                            |                                                                                                                                                             |                                                                  |                                                                                                                                                  |                                                                                                                                     |                                                                 |                                                                                                                                                                                               |                                                                                                                                                                                                                                                                                                                                                                                                                                                                                                                                                                                                                                                                                                                                                                                                                                                                                                                                                                                              |  |
| 119  | Carjacking/Robbery/burglary/assault                                                                                                                                                                                               |  |                                                                                                                            |                                                                                                                                                             |                                                                  |                                                                                                                                                  |                                                                                                                                     |                                                                 |                                                                                                                                                                                               |                                                                                                                                                                                                                                                                                                                                                                                                                                                                                                                                                                                                                                                                                                                                                                                                                                                                                                                                                                                              |  |
| 120  | Dwelling damaged, destroyed                                                                                                                                                                                                       |  |                                                                                                                            |                                                                                                                                                             |                                                                  |                                                                                                                                                  |                                                                                                                                     |                                                                 |                                                                                                                                                                                               |                                                                                                                                                                                                                                                                                                                                                                                                                                                                                                                                                                                                                                                                                                                                                                                                                                                                                                                                                                                              |  |
| 121  | HIV/AIDS                                                                                                                                                                                                                          |  |                                                                                                                            |                                                                                                                                                             |                                                                  |                                                                                                                                                  |                                                                                                                                     |                                                                 |                                                                                                                                                                                               |                                                                                                                                                                                                                                                                                                                                                                                                                                                                                                                                                                                                                                                                                                                                                                                                                                                                                                                                                                                              |  |
| 122  | Other 1 _____                                                                                                                                                                                                                     |  |                                                                                                                            |                                                                                                                                                             |                                                                  |                                                                                                                                                  |                                                                                                                                     |                                                                 |                                                                                                                                                                                               |                                                                                                                                                                                                                                                                                                                                                                                                                                                                                                                                                                                                                                                                                                                                                                                                                                                                                                                                                                                              |  |
| 123  | Other 2 _____                                                                                                                                                                                                                     |  |                                                                                                                            |                                                                                                                                                             |                                                                  |                                                                                                                                                  |                                                                                                                                     |                                                                 |                                                                                                                                                                                               |                                                                                                                                                                                                                                                                                                                                                                                                                                                                                                                                                                                                                                                                                                                                                                                                                                                                                                                                                                                              |  |

## **SECTION U: CREDIT**

**ASK OF HOUSEHOLD HEAD AND PERSONS RESPONSIBLE FOR LOANS LISTED.**

[illegible][illegible]

### CODES FOR U04 & U13

|                        |    |                        |    |
|------------------------|----|------------------------|----|
| COMMERCIAL BANKS       | 01 | GROCERY/LOCAL MERCHANT | 08 |
| MICRO-FINANCE INST.    | 02 | MONEY LENDER (Shylock) | 09 |
| BUILDING SOC./MORTGAGE | 03 | EMPLOYER               | 10 |
| INSURANCE COMPANIES    | 04 | RELIGIOUS INST.        | 11 |
| SACCOS                 | 05 | NGO                    | 12 |
| OTHER FINANCIAL INST.  | 06 | SELF-HELP GROUPS       | 13 |
| NEIGHBOURS / FRIENDS   | 07 | OTHER (Specify)        | 14 |
